# Supplementary material
Source: PubMed Central journal article supplement (PMC10461789)
Supplement: ehp12158.s001.acco.pdf [file ehp12158.s001.acco.pdf]

**Note to readers with disabilities:** *EHP* strives to ensure that all journal content is accessible to all readers. However, some figures and Supplemental Material published in *EHP* articles may not conform to [508 standards](#) due to the complexity of the information being presented. If you need assistance accessing journal content, please contact [ehp508@niehs.nih.gov](mailto:ehp508@niehs.nih.gov). Our staff will work with you to assess and meet your accessibility needs within 3 working days.

### **Supplemental Material**

#### **Health Effects of Cyclones: A Systematic Review and Meta-Analysis of Epidemiological Studies**

Wenzhong Huang, Yuan Gao, Rongbin Xu, Zhengyu Yang, Pei Yu, Tingting Ye, Elizabeth A. Ritchie, Shanshan Li, and Yuming Guo

#### **Table of Contents**

**Table S1.** Search strategies and initial results, organised by database.

**Table S2.** Criteria for the risk of bias assessment for included studies, adapted from the Office of Health Assessment and Translation (OHAT).

**Table S3.** Summary of the basic characteristics of the included studies.

**Table S4.** Heat map for risk of bias rating and quality rating for the included studies.

**Table S5.** Details of risk of bias assessment for included studies.

**Table S6.** Summary of the studies included in meta-analysis and sensitivity analysis by excluding each effect estimate in turn.

**Figure S1.** Flowchart of the study selection.

**Figure S2.** Contour-enhanced funnel plot analysis on the detection of publication bias in the meta-analysis of the association between cyclone exposures and all-cause (a), heart disease (b) and diabetes (c) mortality, with background color indicating the significance of the studies ( $P \geq 0.05$ : white background;  $P < 0.05$ : dark blue;  $P < 0.025$ : blue;  $P < 0.01$ : light blue).

**Figure S3.** Contour-enhanced funnel plot analysis on the detection of publication bias in the meta-analysis of the association between cyclone exposures and all-cause hospitalization (a), respiratory hospitalization (b) and chronic obstructive pulmonary disease hospitalization, with background color indicating the significance of the studies ( $P \geq 0.05$ : white background;  $P < 0.05$ : dark blue;  $P < 0.025$ : blue;  $P < 0.01$ : light blue).

**Figure S4.** Contour-enhanced funnel plot analysis on the detection of publication bias in the meta-analysis of the association between cyclone exposures and preterm birth, with background color indicating the significance of the studies ( $P \geq 0.05$ : white background;  $P < 0.05$ : dark blue;  $P < 0.025$ : blue;  $P < 0.01$ : light blue).

## References

**Table S1.** Search strategies and initial results, organised by database

| #                                                                                                                                                                  | Query                                                                                                                                                                                                                                                                          | Results    |
|--------------------------------------------------------------------------------------------------------------------------------------------------------------------|--------------------------------------------------------------------------------------------------------------------------------------------------------------------------------------------------------------------------------------------------------------------------------|------------|
| <b>Ovid MEDLINE(R) and Epub Ahead of Print, In-Process, In-Data-Review &amp; Other Non-Indexed Citations, Daily and Versions &lt;1946 to December 21, 2022&gt;</b> |                                                                                                                                                                                                                                                                                |            |
| 1                                                                                                                                                                  | exp Cyclonic Storms/                                                                                                                                                                                                                                                           | 2,890      |
| 2                                                                                                                                                                  | tropical storm*.mp.                                                                                                                                                                                                                                                            | 272        |
| 3                                                                                                                                                                  | (cyclon* or hurricane* or typhoon*).mp.                                                                                                                                                                                                                                        | 8,948      |
| 4                                                                                                                                                                  | 1 or 2 or 3                                                                                                                                                                                                                                                                    | 9,047      |
| 5                                                                                                                                                                  | morbidity/ or mortality/ or "cause of death"/                                                                                                                                                                                                                                  | 126,230    |
| 6                                                                                                                                                                  | patient care/ or hospitalization/ or patient admission/ or patient discharge/ or patient readmission/                                                                                                                                                                          | 212,876    |
| 7                                                                                                                                                                  | patients/ or inpatients/                                                                                                                                                                                                                                                       | 50,242     |
| 8                                                                                                                                                                  | exp disease/ or exp disease attributes/                                                                                                                                                                                                                                        | 1,777,766  |
| 9                                                                                                                                                                  | emergency service, hospital/ or trauma centers/ or exp Emergency Medical Services/ or Ambulances/ or Air Ambulances/                                                                                                                                                           | 165,388    |
| 10                                                                                                                                                                 | exp "Wounds and Injuries"/                                                                                                                                                                                                                                                     | 992,668    |
| 11                                                                                                                                                                 | exp "diseases (non mesh)"/                                                                                                                                                                                                                                                     | 16,674,666 |
| 12                                                                                                                                                                 | mental health/ or mental disorders/ or exp anxiety disorders/ or exp mood disorders/ or exp "trauma and stressor related disorders"/ or mental health services/                                                                                                                | 471,347    |
| 13                                                                                                                                                                 | exp pregnancy/ or exp pregnancy outcome/                                                                                                                                                                                                                                       | 988,078    |
| 14                                                                                                                                                                 | exp pregnancy/ or exp pregnancy outcome/ or exp pregnancy complications/                                                                                                                                                                                                       | 1,020,885  |
| 15                                                                                                                                                                 | (health* or disease* or mortalit* or morbidit* or hospital* or admission* or injur* or traum* or emergency or emergencies or ambulanc*).mp.                                                                                                                                    | 13,023,855 |
| 16                                                                                                                                                                 | (pregnan* or gestation* or maternal or preterm* or pre term* or pre matur* or prematur* or post matur* or postmatur* or abortion* or stillbirth* or still birth*).mp.                                                                                                          | 1,463,058  |
| 17                                                                                                                                                                 | (asthm* or cardio* or cardia* or myocardi* or allerg* or respirator* or COPD or lung diseas* or lung function* or pulmonary disease* or bronchopulmonary or mental health* or mental illness* or mental wellbeing or mental well being or sleep* or disorder* or insomni*).mp. | 5,342,787  |
| 18                                                                                                                                                                 | 5 or 6 or 7 or 8 or 9 or 10 or 11 or 12 or 13 or 14 or 15 or 16 or 17                                                                                                                                                                                                          | 21,966,162 |
| 19                                                                                                                                                                 | 4 and 18                                                                                                                                                                                                                                                                       | 4,581      |
| 20                                                                                                                                                                 | exp animals/ not humans.sh.                                                                                                                                                                                                                                                    | 5,075,475  |
| 21                                                                                                                                                                 | 19 not 20                                                                                                                                                                                                                                                                      | 4,358      |
| <b>Embase Classic+Embase &lt;1947 to December 21, 2022&gt;</b>                                                                                                     |                                                                                                                                                                                                                                                                                |            |
| 1                                                                                                                                                                  | exp hurricane/                                                                                                                                                                                                                                                                 | 5,042      |
| 2                                                                                                                                                                  | (cyclon* or hurricane* or typhoon*).mp.                                                                                                                                                                                                                                        | 12,105     |
| 3                                                                                                                                                                  | tropical storm*.mp.                                                                                                                                                                                                                                                            | 281        |
| 4                                                                                                                                                                  | 1 or 2 or 3                                                                                                                                                                                                                                                                    | 12,219     |
| 5                                                                                                                                                                  | exp morbidity/ or exp mortality/                                                                                                                                                                                                                                               | 1,566,655  |
| 6                                                                                                                                                                  | "cause of death"/                                                                                                                                                                                                                                                              | 138,013    |
| 7                                                                                                                                                                  | exp patient/                                                                                                                                                                                                                                                                   | 3,292,478  |
| 8                                                                                                                                                                  | hospital admission/ or hospital discharge/ or hospital readmission/ or hospitalization/                                                                                                                                                                                        | 880,410    |
| 9                                                                                                                                                                  | emergency ward/                                                                                                                                                                                                                                                                | 194,603    |
| 10                                                                                                                                                                 | emergency health service/ or emergency medical dispatch/ or hospital emergency service/ or psychiatric emergency service/                                                                                                                                                      | 124,082    |
| 11                                                                                                                                                                 | ambulance/                                                                                                                                                                                                                                                                     | 16,319     |
| 12                                                                                                                                                                 | air medical transport/                                                                                                                                                                                                                                                         | 3,410      |
| 13                                                                                                                                                                 | exp injury/                                                                                                                                                                                                                                                                    | 2,787,498  |
| 14                                                                                                                                                                 | exp mental health/                                                                                                                                                                                                                                                             | 220,353    |
| 15                                                                                                                                                                 | mental disease/ or exp anxiety disorder/ or exp mood disorder/ or exp psychotrauma/                                                                                                                                                                                            | 1,035,374  |
| 16                                                                                                                                                                 | exp mental health service/                                                                                                                                                                                                                                                     | 67,630     |
| 17                                                                                                                                                                 | diseases/ or exp "general aspects of disease"/ or exp physical disease/                                                                                                                                                                                                        | 27,039,908 |
| 18                                                                                                                                                                 | sleep/ or sleep quality/ or sleep deprivation/                                                                                                                                                                                                                                 | 161,940    |
| 19                                                                                                                                                                 | pregnancy outcome/                                                                                                                                                                                                                                                             | 76,472     |
| 20                                                                                                                                                                 | exp pregnancy disorder/                                                                                                                                                                                                                                                        | 688,676    |
| 21                                                                                                                                                                 | exp pregnancy/                                                                                                                                                                                                                                                                 | 887,130    |
| 22                                                                                                                                                                 | (health* or disease* or mortalit* or morbidit* or hospital* or admission* or injur* or traum* or emergency or emergencies or ambulanc*).mp.                                                                                                                                    | 18,338,379 |

|                                           |                                                                                                                                                                                                                                                                                                                                                                                                                                                                                                                                                                                                                                                                                                                                                                                                                                                                                                                                                                                                                                                                                                                                                                                                                                                                                                                                                                                                                                                                                                                                                                                                  |            |
|-------------------------------------------|--------------------------------------------------------------------------------------------------------------------------------------------------------------------------------------------------------------------------------------------------------------------------------------------------------------------------------------------------------------------------------------------------------------------------------------------------------------------------------------------------------------------------------------------------------------------------------------------------------------------------------------------------------------------------------------------------------------------------------------------------------------------------------------------------------------------------------------------------------------------------------------------------------------------------------------------------------------------------------------------------------------------------------------------------------------------------------------------------------------------------------------------------------------------------------------------------------------------------------------------------------------------------------------------------------------------------------------------------------------------------------------------------------------------------------------------------------------------------------------------------------------------------------------------------------------------------------------------------|------------|
| 23                                        | (pregnan* or gestation* or maternal or preterm* or pre term* or pre matur* or prematur* or post matur* or postmatur* or abortion* or stillbirth* or still birth*).mp.                                                                                                                                                                                                                                                                                                                                                                                                                                                                                                                                                                                                                                                                                                                                                                                                                                                                                                                                                                                                                                                                                                                                                                                                                                                                                                                                                                                                                            | 1,778,668  |
| 24                                        | (asthm* or cardio* or cardia* or myocardi* or allerg* or respirator* or COPD or lung diseas* or lung function* or pulmonary disease* or bronchopulmonary or mental health* or mental illness* or mental wellbeing or mental well being or sleep* or disorder* or insomni*).mp.                                                                                                                                                                                                                                                                                                                                                                                                                                                                                                                                                                                                                                                                                                                                                                                                                                                                                                                                                                                                                                                                                                                                                                                                                                                                                                                   | 7,887,625  |
| 25                                        | or/5-24                                                                                                                                                                                                                                                                                                                                                                                                                                                                                                                                                                                                                                                                                                                                                                                                                                                                                                                                                                                                                                                                                                                                                                                                                                                                                                                                                                                                                                                                                                                                                                                          | 30,831,072 |
| 26                                        | 4 and 25                                                                                                                                                                                                                                                                                                                                                                                                                                                                                                                                                                                                                                                                                                                                                                                                                                                                                                                                                                                                                                                                                                                                                                                                                                                                                                                                                                                                                                                                                                                                                                                         | 7,216      |
| 27                                        | (exp animal/ or exp invertebrate/ or animal.hw. or nonhuman/) not exp human/                                                                                                                                                                                                                                                                                                                                                                                                                                                                                                                                                                                                                                                                                                                                                                                                                                                                                                                                                                                                                                                                                                                                                                                                                                                                                                                                                                                                                                                                                                                     | 7,875,640  |
| 28                                        | 26 not 27                                                                                                                                                                                                                                                                                                                                                                                                                                                                                                                                                                                                                                                                                                                                                                                                                                                                                                                                                                                                                                                                                                                                                                                                                                                                                                                                                                                                                                                                                                                                                                                        | 6,454      |
| 29                                        | limit 28 to medline                                                                                                                                                                                                                                                                                                                                                                                                                                                                                                                                                                                                                                                                                                                                                                                                                                                                                                                                                                                                                                                                                                                                                                                                                                                                                                                                                                                                                                                                                                                                                                              | 2,270      |
| 30                                        | 28 not 29                                                                                                                                                                                                                                                                                                                                                                                                                                                                                                                                                                                                                                                                                                                                                                                                                                                                                                                                                                                                                                                                                                                                                                                                                                                                                                                                                                                                                                                                                                                                                                                        | 4,184      |
| <b>Pubmed</b> <1947 to December 21, 2022> |                                                                                                                                                                                                                                                                                                                                                                                                                                                                                                                                                                                                                                                                                                                                                                                                                                                                                                                                                                                                                                                                                                                                                                                                                                                                                                                                                                                                                                                                                                                                                                                                  |            |
| 1                                         | "Cyclonic Storms"[MeSH]                                                                                                                                                                                                                                                                                                                                                                                                                                                                                                                                                                                                                                                                                                                                                                                                                                                                                                                                                                                                                                                                                                                                                                                                                                                                                                                                                                                                                                                                                                                                                                          | 2,881      |
| 2                                         | cyclon*[Title/Abstract] OR hurricane*[Title/Abstract] OR typhoon*[Title/Abstract] OR "tropical storm*"[Title/Abstract]                                                                                                                                                                                                                                                                                                                                                                                                                                                                                                                                                                                                                                                                                                                                                                                                                                                                                                                                                                                                                                                                                                                                                                                                                                                                                                                                                                                                                                                                           | 8,047      |
| 3                                         | #1 OR #2                                                                                                                                                                                                                                                                                                                                                                                                                                                                                                                                                                                                                                                                                                                                                                                                                                                                                                                                                                                                                                                                                                                                                                                                                                                                                                                                                                                                                                                                                                                                                                                         | 8,602      |
| 4                                         | Disease[MeSH] OR Mortality[MeSH] OR Morbidity[MeSH] OR "Wounds and Injuries"[MeSH] OR Patients[MeSH] OR "Cause of Death"[MeSH]                                                                                                                                                                                                                                                                                                                                                                                                                                                                                                                                                                                                                                                                                                                                                                                                                                                                                                                                                                                                                                                                                                                                                                                                                                                                                                                                                                                                                                                                   | 2,201,592  |
| 5                                         | Sleep[MeSH] OR "Mental Health"[MeSH]                                                                                                                                                                                                                                                                                                                                                                                                                                                                                                                                                                                                                                                                                                                                                                                                                                                                                                                                                                                                                                                                                                                                                                                                                                                                                                                                                                                                                                                                                                                                                             | 151,259    |
| 6                                         | Pregnancy[MeSH] OR "Pregnancy Outcome"[MeSH] OR "Pregnancy Outcome"[MeSH] OR "Pregnancy Complications"[MeSH]                                                                                                                                                                                                                                                                                                                                                                                                                                                                                                                                                                                                                                                                                                                                                                                                                                                                                                                                                                                                                                                                                                                                                                                                                                                                                                                                                                                                                                                                                     | 1,020,573  |
| 7                                         | (health* OR injur* OR morbid* OR mortal* OR wound* OR stunting* OR rupture* OR burn* OR death* OR fracture* OR incidence* OR diseas* OR patient OR inpatients OR hospital* OR admission* OR emergen* OR ambulanc* OR epidemiolog* OR nutrition* OR pregnan* OR gestation* OR maternal OR preterm* OR pre-term* OR prematur* OR pre-matur* OR post-matur* OR postmatur* OR abortion* OR stillbirth* OR still-birth* OR cardio* OR allerg* OR respirat* OR infect* OR communicab* OR status OR effect* OR traum* OR sleep* OR insomni* OR mental* OR anxiety OR mood OR stress* OR disorder*)[Title/Abstract]                                                                                                                                                                                                                                                                                                                                                                                                                                                                                                                                                                                                                                                                                                                                                                                                                                                                                                                                                                                      | 25,811,266 |
| 8                                         | #4 OR #5 OR #6 OR #7                                                                                                                                                                                                                                                                                                                                                                                                                                                                                                                                                                                                                                                                                                                                                                                                                                                                                                                                                                                                                                                                                                                                                                                                                                                                                                                                                                                                                                                                                                                                                                             | 25,875,999 |
| 9                                         | #3 AND #8                                                                                                                                                                                                                                                                                                                                                                                                                                                                                                                                                                                                                                                                                                                                                                                                                                                                                                                                                                                                                                                                                                                                                                                                                                                                                                                                                                                                                                                                                                                                                                                        | 6,388      |
| 10                                        | # 9 Filters: Humans                                                                                                                                                                                                                                                                                                                                                                                                                                                                                                                                                                                                                                                                                                                                                                                                                                                                                                                                                                                                                                                                                                                                                                                                                                                                                                                                                                                                                                                                                                                                                                              | 3,781      |
| <b>SCOPUS</b> <1955 to December 21, 2022> |                                                                                                                                                                                                                                                                                                                                                                                                                                                                                                                                                                                                                                                                                                                                                                                                                                                                                                                                                                                                                                                                                                                                                                                                                                                                                                                                                                                                                                                                                                                                                                                                  |            |
|                                           | ( TITLE-ABS-KEY ( cyclon* OR hurricane* OR typhoon* OR "tropical storm*" ) ) AND ( ( TITLE-ABS-KEY ( ( health* OR disease* OR mortalit* OR morbidit* OR hospital* OR admission* OR injur* OR traum* OR emergency OR emergencies OR ambulanc* ) ) OR TITLE-ABS-KEY ( ( pregnan* OR gestation* OR maternal OR preterm* OR "pre term*" OR "pre matur*" OR prematur* OR "post matur*" OR postmatur* OR abortion* OR stillbirth* OR "still birth*" ) ) OR TITLE-ABS-KEY ( ( asthm* OR cardio* OR cardia* OR myocardi* OR allerg* OR respirator* OR copd OR "lung diseas*" OR "lung function*" OR "pulmonary disease*" OR bronchopulmonary OR "mental health*" OR "mental illness*" OR "mental wellbeing" OR "mental well being" OR sleep* OR disorder* OR insomni* ) ) ) ) AND ( EXCLUDE ( SUBJAREA , "ENVI" ) OR EXCLUDE ( SUBJAREA , "SOCI" ) OR EXCLUDE ( SUBJAREA , "ENGI" ) OR EXCLUDE ( SUBJAREA , "EART" ) OR EXCLUDE ( SUBJAREA , "AGRI" ) OR EXCLUDE ( SUBJAREA , "COMP" ) OR EXCLUDE ( SUBJAREA , "BUSI" ) OR EXCLUDE ( SUBJAREA , "ENER" ) OR EXCLUDE ( SUBJAREA , "BIOC" ) OR EXCLUDE ( SUBJAREA , "ARTS" ) OR EXCLUDE ( SUBJAREA , "MATH" ) OR EXCLUDE ( SUBJAREA , "DECI" ) OR EXCLUDE ( SUBJAREA , "MATE" ) OR EXCLUDE ( SUBJAREA , "MULT" ) OR EXCLUDE ( SUBJAREA , "PHYS" ) OR EXCLUDE ( SUBJAREA , "CENG" ) OR EXCLUDE ( SUBJAREA , "CHEM" ) OR EXCLUDE ( SUBJAREA , "ECON" ) OR EXCLUDE ( SUBJAREA , "VETE" ) OR EXCLUDE ( SUBJAREA , "Undefined" ) ) AND ( EXCLUDE ( EXACTKEYWORD , "Nonhuman" ) OR EXCLUDE ( EXACTKEYWORD , "Animals" ) OR EXCLUDE ( EXACTKEYWORD , "Animal" ) ) | 3,599      |

| <b>WEB OF SCIENCE Core Collection &lt;1891 to December 21, 2022&gt;</b>                                                                                                                                                                                                                                                                                                                                                                                                                                                                                                                                                                                                                                                                                                                                                                                                                                                                                                                                                                                                                                                                                                                                                                                                                                                                                                                                                                                                                                                                                                                                                                                                                                                                                                                                                                                                  |       |
|--------------------------------------------------------------------------------------------------------------------------------------------------------------------------------------------------------------------------------------------------------------------------------------------------------------------------------------------------------------------------------------------------------------------------------------------------------------------------------------------------------------------------------------------------------------------------------------------------------------------------------------------------------------------------------------------------------------------------------------------------------------------------------------------------------------------------------------------------------------------------------------------------------------------------------------------------------------------------------------------------------------------------------------------------------------------------------------------------------------------------------------------------------------------------------------------------------------------------------------------------------------------------------------------------------------------------------------------------------------------------------------------------------------------------------------------------------------------------------------------------------------------------------------------------------------------------------------------------------------------------------------------------------------------------------------------------------------------------------------------------------------------------------------------------------------------------------------------------------------------------|-------|
| <p>cyclon* OR hurricane* OR typhoon* OR "tropical storm*" (Topic) and health* OR disease* OR mortalit* OR morbidit* OR hospital* OR admission* OR injur* OR traum* OR emergency OR emergencies OR ambulanc* OR pregnan* OR gestation* OR maternal OR preterm* OR "pre term*" OR "pre matur*" OR prematur* OR "post matur*" OR postmatur* OR abortion* OR stillbirth* OR "still birth*" OR asthm* OR cardio* OR cardia* OR myocardi* OR allerg* OR respirator* OR copd OR "lung diseas*" OR "lung function*" OR "pulmonary disease*" OR bronchopulmonary OR "mental health*" OR "mental illness*" OR "mental wellbeing" OR "mental well being" OR sleep* OR disorder* OR insomni* (Topic) and Engineering or Toxicology or Plant Sciences or Pathology or Zoology or Computer Science or Marine Freshwater Biology or Business Economics or Water Resources or Science Technology Other Topics or Immunology or Education Educational Research or Nursing or Food Science Technology or Telecommunications or Information Science Library Science or Physical Geography or Substance Abuse or Mining Mineral Processing or Legal Medicine or Robotics or Agriculture or Mathematics or Energy Fuels or Pharmacology Pharmacy or Public Administration or Government Law or Instruments Instrumentation or Oceanography or Mathematical Computational Biology or Geochemistry Geophysics or Chemistry or Geology or Biodiversity Conservation or Forestry or Geography or Entomology or Fisheries or Surgery or Transportation or Materials Science or Anatomy Morphology or History or Remote Sensing or Neurosciences Neurology or Construction Building Technology or Architecture or Cultural Studies or Arts Humanities Other Topics or International Relations or Cell Biology or Hematology or Automation Control Systems or Physics (Exclude – Research Areas)</p> | 4,169 |

**Table S2.** Criteria for the risk of bias assessment for included studies, adapted from the Office of Health Assessment and Translation (OHAT)<sup>1</sup>

| Bias            | Domains                                | Ratings                                                                                           |                                                                                                                                                                                                                                                                                                                                                                                                                                                                                                                                                                    |
|-----------------|----------------------------------------|---------------------------------------------------------------------------------------------------|--------------------------------------------------------------------------------------------------------------------------------------------------------------------------------------------------------------------------------------------------------------------------------------------------------------------------------------------------------------------------------------------------------------------------------------------------------------------------------------------------------------------------------------------------------------------|
| Key<br>Criteria | Detection bias, exposure<br>assessment | <b>Can we be confident in the exposure characterization?</b>                                      |                                                                                                                                                                                                                                                                                                                                                                                                                                                                                                                                                                    |
|                 |                                        | Low                                                                                               | There is direct evidence that exposure assessment involved representative and reliable measurements of cyclone exposure and a low risk of exposure misclassification (e.g., assessed exposure at individual level, accounted for the persistent and time-varying cyclone exposures)                                                                                                                                                                                                                                                                                |
|                 |                                        | Probably low                                                                                      | There is indirect evidence that the exposure assessment involved representative and reliable measurements of cyclone exposure and a low risk of exposure misclassification                                                                                                                                                                                                                                                                                                                                                                                         |
|                 |                                        | Probably high                                                                                     | There is indirect evidence that the cyclone exposure assessment involved representative and reliable measurements, but could introduce a high risk of exposure misclassification (e.g., exposure assessment was based on a static point-in-time estimate like cyclone hit date that did not account for the cyclone end date, nor consider the persistent or time-varying cyclone exposures) OR There is insufficient information provided about the exposure assessment to judge the validity and reliability, but no evidence for concern about the method used. |
|                 |                                        | High                                                                                              | There is direct evidence that poorly reliable and representative measurements were used to assess cyclone exposure                                                                                                                                                                                                                                                                                                                                                                                                                                                 |
|                 | Detection bias, outcome<br>assessment  | <b>Can we be confident in the outcome assessment?</b>                                             |                                                                                                                                                                                                                                                                                                                                                                                                                                                                                                                                                                    |
|                 |                                        | Low                                                                                               | There is direct evidence that outcome data are from a reliable data source or defined based on standard diagnosis criteria (e.g., International Classification System [ICD] code) OR Studies provide evidence of quality assurance of outcome data.                                                                                                                                                                                                                                                                                                                |
|                 |                                        | Probably low                                                                                      | There is indirect evidence that outcome was assessed or defined using acceptable methods OR It is deemed that the outcome assessment methods used would not appreciably bias results (e.g., objectively measured and quality controlled).                                                                                                                                                                                                                                                                                                                          |
|                 |                                        | Probably high                                                                                     | Outcome was not assessed based on standard diagnosis criteria and there is evidence that suggests the existence of misclassification bias (e.g., objectively measured but less of quality control procedure of measurement) OR There is insufficient information provided about the outcome assessment to judge the validity and reliability, but no evidence for concern about the method used.                                                                                                                                                                   |
|                 | Confounding bias                       | High                                                                                              | Outcome was obtained or defined based on self-reports (parents, family) and data collected, criteria developed by the researcher OR There is direct evidence that suggests the high risk of outcome misclassification bias.                                                                                                                                                                                                                                                                                                                                        |
|                 |                                        | <b>Did the study design or analysis sufficiently account for important confounding variables?</b> |                                                                                                                                                                                                                                                                                                                                                                                                                                                                                                                                                                    |
|                 |                                        | Low                                                                                               | Study accounted for all important confounders which were measured consistently (e.g., age, gender, race/ethnicity, education level, household income, health status for cross-sectional, cohort and case-control studies; time trend, seasonality, day of week, public holiday, variation in expected number of outcomes for time-series study; social-economic status, region, variation in expected number of the outcome).                                                                                                                                      |

|                   |                          |                                                                                     |                                                                                                                                                                                                                                                                                                                                       |
|-------------------|--------------------------|-------------------------------------------------------------------------------------|---------------------------------------------------------------------------------------------------------------------------------------------------------------------------------------------------------------------------------------------------------------------------------------------------------------------------------------|
|                   |                          | Probably low                                                                        | Study accounted for most of confounders AND is not expected to introduce bias.                                                                                                                                                                                                                                                        |
|                   |                          | Probably high                                                                       | Study accounted for some but not all confounders AND is expected to introduce bias.                                                                                                                                                                                                                                                   |
|                   |                          | High                                                                                | Study did not account for potential confounders OR were inappropriately measured.                                                                                                                                                                                                                                                     |
| Other<br>Criteria | Selection bias           | <b>Did selection of study participants result in appropriate comparison groups?</b> |                                                                                                                                                                                                                                                                                                                                       |
|                   |                          | Low                                                                                 | The descriptions of the studied population were sufficiently detailed to support the assertion that risk of selection effects was minimal (e.g., study participants in different exposure levels and with all outcomes had equal opportunity to be included in the study).                                                            |
|                   |                          | Probably low                                                                        | There is insufficient information about population selection to permit a judgment of low risk of bias, but there is indirect evidence that suggests low risk of bias (e.g., study participants in different exposure levels may not have equal opportunity to be in the study).                                                       |
|                   |                          | Probably high                                                                       | There is insufficient information about population selection to permit a judgment of high risk of bias, but there is indirect evidence that suggests high risk of bias (e.g., participants in all exposure levels did not have equal opportunity to be in the study; but not to the extent that seriously bias the effect estimates). |
|                   |                          | High                                                                                | There were indications from descriptions of the studied population of high risk of bias (study only included designated high-risk participants, and participants in all exposure levels did not have equal opportunity to be in the study, to the extent that effect estimates were seriously biased).                                |
|                   | Attrition/exclusion bias | <b>Were outcome data complete without attrition or exclusion from analysis?</b>     |                                                                                                                                                                                                                                                                                                                                       |
|                   |                          | Low                                                                                 | No missing data irrelevant to the true study outcome and no missing outcome data                                                                                                                                                                                                                                                      |
|                   |                          | Probably low                                                                        | Though not sufficient information available to evaluate the incomplete data's risk accurately, there was indirect evidence indicating a low risk of bias.                                                                                                                                                                             |
|                   |                          | Probably high                                                                       | Inadequate information provided to determine whether a risk was high about incomplete data, but there was indirect evidence to suggest a high risk.                                                                                                                                                                                   |
|                   |                          | High                                                                                | Direct evidence to suggest that the missing data on outcomes is relevant to the true study outcome                                                                                                                                                                                                                                    |
|                   | Selective reporting bias | <b>Did the study report all measured outcomes?</b>                                  |                                                                                                                                                                                                                                                                                                                                       |
|                   |                          | Low                                                                                 | The study reported findings on all pre-specified outcomes                                                                                                                                                                                                                                                                             |
|                   |                          | Probably low                                                                        | Inadequate information provided to determine whether a risk of selective outcome was low, but there was indirect evidence to suggest that study was not selectively reported                                                                                                                                                          |
|                   |                          | Probably high                                                                       | Inadequate information provided to determine whether a risk of selective outcome was low, but there was indirect evidence to suggest that study was selectively reported                                                                                                                                                              |
|                   |                          | High                                                                                | The study did not report findings on all pre-specified outcomes, or used methods that were not pre-specified to analyze one/more of the primary outcomes or report the outcomes/findings that were not pre-specified                                                                                                                  |
|                   | Conflict of interest     | Was there potential bias in the reporting through financial sources?                |                                                                                                                                                                                                                                                                                                                                       |

|                      |                                                                                                                                              |                                                                                                                                              |
|----------------------|----------------------------------------------------------------------------------------------------------------------------------------------|----------------------------------------------------------------------------------------------------------------------------------------------|
|                      | Low                                                                                                                                          | No funding was received for this study from entities with a financial interest in the study outcomes.                                        |
|                      | Probably low                                                                                                                                 | Inadequate information provided to determine a low risk, but there was indirect evidence to suggest that the study had no financial interest |
|                      | Probably high                                                                                                                                | Inadequate information provided to determine a low risk, but there was indirect evidence to suggest that the study had financial interest    |
|                      | High                                                                                                                                         | Support was received for this study from entities with a financial interest in the study outcomes.                                           |
| Other source of bias | <b>Bias from other sources not covered elsewhere (statistical methodological appropriateness, researcher compliance with study protocol)</b> |                                                                                                                                              |
|                      | Low                                                                                                                                          | No other sources of bias                                                                                                                     |
|                      | Probably low                                                                                                                                 | Inadequate information provided to determine a low risk, but there was indirect evidence to suggest that the study had no other problems     |
|                      | Probably high                                                                                                                                | Inadequate information provided to determine a low risk, but there was indirect evidence to suggest that the study had other problems        |
|                      | High                                                                                                                                         | At least one important bias detected from other sources                                                                                      |



**Table S3:** Summary of the basic characteristics of the included studies.

| Leading author, year             | Study period | Study settings     | Study design   | Study population (age)          | Sample size                      | Exposure assessment method                                | Included Cyclone(s)              | Exposure window | Comparison                              | Outcome                                                                 | Statistical methods*                     | Estimates                                                                                                                                                                                                                                                                                                                                                                                           |
|----------------------------------|--------------|--------------------|----------------|---------------------------------|----------------------------------|-----------------------------------------------------------|----------------------------------|-----------------|-----------------------------------------|-------------------------------------------------------------------------|------------------------------------------|-----------------------------------------------------------------------------------------------------------------------------------------------------------------------------------------------------------------------------------------------------------------------------------------------------------------------------------------------------------------------------------------------------|
| Begum et al. (2022) <sup>2</sup> | 2001-2015    | New York, US       | Case-crossover | General population (≥ 64 years) | NA                               | FEMA-designated                                           | Hurricane Sandy                  | 3 years         | 94-month period prior to exposure       | Mental health-related ED visit and hospitalizations                     | Time-stratified Poisson regression model | Relative risk for ED visits of mental health (1.10, 95% CI: 1.08, 1.13); no significant increase for hospitalizations of mental health                                                                                                                                                                                                                                                              |
| Parks et al. (2022) <sup>3</sup> | 1988-2018    | US                 | Case-crossover | General population (All Ages)   | 33,619,393                       | Wind field model (maximum sustained winds ≥17.4 m/s)      | All TCs hit US between 1988–2018 | 6 months        | Same months in other non-exposure years | Cause-specific mortality                                                | Bayesian conditional quasi-Poisson model | 3.7% (95% CrI: 2.5%, 4.9%) increased monthly death rates for injuries; 1.8% (95% CrI: 0.1%, 3.6%) for infectious and parasitic diseases; 1.3% (95% CrI, 0.2%, 2.4%) for respiratory diseases; 1.2% (95% CrI, 0.6%, 1.7%) for cardiovascular diseases; 1.2% (95% CrI, 0.1%, 2.4%) for neuropsychiatric conditions; no significant increase for cancer mortality per 1-day increase in TCs in a month |
| Bell et al. (2022) <sup>4</sup>  | 2004-2012    | US                 | Case-crossover | General population (≥ 65 years) | 3,629,637                        | FEMA-designated                                           | Eight large-scale hurricanes     | 30 days         | 240-day period prior to exposure        | Cause-specific hospitalizations                                         | Conditional Poisson regression model     | Incidence rate ratio for hospitalizations for diabetes (1.06, 95% CI: 1.03, 1.10), COPD (1.06, 95% CI: 1.04, 1.08), and congestive heart failure (1.19, 95% CI: 1.17, 1.21)                                                                                                                                                                                                                         |
| Quist et al. (2022) <sup>5</sup> | 2016-2019    | North Carolina, US | Time series    | General population              | about 1,460 (daily observations) | Flood extents (one third or more of the area was flooded) | Hurricanes Matthew and Florence  | 3 weeks         | All non-exposure days                   | ED visits for acute gastrointestinal illness                            | Controlled interrupted time series       | Relative risk (1.11, 95% CI: 1.00, 1.23)                                                                                                                                                                                                                                                                                                                                                            |
| Sands et al. (2022) <sup>6</sup> | 2011-2014    | New Jersey, US     | Cohort         | General population (≥ 65 years) | 909                              | FEMA-designated, storm surge and damaged houses level     | Hurricane Sandy                  | 4 years         | Participants without exposure           | Cardiovascular disease, diabetes, arthritis, and lung disease incidence | Cox proportional hazard model            | No significant change                                                                                                                                                                                                                                                                                                                                                                               |

|                                         |           |                                                                        |                 |                                |                  |                                                                                                                                                           |                                                             |                                         |                                                    |                                                                 |                                                      |                                                                                                                                                                                                                                                                                                      |
|-----------------------------------------|-----------|------------------------------------------------------------------------|-----------------|--------------------------------|------------------|-----------------------------------------------------------------------------------------------------------------------------------------------------------|-------------------------------------------------------------|-----------------------------------------|----------------------------------------------------|-----------------------------------------------------------------|------------------------------------------------------|------------------------------------------------------------------------------------------------------------------------------------------------------------------------------------------------------------------------------------------------------------------------------------------------------|
| Cortes et al. (2022) <sup>7</sup>       | 2015-2019 | Puerto Rico, US                                                        | Cross sectional | General population (≥18 years) | 24,555           | Self-administered questionnaire                                                                                                                           | Hurricane Maria                                             | about 2 years                           | 1-year period prior to exposure                    | General health status, overweight, depression, diabetes         | Logistic regression                                  | No significant elevated risk for worse general health status, overweight, depression, diabetes                                                                                                                                                                                                       |
| Harville et al. (2022) <sup>8</sup>     | 2017-2019 | Florida, US                                                            | Time series     | Pregnant women                 | 436,869          | Federal Emergency Management Agency-designated                                                                                                            | Hurricane Michael                                           | 1 year                                  | 1-year period prior to exposure                    | Preterm birth, low birth weight, and small for gestational age  | Log-binomial regression/ logistic model              | Relative risk for preterm birth (0.96, 95% CI: 0.88, 1.05); for low birth weight (1.19, 95% CI: 1.07, 1.32); for small for gestational age (1.11, 95% CI: 1.01, 1.21)                                                                                                                                |
| Acosta and Irizarry (2022) <sup>9</sup> | 1985-2020 | 4 jurisdictions in US (Puerto Rico, Louisiana, New Jersey and Florida) | Time series     | General population (All Ages)  | NA               | Cyclone landfall time                                                                                                                                     | Six hurricanes (Hugo, Georges, Maria, Katrina, Sandy, Irma) | 12-197 days across different hurricanes | Period prior to cyclone landfall                   | All-cause mortality                                             | Time-series mixed model                              | Excess deaths for Hurricane Hugo (94, 95% CI: 24, 163); for Hurricane Georges (1300, 95% CI: 1040, 1,550); for Hurricane Maria 3280, 95% CI: 2890, 3670); for Hurricane Katrina (1570, 95% CI: 1300, 1830); for Hurricane Sandy (195, 95% CI: 48, 342); for Hurricane Irma (1280, 95% CI: 790, 1760) |
| Hochard et al. (2022) <sup>10</sup>     | 2006-2012 | North Carolina, US                                                     | Cross sectional | Pregnant women                 | > 700,000 births | Hurricane declaration date                                                                                                                                | Hurricane Irene                                             | 40 weeks                                | Births within 5-year period prior to the hurricane | Birth weight, gestation length, preterm birth, low birth weight | Linear (probability) model                           | $\beta$ for birth weight (12.7g, 95% CI: 5.4, 20.0); for gestation lengths (-0.10 weeks, 95% CI: -0.14, -0.07); for low birth weight incidence (0.56, 95% CI: 0.22, 0.90); for preterm birth incidence (0.96, 95% CI: 0.53, 1.38)                                                                    |
| Li et al. (2022) <sup>11</sup>          | 2015-2019 | Guangzhou, China                                                       | Time series     | General population (All Ages)  | 7916             | Cyclone-related windspeed; duration of the tropical cyclone with a level 7 wind circle (the average wind speed within the circle was above 13.9–17.1 m/s) | 9 TCs                                                       | 4 weeks                                 | Non-cyclone days                                   | Dengue                                                          | Quasi-Poisson regression with distributed lag models | Relative risk (2.13, 95% CI: 1.28, 3.56)                                                                                                                                                                                                                                                             |

|                                        |           |                       |                 |                                 |                 |                      |                                          |         |                                                    |                                                                |                                                     |                                                                                                                                                                                                                                                                                                                                                                                                                                                                                                                                                                                                                                                                                |
|----------------------------------------|-----------|-----------------------|-----------------|---------------------------------|-----------------|----------------------|------------------------------------------|---------|----------------------------------------------------|----------------------------------------------------------------|-----------------------------------------------------|--------------------------------------------------------------------------------------------------------------------------------------------------------------------------------------------------------------------------------------------------------------------------------------------------------------------------------------------------------------------------------------------------------------------------------------------------------------------------------------------------------------------------------------------------------------------------------------------------------------------------------------------------------------------------------|
| Parayiwa et al. (2022) <sup>12</sup>   | 2008-2018 | Queensland, Australia | Cross sectional | Pregnant women                  | 647, 634 births | Disaster declaration | 3 TCs (cyclones Yasi, Marcia and Debbie) | NA      | Births in non-affected area                        | Preterm birth, low birth weight, and small for gestational age | Logistic mixed-effects regression model             | Odds ratio for preterm birth associated with cyclone exposure during early pregnancy (1.26, 95% CI: 1.11, 1.43), no significant change for exposure during other trimesters; No significant change for risk of low birth weight associated with cyclone exposure during all trimesters                                                                                                                                                                                                                                                                                                                                                                                         |
| Bell et al. (2021) <sup>13</sup>       | 2004-2012 | US                    | Case-crossover  | General population (≥ 65 years) | 3,629,637       | FEMA-designated      | 8 large-scale hurricanes                 | 30 days | Non-exposure days within the same year of exposure | All-cause hospitalizations                                     | Conditional Poisson regression model                | A 10%-23% increase in admission rate after exposure                                                                                                                                                                                                                                                                                                                                                                                                                                                                                                                                                                                                                            |
| Weinberger et al. (2021) <sup>14</sup> | 2005-2014 | New York City, US     | Time series     | General population (All Ages)   | 34,767,711      | Cyclone hit time     | Hurricane Sandy                          | 7 days  | Non-cyclone days                                   | Cause-specific ED visits                                       | Quasi-Poisson regression with distributed lag model | Relative risks for aged ≥65 years: All-cause ED visits (1.11, 95% CI: 1.07, 1.16); ED visits due to injuries and poisoning (1.19, 95% CI: 1.10, 1.28); respiratory disease (1.35, 95% CI: 1.21, 1.49); cardiovascular disease (1.10, 95% CI: 1.02, 1.19), renal disease (1.44, 95% CI: 1.22, 1.72); skin and soft tissue infections (1.20, 95% CI: 1.03, 1.39); no significant change for gastrointestinal diseases after the storm<br><br>Relative risks for aged 18–64 years: ED visits for renal disease (2.15, 95% CI: 1.79, 2.59); no significant change for the all-cause ED or ED visits due to other causes after the storm<br><br>Relative risks for aged 0–17 years: |

|                                          |           |                              |                 |                                 |            |                                                                                                                                                                |                                  |                |                                                   |                                                                               |                                                         |                                                                                                                                       |
|------------------------------------------|-----------|------------------------------|-----------------|---------------------------------|------------|----------------------------------------------------------------------------------------------------------------------------------------------------------------|----------------------------------|----------------|---------------------------------------------------|-------------------------------------------------------------------------------|---------------------------------------------------------|---------------------------------------------------------------------------------------------------------------------------------------|
|                                          |           |                              |                 |                                 |            |                                                                                                                                                                |                                  |                |                                                   |                                                                               |                                                         | No significant elevated risks for the all-cause ED or cause-specific ED visits                                                        |
| Cowan et al. (2021) <sup>15</sup>        | 2010-2011 | North Carolina, US           | Time series     | General population (All Ages)   | 39,688     | FEMA-designated                                                                                                                                                | Hurricane Irene                  | 30 days        | Same month in previous year                       | Asthma-related ED visits                                                      | Difference in differences with Poisson regression model | No significant change                                                                                                                 |
| McCann-Pineo et al. (2021) <sup>16</sup> | 2013-2016 | New York, US                 | Cross sectional | General population (≥ 18 years) | 1,687      | Self-administered questionnaire                                                                                                                                | Hurricane Sandy                  | 1-4 years      | Participants with lower hurricane exposure scores | Opioid abuse                                                                  | Multinomial logistic regression model                   | Odds ratio for being classified as high risk of opioid abuse (1.09, 95% CI: 1.05, 1.14)                                               |
| Zacher et al. (2021) <sup>17</sup>       | 2003-2018 | New Orleans, US              | Cohort          | Adult women (≥ 18 years)        | 276        | Cyclone hit time                                                                                                                                               | Hurricane Katrina                | 1 year         | 8-month period prior to exposure                  | Physical symptoms (headaches or migraines, back problems, digestive problems) | Logistic regression model                               | No significant change                                                                                                                 |
| Li et al. (2021) <sup>18</sup>           | 2013-2018 | the Pearl River Delta, China | Case-crossover  | General population (All Ages)   | 47,784     | Beaufort scale from the yearbook (from the date of near gale-force wind speed ≥ 28 knots to the date when tropical cyclones left or disappeared in the region) | 20 TCs                           | 9 days         | Same days of week in the same calendar month      | Dengue fever                                                                  | Conditional Poisson regression model                    | Relative risk for dengue fever (1.31, 95% CI: 1.18, 1.45)                                                                             |
| Bozick (2021) <sup>19</sup>              | 2017-2018 | Houston, US                  | Cross sectional | General population (≥ 18 years) | 5,694      | Cyclone hit time                                                                                                                                               | Hurricane Harvey                 | About 6 months | Participants without exposure                     | Days a month of poor physical or mental health                                | Negative binomial regression model                      | An increase of 1.12 days a month of poor physical health and an increase of 1.31 days a month of poor mental health after cyclone     |
| Meir et al. (2021) <sup>20</sup>         | 2004-2008 | five states in US            | Cohort          | Pregnant women (≥ 18 years)     | 451,848    | FEMA-designated                                                                                                                                                | Hurricane Katrina                | About 3 years  | about 1-year period prior to exposure             | Preterm birth, birth weight, miscarriage rate and infant sex ratio            | Generalized estimating equations                        | No significant change                                                                                                                 |
| Parks et al. (2021) <sup>21</sup>        | 1999-2014 | US                           | Case-crossover  | General population (≥ 65 years) | 69,682,674 | Wind field model (maximum sustained windspeeds of gale force or higher ≥ 17.4 m/s)                                                                             | All TCs hit US between 1999–2014 | 7 days         | All non-exposure days                             | Cause-specific hospitalizations                                               | Conditional quasi-Poisson regression model              | Relative (percentage) changes for respiratory diseases (14.2%; 95% CI: 10.9%, 17.9%); infectious and parasitic diseases (4.3%; 95%CI: |

|                                         |           |                        |                |                                 |        |                                                                                    |                       |                |                                                              |                                                                                               |                                       |                                                                                                                                                                                                                                                                                                                                                                                                                                                                                                                                                                                               |
|-----------------------------------------|-----------|------------------------|----------------|---------------------------------|--------|------------------------------------------------------------------------------------|-----------------------|----------------|--------------------------------------------------------------|-----------------------------------------------------------------------------------------------|---------------------------------------|-----------------------------------------------------------------------------------------------------------------------------------------------------------------------------------------------------------------------------------------------------------------------------------------------------------------------------------------------------------------------------------------------------------------------------------------------------------------------------------------------------------------------------------------------------------------------------------------------|
|                                         |           |                        |                |                                 |        |                                                                                    |                       |                |                                                              |                                                                                               |                                       | 1.2%, 8.1%); and injuries (8.7%; 95%CI: 6.0%, 11.8%)                                                                                                                                                                                                                                                                                                                                                                                                                                                                                                                                          |
| Yan et al. (2021) <sup>22</sup>         | 1999-2010 | US                     | Case-crossover | General population (≥ 65 years) | NA     | Wind field model (maximum sustained winds ≥21 m/s)                                 | 74 Atlantic-basin TCs | 7 days         | All non-exposure days                                        | Cardiovascular and respiratory hospitalizations                                               | Generalized linear mixed-effect model | Relative risks for hospitalizations due to cardiovascular diseases (1.03, 95% CI: 1.02, 1.05); acute myocardial infarction (1.05, 95% CI: 1.00, 1.10); heart failure (1.08, 95% CI: 1.04, 1.11); ischemic heart disease (1.03, 95% CI: 1.00, 1.06); no significant change for cerebrovascular disease, heart rhythm disturbance, peripheral vascular disease. Relative risks for hospitalizations due to respiratory hospitalizations (1.16, 95% CI: 1.13, 1.20); asthma (1.20, 95% CI: 1.07, 1.34); COPD (1.31, 95% CI: 1.23, 1.39); respiratory tract infection (1.08, 95% CI: 1.03, 1.12). |
| Nethery et al. (2021) <sup>23</sup>     | 1999-2015 | US                     | Time series    | General population (≥ 65 years) | NA     | Wind field model (maximum sustained windspeeds of gale force or higher ≥ 17.4 m/s) | 53 TCs                | 11 days        | 129-day period prior to exposure                             | All-cause mortality and cardiovascular- and respiratory-related hospitalization               | Machine learning approach             | Average excess rate for respiratory hospitalizations (8.58, 95% CI: 4.34, 11.86); COPD hospitalizations (4.57, 95% CI: 2.13, 6.79); CVD hospitalizations (-5.01, 95% CI: -9.87, -0.30); no significant change for mortality                                                                                                                                                                                                                                                                                                                                                                   |
| de Oliveira et al. (2021) <sup>24</sup> | 2001-2005 | Santa Catarina, Brazil | Cohort         | Newborns                        | 53,006 | Cyclone track (within a 100km buffer)                                              | Hurricane Catarina    | about 9 months | Babies born within a about 16-month period prior to exposure | Birth weight, low birth weight, high birth weight, short gestational length, long gestational | Difference-in-differences             | β for birth weight (-44g, 95% CI: -85, -4); for fetal death rate (16.7, 95% CI: 4.6, 28.9); no significant change for other birth outcomes                                                                                                                                                                                                                                                                                                                                                                                                                                                    |

|                                      |           |                                           |                 |                                 |            |                                                                                                                 |                                                               |                          |                                                         |                                          |                                                           |                                                                                                                                                                                                                                           |
|--------------------------------------|-----------|-------------------------------------------|-----------------|---------------------------------|------------|-----------------------------------------------------------------------------------------------------------------|---------------------------------------------------------------|--------------------------|---------------------------------------------------------|------------------------------------------|-----------------------------------------------------------|-------------------------------------------------------------------------------------------------------------------------------------------------------------------------------------------------------------------------------------------|
|                                      |           |                                           |                 |                                 |            |                                                                                                                 |                                                               |                          |                                                         | length, Apgar score, fetal mortality     |                                                           |                                                                                                                                                                                                                                           |
| Dosa et al. (2020) <sup>25</sup>     | 2015-2017 | Florida, US                               | Cohort          | General population (≥ 65 years) | 123,377    | Cyclone track                                                                                                   | Hurricane Irma                                                | 90 days                  | Participants without exposure                           | All-cause mortality and hospitalizations | General estimation equations                              | Odds ratio for first hospitalization (1.09, 95% CI: 1.05, 1.13); for mortality (1.12, 95% CI: 1.05, 1.18)                                                                                                                                 |
| Kanaoka et al. (2020) <sup>26</sup>  | 2012-2016 | Japan                                     | Case-crossover  | General population (≥ 20 years) | 5,643      | Cyclone landfall time                                                                                           | Six cyclones (maximum surface wind speeds exceeding 34 knots) | 2 days                   | 1-year period prior to exposure                         | Takotsubo syndrome hospitalization       | Conditional Poisson regression model                      | Incidence rate ratio for takotsubo syndrome hospitalization (1.85, 95% CI: 1.07, 3.19)                                                                                                                                                    |
| Sun et al. (2020) <sup>27</sup>      | 1989-2002 | US                                        | Case-crossover  | Pregnant women                  | 19,529,748 | Wind field model (sustained wind speed > 17.2 m/s); cumulative rainfall >100 mm; distance to storm track <60 km | 58 TCs                                                        | 30 days                  | Four randomly selected non-TC days for each county      | Preterm birth                            | Distributed lag log-linear mixed-effects model            | Relative risks for preterm birth (1.04, 95% CI: 1.02, 1.06)                                                                                                                                                                               |
| Schwartz et al. (2019) <sup>28</sup> | 2013-2016 | Manhattan, New York and Long Island, US   | Cross sectional | General population (≥ 18 years) | 2,767      | Self-administered questionnaire                                                                                 | Hurricane Sandy                                               | 32 months                | Participants with smaller number of hurricane exposures | PTSD                                     | Logistic regression model                                 | Odds ratio for likely PTSD symptoms in three study areas (1.25-1.61)                                                                                                                                                                      |
| An et al. (2019) <sup>29</sup>       | 2004-2006 | US                                        | Cross sectional | General population (≥ 18 years) | 70,267     | Level of natural disaster-related damages based on the CoreLogic Hazard Risk Score                              | Hurricane Katrina                                             | 15 months                | 1.5-year period prior to exposure                       | Poor mental health days                  | Difference-in-differences analysis with linear regression | An average of 0.68 increased days of poor mental health                                                                                                                                                                                   |
| Quast et al. (2019) <sup>30</sup>    | 2004-2014 | Louisiana, Mississippi, Texas, Alabam, US | Cohort          | Diabetics (>65 years)           | 340,656    | FEMA-designated                                                                                                 | Hurricane Katrina and Rita                                    | 1 year, more than 9 year | Participants without exposure                           | Cause-specific mortality                 | Conditional logit regression model                        | Odds ratio for all-cause mortality (1.10, 95% CI: 1.08, 1.12) in more than 9 year after cyclone; for nephritis mortality (1.15, 95%CI: 1.10 1.19) in 1 year after cyclone; No significant change for heart disease and diabetes mortality |

|                                          |           |                              |             |                                                      |        |                                                                                                |                  |          |                                  |                                                                       |                                                 |                                                                                                                                                                                                                                                                                                |
|------------------------------------------|-----------|------------------------------|-------------|------------------------------------------------------|--------|------------------------------------------------------------------------------------------------|------------------|----------|----------------------------------|-----------------------------------------------------------------------|-------------------------------------------------|------------------------------------------------------------------------------------------------------------------------------------------------------------------------------------------------------------------------------------------------------------------------------------------------|
| Cruz-Cano and Mead (2019) <sup>31</sup>  | 2008-2017 | Puerto Rico, US              | Time series | General population (All ages)                        | 118    | Cyclone landfall time                                                                          | Hurricane Maria  | 40 days  | 9-year period prior to exposure  | Cause-specific mortality                                              | Auto-regressive integrated moving-average model | Relative risk for all-cause mortality (1.25, 95% CI: 1.13, 1.40); for heart disease mortality (1.29, 95% CI: 1.12, 1.53); for diabetes mortality (1.41, 95% CI: 1.15, 1.84); for Alzheimer's disease mortality (1.32, 95% CI: 1.10, 1.68); for Septicemia mortality (1.70, 95% CI: 1.20, 2.84) |
| Kontoyiannis et al. (2019) <sup>32</sup> | 2016-2018 | Houston, Texas, US           | Time series | Immuno-compromised patients                          | 460    | FEMA-designated                                                                                | Hurricane Harvey | 1 year   | 12-month period before exposure  | Mold infections                                                       | Ordinary least squares regression lines         | No significant increase in hospitalizations due to mold infections                                                                                                                                                                                                                             |
| Lawrence et al. (2019) <sup>33</sup>     | 2007-2014 | New York State, US           | Time series | General population (≥ 65 years)                      | 651858 | FEMA-designated                                                                                | Hurricane Sandy  | 1 year   | 5-year period prior to exposure  | Cardiovascular disease, respiratory disease, injury visits/admissions | Poisson regression model                        | Relative risk for cardiovascular disease (2.01, 95% CI: 2.00, 2.01); for respiratory disease (2.04, 95% CI: 2.04, 2.05); for injury (2.43, 95% CI: 2.43, 2.44)                                                                                                                                 |
| Ekperi et al. (2018) <sup>34</sup>       | 2011-2013 | Eastern US                   | Time series | General population with privately insured (All ages) | NA     | Cyclone landfall time                                                                          | Hurricane Sandy  | 58 weeks | 95-week period prior to exposure | HIV testing rate                                                      | Interrupted time series analyses                | 5%-24% decline for HIV testing rates across areas with different level of impacts                                                                                                                                                                                                              |
| Van Loenhout et al. (2018) <sup>35</sup> | 2013      | Eastern Visayas, Philippines | Cohort      | General population (All ages)                        | 2120   | Cyclone landfall time                                                                          | Typhoon Haiyan   | 3 weeks  | 1-week period prior to exposure  | Cause-specific hospitalizations                                       | Logistic regression model                       | Odds ratio for "hospitalizations for pregnancy, childbirth and the puerperium" (0.4, 95% CI: 0.3, 0.6); "hospitalizations for certain infectious and parasitic diseases" (2.1, 95% CI: 1.2, 3.5); "hospitalizations for respiratory disease" (1.8, 95% CI: 1.0, 3.0)                           |
| Kim et al. (2017) <sup>36</sup>          | 2008-2013 | New Jersey, US               | Time series | General population (≥ 76 years)                      | NA     | Municipality-level score combining electricity outages, residential and commercial damage, and | Hurricane Sandy  | 3 months | 2-year period prior to exposure  | Cause-specific mortality                                              | Negative binomial regression model              | Relative risk for all-cause mortality (1.07, 95% CI: 1.05, 1.10); for cardiovascular mortality (1.06, 95% CI: 1.02, 1.10); for noninfectious                                                                                                                                                   |

|                                      |           |                                                                        |             |                               |         |                                                                                                                                                                                                                              |                                                            |                |                                                                                  |                                                                         |                                                                          |                                                                                                                                                                                                    |
|--------------------------------------|-----------|------------------------------------------------------------------------|-------------|-------------------------------|---------|------------------------------------------------------------------------------------------------------------------------------------------------------------------------------------------------------------------------------|------------------------------------------------------------|----------------|----------------------------------------------------------------------------------|-------------------------------------------------------------------------|--------------------------------------------------------------------------|----------------------------------------------------------------------------------------------------------------------------------------------------------------------------------------------------|
|                                      |           |                                                                        |             |                               |         | emergency assistance                                                                                                                                                                                                         |                                                            |                |                                                                                  |                                                                         |                                                                          | respiratory mortality (1.24, 95% CI: 1.15, 1.33); for infectious disease mortality (1.20, 95% CI: 1.12, 1.29); for unintentional injury-related (1.23, 95% CI: 1.05, 1.44).                        |
| Bromet et al. (2017) <sup>37</sup>   | 2012-2013 | Long Island, US                                                        | Cohort      | Workers in World Trade Center | 870     | Self-administered questionnaire                                                                                                                                                                                              | Hurricane Sandy                                            | 6 months       | Participants who claim to be less affected by the hurricane                      | PTSD, major depressive disorder                                         | Logistic regression model                                                | Odds ratio ranged from 1.77 to 5.38 for PTSD and from 1.58 to 4.13 for major depressive disorder                                                                                                   |
| Grabich et al. (2017) <sup>38</sup>  | 2003-2004 | Florida, US                                                            | Ecological  | Pregnant women                | 382,700 | Cyclone landfall time                                                                                                                                                                                                        | 4 hurricanes (Charley, Frances, Ivan, and Jeanne)          | 3 months       | Pregnant women during the same calendar date over 1-year period prior to cyclone | County-level low birth weight, fetal death, and birth rate              | Difference-in-differences analysis with linear regression                | No significant change                                                                                                                                                                              |
| Zheng et al. (2017) <sup>39</sup>    | 2005-2011 | Southeast China                                                        | Time series | General population (All ages) | NA      | Days of a TC with wind velocity $\geq$ 13.9 m/s passed the city with following meteorological conditions [24h total rainfall ( $\geq$ 25 mm) or gust wind speed ( $\geq$ 13.9 m/s) or maximum wind speed ( $\geq$ 10.8 m/s)] | 65 TCs                                                     | 1 day          | Non-TC day                                                                       | Infectious diseases                                                     | $\chi^2$ test                                                            | Relative risk for water-food transmitted disease (0.23-14.33); for air transmitted disease (0-144.38); for mosquito transmitted disease (0.33-34.38); for contact transmitted disease (0.18-60.00) |
| Schwartz et al. (2017) <sup>40</sup> | 2013-2014 | New York City and Long Island, US                                      | Cohort      | Adults ( $\geq$ 18 years)     | 130     | Self-administered questionnaire                                                                                                                                                                                              | Hurricane Sandy                                            | about 2-3 year | Participants who claim to be less affected by the hurricane                      | Anxiety, depression and PTSD                                            | Logistic regression model                                                | Odds ratio for PTSD (1.6, 95% CI: 1.2, 2.2); no significant change for anxiety or depression                                                                                                       |
| Sharp et al. (2016) <sup>41</sup>    | 2010-2013 | New York, US                                                           | Time series | General population (All ages) | 826,209 | Cyclone hit date and model-estimated storm-surge area                                                                                                                                                                        | Hurricane Sandy                                            | 1 year         | 2-year period prior to exposure                                                  | All-cause hospitalizations, outpatient and ED visits for mental illness | Negative binomial regression model                                       | Odds ratio for mental illness-ED visits (1.10 95% CI: 1.07, 1.13); no significant change for all-cause hospitalization and mental illness-outpatient visits                                        |
| Dresser et al. (2016) <sup>42</sup>  | 1960-2011 | 16 Small, Low-Income Countries in in the Caribbean and Central America | Ecological  | General population (All ages) | NA      | Cyclone track within 200 km of a nation's reference location                                                                                                                                                                 | 149 high-amplitude storms (Saffir-Simpson category 4 or 5) | NA             | All non-exposure period                                                          | Country-level mortality rate                                            | Generalized estimating equations with negative binomial regression model | Excess death per 10,000 people ranged from 0.15-25.93 among countries with different GDP level and cyclones with different amplitudes                                                              |



|                                          |           |                  |                  |                                      |            |                                          |                                                                                                                       |                                                                                |                                                                                                                                   |                                                           |                                                                  |                                                                                                                                                                                                                                  |
|------------------------------------------|-----------|------------------|------------------|--------------------------------------|------------|------------------------------------------|-----------------------------------------------------------------------------------------------------------------------|--------------------------------------------------------------------------------|-----------------------------------------------------------------------------------------------------------------------------------|-----------------------------------------------------------|------------------------------------------------------------------|----------------------------------------------------------------------------------------------------------------------------------------------------------------------------------------------------------------------------------|
| Schwartz et al. (2016) <sup>43</sup>     | 2013-2015 | New York, US     | Cross sectional  | General population (≥ 18 years)      | 407        | Self-administered questionnaire          | Hurricane Sandy                                                                                                       | 1.5-2 years                                                                    | Participants who claim to be less affected by the hurricane                                                                       | Depression, anxiety, PTSD                                 | Logistic regression model                                        | Odds ratio for PTSD (1.26, 95% CI: 1.11, 1.43); no significant change for depression and anxiety                                                                                                                                 |
| Marshall et al. (2016) <sup>44</sup>     | 2009-2013 | New Jersey, US   | Case-crossover   | General population (18-65 years)     | 414,226    | Community hardship index of storm impact | Hurricane Sandy                                                                                                       | 1 year                                                                         | 1-year period prior to exposure                                                                                                   | Work-related injuries                                     | Poisson regression model                                         | No significant change                                                                                                                                                                                                            |
| Deng et al. (2015) <sup>45</sup>         | 2005-2011 | Zhejiang, China  | Case-crossover   | General population (All ages)        | NA         | NA                                       | 3 tropical storms (maximum average windspeed of the cyclone center 17.2 m/s–24.4 m/s); 4 severe typhoons (≥ 41.5 m/s) | 7 days for bacillary dysentery, 14 days for other infectious diarrheal disease | 7 and 14 days before the first onset of case reports for bacillary dysentery and other infectious diarrheal disease, respectively | Infectious diarrhea                                       | Conditional logistic regression model                            | Odds ratio for bacillary dysentery and other infectious diarrhea (ranged from 2.30 - 3.56)                                                                                                                                       |
| Wang et al. (2015) <sup>46</sup>         | 2009      | Guangdong, China | Time series      | General population (All ages)        | 1163       | Cyclone landfall time                    | Typhoon Koppu                                                                                                         | NA                                                                             | Two-weeks period prior to and after the cyclone landing period                                                                    | Infectious diarrhea                                       | None                                                             | No significant change for dysentery, slightly increase for other infectious diarrhea (Rate ratio, 1.10; 95% CI, 1.00, 1.20)                                                                                                      |
| Tian and Guan (2015) <sup>47</sup>       | 2001-2008 | Louisiana, US    | Quasi-experiment | Displaced students in public schools | 681,753    | Evacuee time                             | Hurricane Katrina                                                                                                     | 1 year                                                                         | Non-evacuees                                                                                                                      | Behavioral disorder                                       | Difference-in-differences analysis with linear probability model | 7.3% increase in relative likelihood of any discipline infraction after exposure                                                                                                                                                 |
| Antipova and Curtis (2015) <sup>48</sup> | 1991-1995 | Louisiana, US    | Time series      | Pregnant women                       | 34,622     | Cyclone track with 20 miles buffer       | Hurricane Andrew                                                                                                      | 3 years                                                                        | 10-month period prior to exposure                                                                                                 | Preterm, low birth weight births                          | $\chi^2$ test                                                    | Odds ratio for preterm (1.43, 95% CI: 1.26, 1.62); no significant change for low birth weight                                                                                                                                    |
| Swedel et al. (2014) <sup>49</sup>       | 2007-2012 | New Jersey, US   | Time series      | General population                   | 17,593,658 | Cyclone landfall time                    | Hurricane Sandy                                                                                                       | 1 month                                                                        | 1-year period prior to exposure                                                                                                   | Incidence and mortality of myocardial infarction, strokes | Poisson regression model                                         | Relative risk for myocardial infarction incidence (1.22, 95% CI: 1.16, 1.28); myocardial infarction mortality (1.31, 95% CI: 1.22, 1.41); stroke incidence (1.07, 95% CI: 1.03, 1.11); no significant change in stroke mortality |

|                                       |           |                                     |                 |                                        |           |                                                                      |                                         |          |                                                                                                          |                                                          |                               |                                                                                                                                                                                                                     |
|---------------------------------------|-----------|-------------------------------------|-----------------|----------------------------------------|-----------|----------------------------------------------------------------------|-----------------------------------------|----------|----------------------------------------------------------------------------------------------------------|----------------------------------------------------------|-------------------------------|---------------------------------------------------------------------------------------------------------------------------------------------------------------------------------------------------------------------|
| Kim et al. (2013) <sup>50</sup>       | 2003-2009 | South Korea                         | Time series     | General population (All ages)          | 23,966    | NA                                                                   | 3 typhoons                              | 7 days   | Non-exposure period                                                                                      | All-cause mortality, infectious diarrhea hospitalization | None                          | Relative risk for mortality (1.04, 95% CI: 1.01, 1.07) and for infectious diarrhea (1.07, 95% CI: 1.03, 1.12)                                                                                                       |
| Frahm et al. (2013) <sup>51</sup>     | 2004-2005 | Florida, US                         | Cohort          | Veterans (mean of 59 years)            | 153,511   | Cyclone track                                                        | 13 hurricanes impacted Florida counties | 1 month  | Participants without hurricane exposure                                                                  | Mental health service visits                             | t test                        | 28 % increase in use of mental health services                                                                                                                                                                      |
| Fullerton et al. (2013) <sup>52</sup> | 2004-2005 | Florida, US                         | Cross sectional | Public health workers                  | 2,249     | Cyclone track and Self-administered questionnaire                    | 5 cyclones                              | 9 months | Participants who claim to be less affected by the hurricane                                              | PTSD                                                     | Logistic regression model     | Odds ratio (3.21, 95% CI: 2.04, 5.08)                                                                                                                                                                               |
| Lin et al. (2013) <sup>53</sup>       | 2000-2008 | Taiwan                              | Time series     | General population (All ages)          | 23,906    | Cyclone track                                                        | 22 TCs (typhoons)                       | 5 days   | Non-typhoon days                                                                                         | All-cause ED visits                                      | Linear regression model       | $\beta$ (2.01, 95% CI: 0.62, 3.39)                                                                                                                                                                                  |
| Howard et al. (2012) <sup>54</sup>    | 2001-2005 | Gulf Coast, US                      | Cohort          | Dialysis patients                      | 8,718     | Cyclone hit time                                                     | Hurricane Katrina                       | 1 month  | 4-year period prior to exposure                                                                          | Cause-specific hospitalizations                          | Cox proportional hazard model | Rate ratio for all-cause hospitalization (1.16, 95% CI: 1.05, 1.29); for renal-related hospitalizations (2.53, 95% CI: 2.09, 3.06); no significant change for surgical hospitalizations or medical hospitalizations |
| Mills et al. (2012) <sup>55</sup>     | 2005-2006 | Gulf Coast, US                      | Cross sectional | General population ( $\geq 18$ years)  | 747       | Self-administered questionnaire                                      | Hurricane Katrina                       | 1 year   | NA                                                                                                       | PTSD                                                     | Logistic regression model     | Odds ratio (1.69, 95% CI: 1.22, 2.33)                                                                                                                                                                               |
| Panda et al. (2011) <sup>56</sup>     | 2007-2009 | West Bengal, India                  | Ecological      | General population ( $\leq 55$ years)  | 65,186    | Cyclone hit time                                                     | Cyclone Aila                            | 1 month  | 2-year period prior to exposure                                                                          | Diarrhoea                                                | $\chi^2$ test                 | Odds ratio in in two subdivisions (1.6 and 1.3 respectively; 95% CI 1.52, 1.65 and 1.21, 1.32)                                                                                                                      |
| Dosa et al. (2010) <sup>57</sup>      | 2003-2005 | Louisiana and Mississippi, US       | Ecological      | General population ( $> 65$ years)     | 28,540    | Warning zone at 24 hours before landfall by National Weather Service | Hurricane Katrina                       | 90 days  | Residents residing at the same facilities one year or two year before hurricane exposure (2003 and 2004) | Mortality and hospitalization rate                       | $\chi^2$ test                 | 3% increase for mortality rate, 2.6% increase for hospitalization rate after cyclone                                                                                                                                |
| Zahran et al. (2010) <sup>58</sup>    | 1991–1997 | US                                  | Cohort          | Pregnant women                         | 1,508,927 | Cyclone landfall time                                                | Hurricane Andrew                        | NA       | Participants without hurricane exposure                                                                  | Fetal distress                                           | Logistic regression model     | 27%-46% increased fetal distress risk associated with hurricane exposure during pregnancy                                                                                                                           |
| Kutner et al. (2009) <sup>59</sup>    | 2003-2006 | Louisiana, Mississippi, Alabama, US | Cohort          | Dialysis patients (mean age: 61 years) | 7,269     | Cyclone track                                                        | Hurricane Katrina                       | 6 months | Patients without hurricane exposure                                                                      | All-cause mortality                                      | Cox proportional hazard model | No significant change                                                                                                                                                                                               |

|                                       |           |                                        |                 |                                              |        |                                                                    |                    |                 |                                                             |                                          |                                                           |                                                                                                                                                                |
|---------------------------------------|-----------|----------------------------------------|-----------------|----------------------------------------------|--------|--------------------------------------------------------------------|--------------------|-----------------|-------------------------------------------------------------|------------------------------------------|-----------------------------------------------------------|----------------------------------------------------------------------------------------------------------------------------------------------------------------|
| Burton et al. (2009) <sup>60</sup>    | 2004-2007 | New Orleans, US                        | Cohort          | General population ( $\geq 65$ years)        | 20,612 | Cyclone hit time                                                   | Hurricane Katrina  | 1 year          | 1-year period prior to exposure                             | All-cause mortality and morbidity score  | t test                                                    | No significant change for mortality rate, 12.6% increase for overall morbidity score                                                                           |
| Tees et al. (2009) <sup>61</sup>      | 2006-2007 | New Orleans and Baton Rouge, US        | Cohort          | Pregnant women ( $\geq 18$ years)            | 288    | Self-administered questionnaire                                    | Hurricane Katrina  | 1 year          | Participants who claim to be less affected by the hurricane | Infant temperament                       | Logistic regression model                                 | No significant change                                                                                                                                          |
| Fonseca et al. (2009) <sup>62</sup>   | 2005-2006 | New Orleans, US                        | Cohort          | Individuals with diabetes ( $\geq 18$ years) | 1,795  | Cyclone hit time                                                   | Hurricane Katrina  | 6-16 months     | 6-month period prior to hurricane                           | Level of A1C, blood pressure, and lipids | t test                                                    | 0.1% increase in A1C; 10.5 and 3.9 mmHg increase in SBP and DBP; 6.0 mg/dl increase in LDL; 2.4 mg/dl decrease in HDL; no significant change for triglycerides |
| Anastario et al. (2009) <sup>63</sup> | 2006-2017 | Mississippi, US                        | Cross sectional | Women (mean of 42 years)                     | 420    | Cyclone hit time                                                   | Hurricane Katrina  | 2 years         | 1-year period after exposure                                | Gender-based violence                    | t test                                                    | 3.2% increase in recent gender-based violence prevalence                                                                                                       |
| Harville et al. (2009) <sup>64</sup>  | 2005-2007 | New Orleans and Baton Rouge, US        | Cohort          | Pregnant women ( $\geq 18$ years)            | 292    | Phone interview                                                    | Hurricane Katrina  | 8–10 weeks      | Participants with less experiences of Hurricane             | Depression, PTSD                         | Loglinear/Poisson regression                              | Relative risk for depression (1.77, 95% CI: 1.08, 2.89) and PTSD (3.68, 95% CI: 1.80, 7.52) associated with two or more severe experiences of the hurricanes   |
| Xiong (2008) <sup>65</sup>            | 2006-2007 | Louisiana, US                          | Cohort          | Pregnant women                               | 301    | Self-administered questionnaire                                    | Hurricane Katrina  | about 21 months | Participants who claim to be less affected by the hurricane | Low birth weight, preterm birth          | Logistic regression model                                 | Odds ratio for low birth weight: (3.3, 95% CI: 1.13, 9.89); preterm birth: (2.3, 95% CI: 0.82, 6.38)                                                           |
| Kessler et al. (2006) <sup>66</sup>   | 2001-2005 | Alabama, Louisiana and Mississippi, US | Cross sectional | General population ( $> 18$ years)           | 1,869  | Cyclone hit time                                                   | Hurricane Katrina  | 1 month         | Patients without hurricane exposure                         | Mental health, suicidality               | Logistic regression model                                 | Odds ratio for any mental illness (2.4, 95% CI: 1.8–3.2); no significant change in suicide rates                                                               |
| Fried et al. (2005) <sup>67</sup>     | 1998-2000 | North Carolina, US                     | Time series     | General population (All ages)                | NA     | FEMA-designated                                                    | Hurricane Floyd    | 1 year          | 14 months prior to exposure                                 | Mental health visits                     | Difference-in-differences analysis with linear regression | $\beta$ for number of outpatient visits to psychologists/or licensed clinical social workers (0.0007, SE: 0.00015)                                             |
| Keenan et al. (2004) <sup>68</sup>    | 1998-2001 | North Carolina, US                     | Ecological      | Children ( $\leq 24$ months)                 | 245    | Federal disaster declaration together with drowning-related deaths | Hurricane Floyd    | 6 months        | 1-year period prior to exposure                             | Traumatic brain injury                   | Poisson regression model                                  | Rate ratio for inflicted traumatic brain injury (5.1, 95% CI: 1.3, 20.4), non-inflicted traumatic brain injury (10.7, 95% CI: 2.0, 59.4)                       |
| Sanders et al. (1999) <sup>69</sup>   | 1996      | Puerto Rico, US                        | Case-control    | Dengue-negative                              | 142    | Cyclone hit time                                                   | Hurricane Hortense | 24 days         | 34 days prior to exposure                                   | Leptospirosis                            | None                                                      | Relative risk (4.4, 95% CI: 1.6, 12.4)                                                                                                                         |

|                                              |           |                       |                    |                                                |       |                                    |                 |         |                                                                      |                                                                         |                                 |                                                                                                                                                                                              |
|----------------------------------------------|-----------|-----------------------|--------------------|------------------------------------------------|-------|------------------------------------|-----------------|---------|----------------------------------------------------------------------|-------------------------------------------------------------------------|---------------------------------|----------------------------------------------------------------------------------------------------------------------------------------------------------------------------------------------|
|                                              |           |                       |                    | patients<br>(13-64<br>years)                   |       |                                    |                 |         |                                                                      |                                                                         |                                 |                                                                                                                                                                                              |
| Hendrickson et al.<br>(1997) <sup>70</sup>   | 1992      | Kauai, US             | Time series        | General<br>population<br>(All ages)            | 1,815 | Cyclone hit time                   | Hurricane Iniki | 2 weeks | 2-week prior to<br>exposure                                          | Injury,<br>cardiovascular<br>and asthma-<br>related physician<br>visits | None                            | Relative risk for injury<br>(6.86, 95% CI: 5.98,<br>7.87); for cardiovascular<br>complaints (2.73, 95%<br>CI: 1.51, 4.94); for<br>asthma (2.81, 95% CI:<br>1.93, 4.09)                       |
| Hendrickson and<br>Vogt (1996) <sup>71</sup> | 1987-1992 | Kauai, US             | Time series        | General<br>population<br>(All ages)            | 736   | Cyclone hit time                   | Hurricane Iniki | 1 year  | 5-year period prior<br>to exposure                                   | Cause-specific<br>mortality                                             | None                            | Relative risk for diabetes<br>mortality (2.61, 95% CI:<br>1.44, 4.74); no significant<br>change for mortality due<br>to heart disease, stroke,<br>cancer, injury and<br>respiratory diseases |
| Garrison et al.<br>(1993) <sup>72</sup>      | 1990      | South<br>Carolina, US | Cross<br>sectional | High<br>school<br>students<br>(11-17<br>years) | 1,264 | Self-administered<br>questionnaire | Hurricane Hugo  | 1 year  | Participants who<br>claim to be less<br>affected by the<br>hurricane | PTSD                                                                    | Logistic<br>regression<br>model | Odds ratio (1.26, 95% CI:<br>1.13, 1.41)                                                                                                                                                     |

Abbreviations: A1C, glycemic control; CI, confidence interval; COPD, chronic obstructive pulmonary disease; CrI, credible interval; DBP, diastolic blood pressure; ED, emergency department; FEMA, Federal Emergency Management Agency; HDL, high-density lipoprotein; LDL, low-density lipoprotein; NA, not available/not applicable; PTSD, post-traumatic stress disorder; SBP, systolic blood pressure; TC, tropical cyclone.

\*Model used in the study to derive the effect estimates

**Table S4:** Heat map for risk of bias rating and quality rating for the included studies

| Study                                    | Risk of Bias        |                    |                  |                |                          |                          |                      |                      |
|------------------------------------------|---------------------|--------------------|------------------|----------------|--------------------------|--------------------------|----------------------|----------------------|
|                                          | Key Criteria        |                    |                  | Other Criteria |                          |                          |                      |                      |
|                                          | Exposure assessment | Outcome assessment | Confounding bias | Selection bias | Attrition/exclusion bias | Selective reporting bias | Conflict of interest | Other source of bias |
| Begum et al. (2022) <sup>2</sup>         | 2                   | 1                  | 2                | 3              | 2                        | 2                        | 2                    | 2                    |
| Parks et al. (2022) <sup>3</sup>         | 2                   | 1                  | 1                | 1              | 2                        | 1                        | 3                    | 2                    |
| Bell et al. (2022) <sup>4</sup>          | 3                   | 1                  | 2                | 3              | 2                        | 3                        | 1                    | 2                    |
| Quist et al. (2022) <sup>5</sup>         | 3                   | 1                  | 2                | 2              | 2                        | 1                        | 2                    | 1                    |
| Sands et al. (2022) <sup>6</sup>         | 3                   | 1                  | 2                | 2              | 1                        | 3                        | 1                    | 2                    |
| Cortes et al. (2022) <sup>7</sup>        | 2                   | 3                  | 2                | 3              | 2                        | 3                        | 1                    | 2                    |
| Harville et al. (2022) <sup>8</sup>      | 2                   | 1                  | 2                | 1              | 2                        | 2                        | 1                    | 2                    |
| Acosta and Irizarry (2022) <sup>9</sup>  | 2                   | 1                  | 1                | 1              | 1                        | 1                        | 1                    | 1                    |
| Hochard et al. (2022) <sup>10</sup>      | 3                   | 1                  | 2                | 1              | 1                        | 2                        | 1                    | 2                    |
| Li et al. (2022) <sup>11</sup>           | 2                   | 1                  | 2                | 1              | 2                        | 1                        | 1                    | 1                    |
| Parayiwa et al. (2022) <sup>12</sup>     | 3                   | 1                  | 2                | 1              | 2                        | 2                        | 1                    | 2                    |
| Bell et al. (2021) <sup>13</sup>         | 3                   | 1                  | 2                | 3              | 2                        | 1                        | 1                    | 2                    |
| Weinberger et al. (2021) <sup>14</sup>   | 2                   | 1                  | 2                | 1              | 2                        | 2                        | 3                    | 1                    |
| Cowan et al. (2021) <sup>15</sup>        | 2                   | 1                  | 2                | 1              | 2                        | 1                        | 3                    | 2                    |
| McCann-Pineo et al. (2021) <sup>16</sup> | 2                   | 2                  | 3                | 3              | 1                        | 1                        | 1                    | 3                    |
| Zacher et al. (2021) <sup>17</sup>       | 3                   | 2                  | 1                | 4              | 1                        | 2                        | 1                    | 2                    |
| Li et al. (2021) <sup>18</sup>           | 2                   | 1                  | 2                | 1              | 2                        | 1                        | 1                    | 2                    |
| Bozick (2021) <sup>19</sup>              | 2                   | 3                  | 2                | 3              | 1                        | 2                        | 1                    | 2                    |
| Meir et al. (2021) <sup>20</sup>         | 3                   | 2                  | 3                | 2              | 2                        | 1                        | 1                    | 2                    |

|                                          |   |   |   |   |   |   |   |   |
|------------------------------------------|---|---|---|---|---|---|---|---|
| Parks et al. (2021) <sup>21</sup>        | 1 | 1 | 2 | 1 | 2 | 1 | 1 | 1 |
| Yan et al. (2021) <sup>22</sup>          | 1 | 1 | 2 | 1 | 2 | 1 | 1 | 1 |
| Nethery et al. (2021) <sup>23</sup>      | 2 | 1 | 2 | 1 | 1 | 2 | 1 | 2 |
| de Oliveira et al. (2021) <sup>24</sup>  | 3 | 1 | 2 | 1 | 2 | 2 | 3 | 2 |
| Dosa et al. (2020) <sup>25</sup>         | 3 | 1 | 2 | 1 | 1 | 2 | 3 | 2 |
| Kanaoka et al. (2020) <sup>26</sup>      | 2 | 1 | 2 | 1 | 3 | 1 | 1 | 2 |
| Sun et al. (2020) <sup>27</sup>          | 1 | 1 | 2 | 1 | 2 | 1 | 3 | 1 |
| Schwartz et al. (2019) <sup>28</sup>     | 2 | 1 | 1 | 3 | 2 | 1 | 3 | 2 |
| An et al. (2019) <sup>29</sup>           | 3 | 1 | 1 | 2 | 3 | 2 | 1 | 2 |
| Quast et al. (2019) <sup>30</sup>        | 3 | 1 | 2 | 2 | 3 | 3 | 1 | 2 |
| Cruz-Cano and Mead (2019) <sup>31</sup>  | 2 | 1 | 2 | 1 | 2 | 3 | 1 | 2 |
| Kontoyiannis et al. (2019) <sup>32</sup> | 2 | 1 | 3 | 1 | 2 | 1 | 3 | 3 |
| Lawrence et al. (2019) <sup>33</sup>     | 2 | 1 | 2 | 1 | 2 | 2 | 1 | 2 |
| Ekperi et al. (2018) <sup>34</sup>       | 2 | 2 | 2 | 3 | 2 | 1 | 1 | 1 |
| Van Loenhout et al. (2018) <sup>35</sup> | 3 | 1 | 3 | 1 | 2 | 1 | 1 | 2 |
| Kim et al. (2017) <sup>36</sup>          | 2 | 1 | 2 | 1 | 2 | 1 | 3 | 2 |
| Bromet et al. (2017) <sup>37</sup>       | 2 | 1 | 1 | 1 | 2 | 1 | 3 | 2 |
| Grabich et al. (2017) <sup>38</sup>      | 3 | 1 | 2 | 1 | 1 | 3 | 3 | 2 |
| Zheng et al. (2017) <sup>39</sup>        | 2 | 1 | 4 | 1 | 2 | 1 | 1 | 3 |
| Schwartz et al. (2017) <sup>40</sup>     | 2 | 1 | 1 | 3 | 2 | 1 | 1 | 2 |
| Sharp et al. (2016) <sup>41</sup>        | 2 | 1 | 2 | 1 | 1 | 2 | 3 | 2 |
| Dresser et al. (2016) <sup>42</sup>      | 3 | 2 | 2 | 1 | 2 | 1 | 3 | 2 |
| Schwartz et al. (2016) <sup>43</sup>     | 2 | 2 | 1 | 3 | 1 | 1 | 3 | 2 |

|                                          |   |   |   |   |   |   |   |   |
|------------------------------------------|---|---|---|---|---|---|---|---|
| Marshall et al. (2016) <sup>44</sup>     | 2 | 1 | 2 | 2 | 2 | 1 | 3 | 2 |
| Deng et al. (2015) <sup>45</sup>         | 2 | 1 | 2 | 1 | 2 | 1 | 1 | 2 |
| Wang et al. (2015) <sup>46</sup>         | 2 | 1 | 3 | 1 | 2 | 1 | 3 | 3 |
| Tian and Guan (2015) <sup>47</sup>       | 3 | 1 | 2 | 1 | 2 | 1 | 1 | 2 |
| Antipova and Curtis (2015) <sup>48</sup> | 2 | 1 | 4 | 1 | 2 | 1 | 3 | 3 |
| Swerdel et al. (2014) <sup>49</sup>      | 2 | 1 | 2 | 2 | 2 | 1 | 1 | 2 |
| Kim et al. (2013) <sup>50</sup>          | 3 | 1 | 4 | 2 | 2 | 2 | 1 | 2 |
| Frahm et al. (2013) <sup>51</sup>        | 3 | 1 | 3 | 1 | 2 | 1 | 3 | 3 |
| Fullerton et al. (2013) <sup>52</sup>    | 2 | 1 | 1 | 1 | 2 | 2 | 1 | 1 |
| Lin et al. (2013) <sup>53</sup>          | 3 | 1 | 2 | 1 | 2 | 1 | 3 | 2 |
| Howard et al. (2012) <sup>54</sup>       | 2 | 1 | 2 | 3 | 2 | 1 | 3 | 2 |
| Mills et al. (2012) <sup>55</sup>        | 2 | 2 | 2 | 2 | 2 | 1 | 3 | 2 |
| Panda et al. (2011) <sup>56</sup>        | 2 | 1 | 3 | 1 | 1 | 1 | 3 | 3 |
| Dosa et al. (2010) <sup>57</sup>         | 2 | 1 | 3 | 1 | 1 | 1 | 1 | 3 |
| Zahrn et al. (2010) <sup>58</sup>        | 3 | 2 | 1 | 2 | 2 | 1 | 3 | 2 |
| Kutner et al. (2009) <sup>59</sup>       | 3 | 2 | 1 | 2 | 2 | 1 | 1 | 2 |
| Burton et al. (2009) <sup>60</sup>       | 3 | 1 | 4 | 2 | 2 | 1 | 1 | 3 |
| Tees et al. (2009) <sup>61</sup>         | 2 | 1 | 2 | 2 | 3 | 1 | 1 | 2 |
| Fonseca et al. (2009) <sup>62</sup>      | 3 | 2 | 4 | 1 | 1 | 2 | 1 | 3 |
| Anastario et al. (2009) <sup>63</sup>    | 3 | 2 | 4 | 2 | 3 | 1 | 1 | 3 |
| Harville et al. (2009) <sup>64</sup>     | 2 | 2 | 2 | 3 | 3 | 1 | 1 | 2 |
| Xiong (2008) <sup>65</sup>               | 2 | 2 | 2 | 3 | 1 | 1 | 3 | 2 |
| Kessler et al. (2006) <sup>66</sup>      | 3 | 2 | 4 | 3 | 3 | 1 | 1 | 2 |

|                                           |   |   |   |   |   |   |   |   |
|-------------------------------------------|---|---|---|---|---|---|---|---|
| Fried et al. (2005) <sup>67</sup>         | 2 | 2 | 2 | 1 | 1 | 1 | 3 | 2 |
| Keenan et al. (2004) <sup>68</sup>        | 2 | 1 | 2 | 2 | 1 | 1 | 3 | 2 |
| Sanders et al. (1999) <sup>69</sup>       | 3 | 1 | 4 | 2 | 1 | 1 | 3 | 3 |
| Hendrickson et al. (1997) <sup>70</sup>   | 2 | 1 | 3 | 2 | 2 | 2 | 3 | 3 |
| Hendrickson and Vogt (1996) <sup>71</sup> | 2 | 1 | 4 | 1 | 2 | 2 | 3 | 3 |
| Garrison et al. (1993) <sup>72</sup>      | 2 | 2 | 2 | 3 | 1 | 1 | 3 | 2 |

**Risk of bias rating**

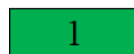

Low

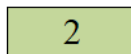

Probably low

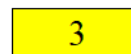

Probably high

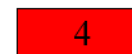

High

Note: Risk of bias assessment was conducted for each study using adapted criteria based on the National Institutes of Environmental Health Sciences National Toxicology Program Office of Health Assessment and Translation (OHAT) tool<sup>1</sup>. Each of domain was evaluated as “low,” “probably low,” “probably high,” or “high” risk according to specific criteria. See Table S2 for more information on risk of bias ratings.



**Table S5:** Details of risk of bias assessment for included studies

| Study                            | Risk of Bias ratings, reason                                                                                                                                                                                                                                               |                                                                                                          |                                                                                                                                                                                                    |                                                                                                                                                                                                                                                                                                                                                                                     |                                                                                                                                                          |                                                                                                                                                                                                                                                      |                                                                                |                                                                                                                                                                                                                      |
|----------------------------------|----------------------------------------------------------------------------------------------------------------------------------------------------------------------------------------------------------------------------------------------------------------------------|----------------------------------------------------------------------------------------------------------|----------------------------------------------------------------------------------------------------------------------------------------------------------------------------------------------------|-------------------------------------------------------------------------------------------------------------------------------------------------------------------------------------------------------------------------------------------------------------------------------------------------------------------------------------------------------------------------------------|----------------------------------------------------------------------------------------------------------------------------------------------------------|------------------------------------------------------------------------------------------------------------------------------------------------------------------------------------------------------------------------------------------------------|--------------------------------------------------------------------------------|----------------------------------------------------------------------------------------------------------------------------------------------------------------------------------------------------------------------|
|                                  | Key Criteria                                                                                                                                                                                                                                                               |                                                                                                          |                                                                                                                                                                                                    | Other Criteria                                                                                                                                                                                                                                                                                                                                                                      |                                                                                                                                                          |                                                                                                                                                                                                                                                      |                                                                                |                                                                                                                                                                                                                      |
|                                  | Exposure assessment                                                                                                                                                                                                                                                        | Outcome assessment                                                                                       | Confounding bias                                                                                                                                                                                   | Selection bias                                                                                                                                                                                                                                                                                                                                                                      | Attrition/exclusion bias                                                                                                                                 | Selective reporting bias                                                                                                                                                                                                                             | Conflict of interest                                                           | Other source of bias                                                                                                                                                                                                 |
| Begum et al. (2022) <sup>2</sup> | Probably low<br><br>Utilized a hurricane period designated by the FEMA to define the cyclone exposure period for the study area and accounted for the persistent exposure, but did not account for the time-varying cyclone exposure                                       | Low<br><br>Outcome data was obtained from local authorities and defined by standard ICD codes            | Probably low<br><br>Accounted for variables of long-time trend, weekday, weekend, holiday, month, and year in the time-see, but not public holiday                                                 | Probably high<br><br>Included all ED and hospitalizations for mental health issues of older adults in Hurricane Sandy-affected New York State counties, but was not able to adjust for duplicate cases or repeat admissions due to a lack of personal identifiers and only included severe cases while the study's aim was on mental health effects associated with Hurricane Sandy | Probably low<br><br>No sufficient information to evaluate the completeness of the outcome data, but the large sample size suggested a potential low risk | Probably low<br><br>Reported a series of outcomes of self-selected mental health subtypes                                                                                                                                                            | Probably low<br><br>Declared no known competing financial interests            | Probably low<br><br>Time-stratified Poisson regression model was used. Did not test the robustness by sensitivity analysis. No study protocol                                                                        |
| Parks et al. (2022) <sup>3</sup> | Probably low<br><br>Exposure assessment was based on high-resolution wind field model that could account for the persistent and time-varying cyclone exposures, but monthly exposures were used                                                                            | Low<br><br>National mortality data in the US data was obtained and outcomes were defined by ICD codes    | Low<br><br>Non-time-varying confounding factors across regions like socioeconomic status, long-term trend, seasonality and temperature were controlled by modelling strategy and a matching design | Low<br><br>Included 33.6 million deaths in 1206 counties across US that experienced tropical cyclones from 1988-2018                                                                                                                                                                                                                                                                | Probably low<br><br>No sufficient information to evaluate the completeness of the outcome data, but the large sample size suggested a potential low risk | Low<br><br>Causes of death were classified into 7 categories that cover all types of death causes, and the results of all of these categories were reported except the invalid category of "other causes" due to the diverse causes in this category | Probably high<br><br>Declared potential conflict of interests for some authors | Probably low<br><br>Bayesian conditional quasi-Poisson model was used and the robustness was tested by a series of sensitivity analysis. Inadequate information provided to judge the compliance with study protocol |
| Bell et al. (2022) <sup>4</sup>  | Probably high<br><br>The cyclone exposure assessment for the study area was only based on a static point-in-time estimate of cyclone hit date at the county level, which did not consider the different length and strength across cyclones, nor did account for the time- | Low<br><br>Hospitalization data was obtained official authorities and outcomes were defined by ICD codes | Probably low<br><br>Temporally invariant confounders such as gender and age were controlled for by a self-matched design                                                                           | Probably high<br><br>The collected hospitalization data was limited to fee-for-service Medicare beneficiaries aged 65 years and older, Older Americans who are enrolled in Medicare Advantage plans who generally have better                                                                                                                                                       | Probably low<br><br>No sufficient information to evaluate the completeness of the outcome data, but the large sample size suggested a potential low risk | Probably high<br><br>Cause-specific hospitalization data was collected, but only four hospitalization outcomes were studied (all-cause hospitalizations and                                                                                          | Low<br><br>Declared no competing financial interests                           | Probably low<br><br>Common conditional Poisson model was used and the robustness was tested by a series of sensitivity analysis. No study protocol                                                                   |

|                                   |                                                                                                                                                                                                                                                                                                                                                                                                                                          |                                                                                                                                                                                                           |                                                                                                                                                                                         |                                                                                                                                                                       |                                                                                                                                                          |                                                                                                                   |                                                                     |                                                                                                                                                                    |
|-----------------------------------|------------------------------------------------------------------------------------------------------------------------------------------------------------------------------------------------------------------------------------------------------------------------------------------------------------------------------------------------------------------------------------------------------------------------------------------|-----------------------------------------------------------------------------------------------------------------------------------------------------------------------------------------------------------|-----------------------------------------------------------------------------------------------------------------------------------------------------------------------------------------|-----------------------------------------------------------------------------------------------------------------------------------------------------------------------|----------------------------------------------------------------------------------------------------------------------------------------------------------|-------------------------------------------------------------------------------------------------------------------|---------------------------------------------------------------------|--------------------------------------------------------------------------------------------------------------------------------------------------------------------|
|                                   | varying exposures                                                                                                                                                                                                                                                                                                                                                                                                                        |                                                                                                                                                                                                           |                                                                                                                                                                                         | health outcomes were excluded                                                                                                                                         |                                                                                                                                                          | hospitalizations for diabetes, COPD, and congestive heart failure)                                                |                                                                     |                                                                                                                                                                    |
| Quist et al. (2022) <sup>5</sup>  | Probably high<br><br>The cyclone exposure for the study area was assessed only based on a static point-in-time estimate of cyclone-related flood extent, which did not consider cyclone end date, nor did account for the individual persistent and time-varying cyclone exposures. Additionally, the ZIP code of the billing address of each participant was used to estimate cyclone exposure, which do not identify the ED's location | Low<br><br>Data was obtained from a public health surveillance system containing records of all civilian ED visits to hospitals in North Carolina and the study outcome was defined by standard ICD codes | Probably low<br><br>Temporally invariant and variant confounders such as overall sociodemographic factors, healthcare access, and rurality were controlled for by a self-matched design | Probably low<br><br>Included all ED visits for gastrointestinal illness among all residents in North Carolina, hospitalization and other data types were not included | Probably low<br><br>No sufficient information to evaluate the completeness of the outcome data, but the large sample size suggested a potential low risk | Low<br><br>Focused on ED visits for acute gastrointestinal illness and report all relevant findings               | Probably low<br><br>Declared no known competing financial interests | Low<br><br>Controlled interrupted time series model was used and a series of sensitivity analyses were used to test the robustness. No study protocol              |
| Sands et al. (2022) <sup>6</sup>  | Probably high<br><br>The cyclone exposure for each individual was assessed based on a static point-in-time estimate of cyclone impacts reflected by storm surge intensity and number of damaged houses, which may not account for the different length and strength of cyclone exposure across individuals accurately, nor did consider the time-varying exposure                                                                        | Low<br><br>Outcome and diagnosis dates were derived from the Medicare data                                                                                                                                | Probably low<br><br>Included age, sex, marital status, pre-hurricane diagnosis of depression, number of comorbidities, BMI, fear and distress in the model                              | Probably low<br><br>Part of the participants without returned questionnaire or valid answers were excluded                                                            | Low<br><br>No outcome data was excluded inappropriately                                                                                                  | Probably high<br><br>Four chronic disease outcomes were selected from the Medicare data and included in the study | Low<br><br>Declared no competing financial interests                | Probably low<br><br>Cox proportional hazard models was used and test the robustness by a series of sensitivity analyses on different subsamples. No study protocol |
| Cortes et al. (2022) <sup>7</sup> | Probably low<br><br>Exposure assessment was based on questionnaire collected from each individual                                                                                                                                                                                                                                                                                                                                        | Probably high<br><br>Outcomes were assessed based on self-reported questionnaire without a valid diagnosis                                                                                                | Probably low<br><br>Included age, sex, race, education, employment, income, marital status in the model                                                                                 | Probably high<br><br>Included a representative sample of resident adults in Puerto Rico, but the response rates were relatively low (about 50%)                       | Probably low<br><br>No sufficient information to evaluate the completeness of the outcome data, but the large sample size suggested a potential low risk | Probably high<br><br>Part of the measured outcomes were included in the study                                     | Low<br><br>Declared no competing financial interests                | Probably low<br><br>Common logistic regression was applied test the robustness by a series of sensitivity analysis on different subsamples. No study protocol      |

|                                         |                                                                                                                                                                                                                                                                                                                                                |                                                                                                                                     |                                                                                                                                                         |                                                                                                                           |                                                                                                                                                          |                                                                                                                                                     |                                                      |                                                                                                                                                                                                                                     |
|-----------------------------------------|------------------------------------------------------------------------------------------------------------------------------------------------------------------------------------------------------------------------------------------------------------------------------------------------------------------------------------------------|-------------------------------------------------------------------------------------------------------------------------------------|---------------------------------------------------------------------------------------------------------------------------------------------------------|---------------------------------------------------------------------------------------------------------------------------|----------------------------------------------------------------------------------------------------------------------------------------------------------|-----------------------------------------------------------------------------------------------------------------------------------------------------|------------------------------------------------------|-------------------------------------------------------------------------------------------------------------------------------------------------------------------------------------------------------------------------------------|
| Harville et al. (2022) <sup>8</sup>     | Probably low<br><br>The exposed period for the study area was defined as 12 months after the Hurricane Michael hit date and unexposed period was defined as the 12 months before the Hurricane Michael hit date, while did account for time-varying cyclone exposures.                                                                         | Low<br><br>Outcome data were derived from the local authorities and were defined based on well-established standard                 | Probably low<br><br>Included maternal age, race, education, and whether enrolled in the special supplemental nutrition program in the model             | Low<br><br>Included all births from the state of Florida occurring in the year before and after the date of the hurricane | Probably low<br><br>No sufficient information to evaluate the completeness of the outcome data, but the large sample size suggested a potential low risk | Probably low<br><br>Main adverse birth outcomes including preterm birth, low birth weight, and small for gestational age were included and reported | Low<br><br>Declared no competing financial interests | Probably low<br><br>Common log-binomial regression/logistic models were applied, and the robustness was tested by a series of sensitivity analysis on different set of adjusted confounders. No study protocol                      |
| Acosta and Irizarry (2022) <sup>9</sup> | Probably low<br><br>Exposure assessment was based on high-resolution wind field model that could account for the persistent and time-varying cyclone exposures, but only used cyclone start date                                                                                                                                               | Low<br><br>Mortality data was obtained from official authorities and all-cause mortality was used as the outcome                    | Low<br><br>Adjusted a series of confounders including age, secular trends, seasonal and day of the week effects, population size, and natural variation | Low<br><br>All mortality data in the study areas was obtained during the study period                                     | Low<br><br>No outcome data was excluded inappropriately                                                                                                  | Low<br><br>Focused on all-cause mortality and reported all relevant findings                                                                        | Low<br><br>Declared no competing financial interests | Low<br><br>Advanced model with high statistical power was applied, complemented with a series of simulation analyses to test the robustness. No study protocol                                                                      |
| Hochard et al. (2022) <sup>10</sup>     | Probably high<br><br>The cyclone exposure for each individual was assessed based on a static point-in-time estimate of cyclone impacts as reflected by cyclone-related damage level, which may not account for the different length and strength of cyclone exposure across individuals accurately, nor did consider the time-varying exposure | Low<br><br>Birth records were derived from the local authorities and were defined based on well-established standard                | Probably low<br><br>Accounted for local neighbourhood characteristics, long-term trend and seasonality effects in the model                             | Low<br><br>All officially recorded births in North Carolina was obtained for the study period                             | Low<br><br>No outcome data was excluded inappropriately                                                                                                  | Probably low<br><br>Main adverse birth outcomes including preterm birth and low birth weight were included and reported                             | Low<br><br>Declared no competing financial interests | Probably low<br><br>Linear (probability) model was applied to assess the treatment effects of cyclone exposure, complemented with a series of sensitivity analyses to test the robustness. No study protocol                        |
| Li et al. (2022) <sup>11</sup>          | Probably low<br><br>Continuous cyclone exposure was assessed by including the information on the generation and disappearance date, path, landing location, and wind speed of the cyclones to account for the persistent and time-varying cyclone exposures. However, the exposure level was at the centroid of the cyclone and                | Low<br><br>Dengue cases were obtained from the official surveillance system and were diagnosed by professional medical institutions | Probably low<br><br>Adjusted long-term trend, seasonality, temperature, cumulative precipitation and average relative humidity                          | Low<br><br>All officially recorded dengue cases in Guangdong was obtained for the study period                            | Probably low<br><br>No sufficient information to evaluate the completeness of the outcome data, but the large sample size suggested a potential low risk | Low<br><br>Focused on dengue incidence and reported all relevant findings                                                                           | Low<br><br>Declared no competing financial interests | Low<br><br>Utilized well-established and standard time-series analysis with quasi-Poisson generalized linear model combined with a distributed lag non-linear model, complemented with a series of sensitivity analyses to test the |

|                                        |                                                                                                                                                                                                                                                                                                                                                                                      |                                                                                                                         |                                                                                                                                                                                                           |                                                                                                                                                                                                                                                             |                                                                                                                                                          |                                                                                                                                                     |                                                                                |                                                                                                                                                                                                                                                                                   |
|----------------------------------------|--------------------------------------------------------------------------------------------------------------------------------------------------------------------------------------------------------------------------------------------------------------------------------------------------------------------------------------------------------------------------------------|-------------------------------------------------------------------------------------------------------------------------|-----------------------------------------------------------------------------------------------------------------------------------------------------------------------------------------------------------|-------------------------------------------------------------------------------------------------------------------------------------------------------------------------------------------------------------------------------------------------------------|----------------------------------------------------------------------------------------------------------------------------------------------------------|-----------------------------------------------------------------------------------------------------------------------------------------------------|--------------------------------------------------------------------------------|-----------------------------------------------------------------------------------------------------------------------------------------------------------------------------------------------------------------------------------------------------------------------------------|
|                                        | no wind field model was applied to quantify the exposure level at each location                                                                                                                                                                                                                                                                                                      |                                                                                                                         |                                                                                                                                                                                                           |                                                                                                                                                                                                                                                             |                                                                                                                                                          |                                                                                                                                                     |                                                                                | robustness. No study protocol                                                                                                                                                                                                                                                     |
| Parayiwa et al. (2022) <sup>12</sup>   | Probably high<br><br>The cyclone exposure for each individual was assessed based on a static point-in-time estimate of cyclone impacts reflected by damage level, which did not account for the different strength and length across cyclones and exposure level and length across individuals. Additionally, the exposure was assessed at large government-based spatial unit level | Low<br><br>Birth records were derived from the local authorities and were defined based on well-established standard    | Probably low<br><br>Adjusted maternal age, marital status, maternal identification, infant sex, smoking during pregnancy, socioeconomic status, maternal country of birth, remoteness and season of birth | Low<br><br>All officially recorded births in Queensland was obtained for the study period                                                                                                                                                                   | Probably low<br><br>Cases were removed if the mother was not a usual resident of Queensland                                                              | Probably low<br><br>Main adverse birth outcomes including preterm birth, low birth weight, and small for gestational age were included and reported | Low<br><br>Declared no competing financial interests                           | Probably low<br><br>Logistic mixed-effects regression model was applied to assess the treatment effects of cyclone exposure, complemented with a series of secondary analyses to test the robustness. Inadequate information provided to judge the compliance with study protocol |
| Bell et al. (2021) <sup>13</sup>       | Probably high<br><br>The cyclone exposure was assessed based on a static point-in-time estimate of cyclone hit date, which did not account for the different strength and length across cyclones                                                                                                                                                                                     | Low<br><br>Hospitalization data was obtained official authorities and all-cause hospitalization was used as the outcome | Probably low<br><br>Temporally invariant confounders such as gender, and age were controlled for by a self-matched design                                                                                 | Probably high<br><br>The collected hospitalization data was limited to fee-for-service Medicare beneficiaries aged 65 years and older, Older Americans who are enrolled in Medicare Advantage plans who generally have better health outcomes were excluded | Probably low<br><br>No sufficient information to evaluate the completeness of the outcome data, but the large sample size suggested a potential low risk | Low<br><br>Focused on all-cause hospitalizations and reported all relevant findings                                                                 | Low<br><br>Declared no competing financial interests                           | Probably low<br><br>Common conditional Poisson model was used and the robustness was tested by a series of sensitivity analyses. No study protocol                                                                                                                                |
| Weinberger et al. (2021) <sup>14</sup> | Probably low<br><br>The exposed period for the study area was defined as 7 days after the Hurricane Sandy hit date and unexposed period was defined as the other days of the study period, while did account for time-varying cyclone exposures.                                                                                                                                     | Low<br><br>ED visit data was obtained official authorities and the study outcome was defined by standard ICD codes      | Probably low<br><br>The model controlled long-term time trend and seasonality (year, week of year) and day of week                                                                                        | Low<br><br>All ED visits occurring in the state of New York during the study period were obtained                                                                                                                                                           | Probably low<br><br>No sufficient information to evaluate the completeness of the outcome data, but the large sample size suggested a potential low risk | Probably low<br><br>Six outcomes were defined based on ED visits for six major diseases and all relevant findings were reported                     | Probably high<br><br>Declared potential conflict of interests for some authors | Low<br><br>Utilized well-established and standard time-series analysis with quasi-Poisson generalized linear model combined with a distributed lag non-linear model, complemented with a series of secondary analyses to test the robustness. No study protocol                   |
| Cowan et al.                           | Probably low                                                                                                                                                                                                                                                                                                                                                                         | Low                                                                                                                     | Probably low                                                                                                                                                                                              | Low                                                                                                                                                                                                                                                         | Probably low                                                                                                                                             | Low                                                                                                                                                 | Probably                                                                       | Probably low                                                                                                                                                                                                                                                                      |

|                                          |                                                                                                                                                                                                                                                                                                                                                               |                                                                                                                                                                               |                                                                                                                                                                                                                            |                                                                                                                                                                                                                                           |                                                                                                                                                      |                                                                                                                      |                                                                |                                                                                                                                                                                                                     |
|------------------------------------------|---------------------------------------------------------------------------------------------------------------------------------------------------------------------------------------------------------------------------------------------------------------------------------------------------------------------------------------------------------------|-------------------------------------------------------------------------------------------------------------------------------------------------------------------------------|----------------------------------------------------------------------------------------------------------------------------------------------------------------------------------------------------------------------------|-------------------------------------------------------------------------------------------------------------------------------------------------------------------------------------------------------------------------------------------|------------------------------------------------------------------------------------------------------------------------------------------------------|----------------------------------------------------------------------------------------------------------------------|----------------------------------------------------------------|---------------------------------------------------------------------------------------------------------------------------------------------------------------------------------------------------------------------|
| (2021) <sup>15</sup>                     | The exposed period for the study area was defined as 30 days after the Hurricane Irene hit date and unexposed period was defined as the same period in the previous year, while did account for time-varying cyclone exposures                                                                                                                                | ED visit data was obtained official authorities and the study outcome was defined by standard ICD codes                                                                       | The model controlled for county, long-term trend (month, year) and accounted for correlation between monthly county rates within the same year using an autoregressive-1 correlation structure                             | More than 97% of all ED visits in the state of North Carolina were obtained                                                                                                                                                               | No sufficient information to evaluate the completeness of the outcome data, but the large sample size suggested a potential low risk                 | Focused on ED visits for asthma and report all relevant findings                                                     | high<br>No declaration of potential conflict of interest found | Difference in differences with Poisson regression was used and the robustness was tested by a series of sensitivity analyses. No study protocol                                                                     |
| McCann-Pineo et al. (2021) <sup>16</sup> | Probably low<br>Exposure assessment was based on questionnaire collected from each individual                                                                                                                                                                                                                                                                 | Probably low<br>The outcome was assessed using adaptations from a widely implemented tool, but this tool had not been currently validated for being used in community samples | Probably high<br>The model in this cross-sectional study only adjusted for insurance status, location of recruitment, and smoking status                                                                                   | Probably high<br>Participants were conveniently sampled from the community                                                                                                                                                                | Low<br>No outcome data was excluded inappropriately                                                                                                  | Low<br>Focused on risk of opioid abuse and report all relevant findings                                              | Low<br>Declared no competing financial interests               | Probably high<br>Multinomial logistic regression was used. Sensitivity analysis like linearity check was not conducted                                                                                              |
| Zacher et al. (2021) <sup>17</sup>       | Probably high<br>The cyclone exposure for each individual was assessed based on a static point-in-time estimate of cyclone hit date, which did not account for the different exposure level and length across individuals                                                                                                                                     | Probably low<br>Self-reported current symptom for each individual                                                                                                             | Low<br>The model in this cohort study adjusted a wide range of confounders including age, race, number of children, married or cohabiting status, food stamp receipt, perceived social support, and psychological distress | High<br>Participants were originally recruited for another randomized controlled trial of an intervention to increase retention, but for the aim in current study, and the participants were composed largely of African American mothers | Low<br>No outcome data was excluded inappropriately                                                                                                  | Probably low<br>Three physical symptoms were collected and included as outcomes. All relevant findings were reported | Low<br>Declared no competing financial interests               | Probably low<br>Logistic regression was used, along with a series of secondary analyses to justify the results                                                                                                      |
| Li et al. (2021) <sup>18</sup>           | Probably low<br>Continuous cyclone exposure was assessed based on the path disappearance date, and wind speed of the cyclones. The persistent and time-varying cyclone exposures were considered. However, the exposure level was at the centroid of the cyclone and no wind field model was applied to quantify the exposure level at participants' location | Low<br>Dengue fever infections were obtained from the official surveillance system and were diagnosed by professional medical institutions                                    | Probably low<br>A time-stratified case-crossover design was utilized with control of the long-term trend, seasonality and day of week                                                                                      | Low<br>All officially recorded cases in the study area were obtained for the study period                                                                                                                                                 | Probably low<br>No sufficient information to evaluate the completeness of the outcome data, but the large sample size suggested a potential low risk | Low<br>Focused on dengue fever incidence and reported all relevant findings                                          | Low<br>Declared no competing financial interests               | Probably low<br>Utilized well-established and standard time-series analysis with conditional Poisson regression model, complemented with a series of sensitivity analyses to test the robustness. No study protocol |
| Bozick                                   | Probably low                                                                                                                                                                                                                                                                                                                                                  | Probably high                                                                                                                                                                 | Probably low                                                                                                                                                                                                               | Probably high                                                                                                                                                                                                                             | Low                                                                                                                                                  | Probably low                                                                                                         | Low                                                            | Probably low                                                                                                                                                                                                        |

|                                   |                                                                                                                                                                                                                                                                                                       |                                                                                                                                                                                                                      |                                                                                                                                                                                           |                                                                                                                                                           |                                                                                                                                                          |                                                                                                                                                                                          |                                                      |                                                                                                                                                                                                                                       |
|-----------------------------------|-------------------------------------------------------------------------------------------------------------------------------------------------------------------------------------------------------------------------------------------------------------------------------------------------------|----------------------------------------------------------------------------------------------------------------------------------------------------------------------------------------------------------------------|-------------------------------------------------------------------------------------------------------------------------------------------------------------------------------------------|-----------------------------------------------------------------------------------------------------------------------------------------------------------|----------------------------------------------------------------------------------------------------------------------------------------------------------|------------------------------------------------------------------------------------------------------------------------------------------------------------------------------------------|------------------------------------------------------|---------------------------------------------------------------------------------------------------------------------------------------------------------------------------------------------------------------------------------------|
| (2021) <sup>19</sup>              | A separate survey was conducted before the cyclone and after the cyclone was completely over, with those surveyed after the cyclone was completely over serving as the exposed group and those surveyed before the cyclone serving as the control, but did not account for the varying exposure level | Self-developed questions were used for each participant to collect self-reported health conditions, less of quality control procedure                                                                                | The model adjusted for age, sex, race, education, nativity, income, employment and marital status                                                                                         | Include a randomly selected population sample in Harris County, but the response rates were relatively low (about 33%)                                    | No outcome data was excluded inappropriately                                                                                                             | A wide array of questions about health were asked for each individual and were included in the study as outcomes                                                                         | Declared no competing financial interests            | A negative binomial regression model, supplemented by a series of secondary analyses, was used to justify this association. No study protocol                                                                                         |
| Meir et al. (2021) <sup>20</sup>  | Probably high<br><br>Utilized a hurricane period designated by the FEMA to define cyclone exposure for each individual, which did not account for the different exposure level and length across participants, nor did account for the time-varying exposures                                         | Probably low<br><br>Despite the outcomes were obtained from an official national database and had been validated, there is still a potential recall bias as they were mainly self-reported by patients to the clinic | Probably high<br><br>The model adjusted for age, maximum follicle stimulating hormone levels, gravidity, and infertility diagnosis, while did not consider the education and income level | Probably low<br><br>The database includes the outcome data from 85% of the centres within the US and is prospectively collected by each individual centre | Probably low<br><br>No sufficient information to evaluate the completeness of the outcome data, but the large sample size suggested a potential low risk | Low<br><br>Main adverse birth outcomes including Preterm birth, birth weight, miscarriage rate and infant sex ratio were included and reported with statistically insignificant findings | Low<br><br>Declared no competing financial interests | Probably low<br><br>This study used generalized estimating equations to account for the within-patient correlations and used a series of secondary analyses to examine the association. No study protocol                             |
| Parks et al. (2021) <sup>21</sup> | Low<br><br>Cyclone exposure was assessed based on high-resolution wind field model that accounted for the spatially and temporally varying cyclone exposure.                                                                                                                                          | Low<br><br>Inpatient data was obtained national official authorities and the study outcomes were defined by standard ICD codes                                                                                       | Probably low<br><br>The model adjusted for day of week, long-term trend and temperature, but not public holiday                                                                           | Low<br><br>Hospitalization data from 70 million Medicare hospitalizations across US over a 16-year period was obtained                                    | Probably low<br><br>No sufficient information to evaluate the completeness of the outcome data, but the large sample size suggested a potential low risk | Low<br><br>Included a wide range of 13 CCS level 1 causes that covering almost all death causes                                                                                          | Low<br><br>Declared no competing financial interests | Low<br><br>Utilized well-established and standard time-series analysis with conditional quasi-Poisson regression model combined with a distributed lag non-linear model to account for the cumulative and delayed effects of cyclones |
| Yan et al. (2021) <sup>22</sup>   | Low<br><br>Cyclone exposure was assessed based on high-resolution wind field model that accounted for the spatially and temporally varying cyclone exposure.                                                                                                                                          | Low<br><br>Emergency Medicare hospital admissions data was obtained national official authorities and the study outcomes were defined by standard ICD codes                                                          | Probably low<br><br>The model adjusted for year, day of week, random intercept of county, but not public holiday                                                                          | Low<br><br>All emergency Medicare hospital admissions data was obtained from the eastern half of the US that experienced cyclones                         | Probably low<br><br>No sufficient information to evaluate the completeness of the outcome data, but the large sample size suggested a potential          | Low<br><br>Two major diseases (respiratory and cardiovascular diseases) and their subtypes were included in the                                                                          | Low<br><br>Declared no competing financial interests | Low<br><br>Utilized well-established and standard time-series analysis with Poisson regression model combined with a distributed lag non-                                                                                             |

|                                         |                                                                                                                                                                                                                                                                                                     |                                                                                                                                        |                                                                                                                                                                                                                                                |                                                                                                                                             |                                                                                                                                                          |                                                                                                                                                                                                                           |                                                                                |                                                                                                                                                                                                                                              |
|-----------------------------------------|-----------------------------------------------------------------------------------------------------------------------------------------------------------------------------------------------------------------------------------------------------------------------------------------------------|----------------------------------------------------------------------------------------------------------------------------------------|------------------------------------------------------------------------------------------------------------------------------------------------------------------------------------------------------------------------------------------------|---------------------------------------------------------------------------------------------------------------------------------------------|----------------------------------------------------------------------------------------------------------------------------------------------------------|---------------------------------------------------------------------------------------------------------------------------------------------------------------------------------------------------------------------------|--------------------------------------------------------------------------------|----------------------------------------------------------------------------------------------------------------------------------------------------------------------------------------------------------------------------------------------|
|                                         |                                                                                                                                                                                                                                                                                                     |                                                                                                                                        |                                                                                                                                                                                                                                                |                                                                                                                                             | low risk                                                                                                                                                 | study.                                                                                                                                                                                                                    |                                                                                | linear model to account for the cumulative and delayed effects of cyclones                                                                                                                                                                   |
| Nethery et al. (2021) <sup>23</sup>     | Probably low<br><br>Cyclone exposure was assessed based on high-resolution wind field model to account for cyclone strength, but only used the cyclone start date and did not account for the cyclone varying length                                                                                | Low<br><br>Mortality data was obtained national official authorities and the study outcomes were defined by standard ICD codes         | Probably low<br><br>The model adjusted for the space-time trends (including trends induced by time-varying confounders)                                                                                                                        | Low<br><br>All mortality data was obtained across US during the study period                                                                | Low<br><br>No outcome data was excluded inappropriately                                                                                                  | Probably low<br><br>Three major outcomes (all-cause mortality, respiratory and cardiovascular diseases mortality), as well as COPD hospitalizations were selected and included                                            | Low<br><br>Declared no competing financial interests                           | Probably low<br><br>This study developed a new model based on machine learning approach to account for the cyclone-specific effects. A series of sensitivity and secondary analyses were conducted to justify the results. No study protocol |
| de Oliveira et al. (2021) <sup>24</sup> | Probably high<br><br>The cyclone exposure for each individual was assessed based on a static point-in-time estimate of cyclone hit date, which may not consider the varying cyclone exposure level and length across individuals accurately, nor did account for the time-varying cyclone exposures | Low<br><br>Outcome data was obtained national official authorities and the study outcomes were defined using well-established standard | Probably low<br><br>The model adjusted for a wide range of confounders including year, regional effects, year-specific region effects, season of birth effects, year-specific season of birth effects, region-specific season of birth effects | Low<br><br>All outcome data were obtained from the study area during the study period                                                       | Probably low<br><br>No sufficient information to evaluate the completeness of the outcome data, but the large sample size suggested a potential low risk | Probably low<br><br>A wide range of adverse birth outcomes including birth weight, low birth weight, high birth weight, short gestational length, long gestational length, Apgar score, and fetal mortality were reported | Probably high<br><br>No declaration of potential conflict of interest found    | Probably low<br><br>Standard difference-in-difference approach was used to assess the cyclone effects. A series of sensitivity and secondary analyses were conducted to justify the results. No study protocol                               |
| Dosa et al. (2020) <sup>25</sup>        | Probably high<br><br>The cyclone exposure for each individual was assessed based on a static point-in-time estimate of cyclone hit date, which may not consider the cyclone exposure strength and length across individuals accurately, nor did account for the time-varying cyclone exposures      | Low<br><br>Outcome data was obtained local official authorities and the outcomes only included all-cause mortality and hospitalization | Probably low<br><br>The study clustered the model by person ID and facility ID to account for within-person and within-facility ID variance. A directed acyclic graph was supplemented to support the analysis assumptions                     | Low<br><br>Outcome data were collected quarterly on all participants and are also collected after significant changes in health care status | Low<br><br>No outcome data was excluded inappropriately                                                                                                  | Probably low<br><br>To major health outcome of all-cause mortality and first Hospitalization were included and all relevant findings were reported                                                                        | Probably high<br><br>Declared potential conflict of interests for some authors | Probably low<br><br>General estimation equations was used to assess the cyclone effects. A series of sensitivity and secondary analyses were conducted to justify the results. No study protocol                                             |
| Kanaoka et al. (2020) <sup>26</sup>     | Probably low                                                                                                                                                                                                                                                                                        | Low                                                                                                                                    | Probably low                                                                                                                                                                                                                                   | Low                                                                                                                                         | Probably high                                                                                                                                            | Low                                                                                                                                                                                                                       | Low                                                                            | Probably low                                                                                                                                                                                                                                 |

|                                      |                                                                                                                                                                                                                          |                                                                                                                                        |                                                                                                                                                                                                                  |                                                                                                                                                                                       |                                                                                                                                                                                                                |                                                                                        |                                                                                |                                                                                                                                                                                                                                                                                     |
|--------------------------------------|--------------------------------------------------------------------------------------------------------------------------------------------------------------------------------------------------------------------------|----------------------------------------------------------------------------------------------------------------------------------------|------------------------------------------------------------------------------------------------------------------------------------------------------------------------------------------------------------------|---------------------------------------------------------------------------------------------------------------------------------------------------------------------------------------|----------------------------------------------------------------------------------------------------------------------------------------------------------------------------------------------------------------|----------------------------------------------------------------------------------------|--------------------------------------------------------------------------------|-------------------------------------------------------------------------------------------------------------------------------------------------------------------------------------------------------------------------------------------------------------------------------------|
|                                      | Continuous cyclone exposure for the study area was defined based on the windspeed data from Meteorological Agency, but did not account for cyclone strength                                                              | Outcome data was diagnosed by physicians based on standard ICD code                                                                    | The study adjusted individual-level temporally invariant confounders such as overall sociodemographic status, gender, healthcare access by a self-matched design                                                 | Outcome data were collected nationwide and showed a good representativeness                                                                                                           | A total of 10 782 patients with Takotsubo syndrome were identified at 834 hospitals, but only 6959 of them who were $\geq 20$ years old and underwent coronary angiography were included in the final analysis | Focused on Takotsubo syndrome and reported all relevant findings                       | Declared no competing financial interests                                      | In the framework of a self-controlled case series design, standard conditional Poisson regression model was applied to assess the cyclone-related risks. A series of secondary analyses were conducted. Inadequate information provided to judge the compliance with study protocol |
| Sun et al. (2020) <sup>27</sup>      | Low<br><br>Cyclone exposure was assessed based on high-resolution wind field model that accounted for the spatially and temporally varying cyclone exposure.                                                             | Low<br><br>Outcome data was obtained national official authorities and the study outcomes were defined using well-established standard | Probably low<br><br>The study adjusted year, day of week, daily expected number of preterm births, country random intercept, but not public holiday                                                              | Low<br><br>Outcome data were collected nationwide and showed a good representativeness                                                                                                | Probably low<br><br>Though outcome data was collected across the US, but was only available for counties with a population of $\geq 100,000$                                                                   | Low<br><br>Focused on preterm birth and reported all relevant findings                 | Probably high<br><br>Declared potential conflict of interests for some authors | Low<br><br>Utilized well-established and standard time-series analysis of distributed lag log-linear mixed-effects models to account for the cumulative and delayed effects of cyclones. No study protocol                                                                          |
| Schwartz et al. (2019) <sup>28</sup> | Probably low<br><br>Exposure assessment was based on cyclone experience collected by self-reported questionnaire collected from each individual                                                                          | Low<br><br>Outcome was assessed based on standard and well-established criteria                                                        | Low<br><br>The study adjusted a wide range of confounders including age, gender, race, education, mental health treatment, history of mental health issues, time elapsed between Hurricane Sandy and survey time | Probably high<br><br>Part of the participants were conveniently sampled from the community                                                                                            | Probably low<br><br>More than 90% of the participants had complete outcome data                                                                                                                                | Low<br><br>Focused on PTSD and reported all relevant findings                          | Probably high<br><br>Declared potential conflict of interests for some authors | Probably low<br><br>Used traditional logistic regression to assess the cyclone-related risks. A series of secondary analyses were conducted. Inadequate information provided to judge the compliance with study protocol                                                            |
| An et al. (2019) <sup>29</sup>       | Probably high<br><br>The cyclone exposure for each individual was assessed based on a static point-in-time estimate of cyclone hit date, which may not consider the varying exposure level and length across individuals | Low<br><br>Outcome was assessed based on standard and well-established criteria                                                        | Low<br><br>The study adjusted a wide range of confounders including sex, age, race, education, employment status, marital status,                                                                                | Probably low<br><br>The participants were from a US state-based system of annually repeated cross-sectional telephone surveys that collect information on health information among US | Probably high<br><br>More than 20% of the participants were excluded due to incomplete data                                                                                                                    | Probably low<br><br>A wide range of mental health indicators were included as outcomes | Low<br><br>Declared no competing financial interests                           | Probably low<br><br>The cyclone-related risks were assessed using standard difference-in-differences analysis with linear regression. A series of secondary                                                                                                                         |



|                                          |                                                                                                                                                                                                                                                                                             |                                                                                                                                                 |                                                                                                                                                                                    |                                                                                                                                                           |                                                                                                                                                                 |                                                                                                                                                                       |                                                                                |                                                                                                                                                                          |
|------------------------------------------|---------------------------------------------------------------------------------------------------------------------------------------------------------------------------------------------------------------------------------------------------------------------------------------------|-------------------------------------------------------------------------------------------------------------------------------------------------|------------------------------------------------------------------------------------------------------------------------------------------------------------------------------------|-----------------------------------------------------------------------------------------------------------------------------------------------------------|-----------------------------------------------------------------------------------------------------------------------------------------------------------------|-----------------------------------------------------------------------------------------------------------------------------------------------------------------------|--------------------------------------------------------------------------------|--------------------------------------------------------------------------------------------------------------------------------------------------------------------------|
|                                          | accurately, nor did account for the time-varying cyclone exposures                                                                                                                                                                                                                          |                                                                                                                                                 | pregnancy, annual household income levels, physical activity, BMI, smoking, self-rated physical health, interview month                                                            | adults                                                                                                                                                    |                                                                                                                                                                 |                                                                                                                                                                       |                                                                                | analyses were conducted. No study protocol                                                                                                                               |
| Quast et al. (2019) <sup>30</sup>        | Probably high<br><br>The cyclone exposure for each individual was assessed based on a static point-in-time estimate of cyclone hit date, which may not consider the varying exposure level and length across individuals accurately, nor did account for the time-varying cyclone exposures | Low<br><br>Mortality data was obtained from official and reliable authorities, and the outcomes were defined based on standard ICD code         | Probably low<br><br>The study adjusted age, gender, race, Medicaid premiums, end-stage renal disease coverage, chronic condition                                                   | Probably low<br><br>Focused on seniors with diabetes, and included a large and representative sample, while these seniors were all Medicare beneficiaries | Probably high<br><br>Only about half of the study participants were finally included in the analysis after a series of exclusion criteria (e.g., data validity) | Probably high<br><br>All mortality causes were obtained, while only included and analysed mortality from diabetes, major cardiovascular disease, and nephritis        | Low<br><br>Declared no competing financial interests                           | Probably low<br><br>The cyclone-related risks were assessed using conditional logit regressions. A series of secondary analyses were conducted. No study protocol        |
| Cruz-Cano and Mead (2019) <sup>31</sup>  | Probably low<br><br>The exposed period for the study area was defined as about 40 days after the Hurricane Maria hit date and unexposed period was defined as the 9-year period before the Hurricane Maria hit date, while did account for time-varying cyclone exposures                   | Low<br><br>Mortality data was obtained from official and reliable authorities, and the outcomes were defined based on standard ICD code         | Probably low<br><br>The study adjusted seasonality, long-term trend and natural variation using a standard time-series analysis of auto-regressive integrated moving-average model | Low<br><br>All outcome data in the study area during the study period was collected                                                                       | Probably low<br><br>No sufficient information to evaluate the completeness of the outcome data, but the large sample size suggested a potential low risk        | Probably high<br><br>All mortality causes were obtained, while only included and analysed mortality from diabetes, heart disease, Alzheimer's disease and Septicaemia | Low<br><br>Declared no competing financial interests                           | Probably low<br><br>Standard time-series analysis of auto-regressive integrated moving-average model was used. No study protocol                                         |
| Kontoyiannis et al. (2019) <sup>32</sup> | Probably low<br><br>The exposed period for the study area was defined as about 12 months after the Hurricane Harvey hit date and unexposed period was defined as the 1-year period before the Hurricane Harvey hit date, while did account for time-varying cyclone exposures               | Low<br><br>Outcome data was obtained from official and reliable surveillance database and the outcomes were defined based on validated criteria | Probably high<br><br>Seasonality, long-term trend and natural variation were all not accounted for                                                                                 | Low<br><br>All records to define the outcomes in the study area during the study period was collected                                                     | Probably low<br><br>No sufficient information to evaluate the completeness of the outcome data, but the large sample size suggested a potential low risk        | Low<br><br>Focused on mold infections and reported all relevant findings                                                                                              | Probably high<br><br>Declared potential conflict of interests for some authors | Probably high<br><br>Ordinary least squares regression was used before and after the cyclone period, without any variable adjustment, sensitivity or secondary analysis. |
| Lawrence et al. (2019) <sup>33</sup>     | Probably low<br><br>Pre-hurricane (unexposed) and post-hurricane (exposed) period for the study area was defined on the basis of the                                                                                                                                                        | Low<br><br>Outcome data was obtained from official and reliable authorities, and the outcomes were defined                                      | Probably low<br><br>The study adjusted race and gender, and the temporal factors and                                                                                               | Low<br><br>All records to define the outcomes in the study area during the study period was collected                                                     | Probably low<br><br>No sufficient information to evaluate the completeness of the                                                                               | Probably low<br><br>Focused on cardiovascular, respiratory, and injury, and                                                                                           | Low<br><br>Declared no competing financial                                     | Probably low<br><br>Poisson regression was performed to test whether there was an association of                                                                         |

|                                          |                                                                                                                                                                                                                                                                                                  |                                                                                                                                                   |                                                                                              |                                                                                                                                                                                |                                                                                                                                                          |                                                                                                                                                                                                                |                                                                             |                                                                                                                                                                                     |
|------------------------------------------|--------------------------------------------------------------------------------------------------------------------------------------------------------------------------------------------------------------------------------------------------------------------------------------------------|---------------------------------------------------------------------------------------------------------------------------------------------------|----------------------------------------------------------------------------------------------|--------------------------------------------------------------------------------------------------------------------------------------------------------------------------------|----------------------------------------------------------------------------------------------------------------------------------------------------------|----------------------------------------------------------------------------------------------------------------------------------------------------------------------------------------------------------------|-----------------------------------------------------------------------------|-------------------------------------------------------------------------------------------------------------------------------------------------------------------------------------|
|                                          | Hurricane Sandy starting and ending months, while did not account for the time-varying cyclone exposures                                                                                                                                                                                         | based on standard ICD code                                                                                                                        | sociodemographic differences by counties were addressed by utilization of two control groups |                                                                                                                                                                                | outcome data, but the large sample size suggested a potential low risk                                                                                   | emergency department visits, outpatient visits, and hospital admissions were all reported                                                                                                                      | interests                                                                   | increased visits/admissions for periods following Superstorm Sandy while controlling for covariates. No study protocol                                                              |
| Ekperi et al. (2018) <sup>34</sup>       | Probably low<br><br>Pre-hurricane (unexposed) and post-hurricane (exposed) period for the study area was defined on the basis of the Hurricane Sandy hit date, while did not account for the time-varying cyclone exposures                                                                      | Probably Low<br><br>HIV data was obtained from a reliable health insurance claim database                                                         | Probably low<br><br>Seasonality and autocorrelation were account for                         | Probably high<br><br>Only Medicare-eligible retirees are included, which means only privately insured population was represented. The analyses were limited to non-rural areas | Probably low<br><br>No sufficient information to evaluate the completeness of the outcome data, but the large sample size suggested a potential low risk | Low<br><br>Focused on HIV testing rates and reported all relevant findings                                                                                                                                     | Low<br><br>Declared no competing financial interests                        | Low<br><br>Utilized well-established interrupted time-series analysis. No study protocol                                                                                            |
| Van Loenhout et al. (2018) <sup>35</sup> | Probably high<br><br>The cyclone exposure for each individual was assessed based on a static point-in-time estimate of cyclone landfall date, which may not consider the varying exposure level and length across individuals accurately, nor did account for the time-varying cyclone exposures | Low<br><br>Outcome data was obtained from the reliable central hospital registries, and the outcomes were reclassified based on standard ICD code | Probably high<br><br>No confounders were account for                                         | Low<br><br>All the people from the two study hospitals were included                                                                                                           | Probably low<br><br>No sufficient information to evaluate the completeness of the outcome data, but the large sample size suggested a potential low risk | Low<br><br>Focused on pregnancy, infections, respiratory, genitourinary, digestive, circulatory, and injury and reported all relevant findings                                                                 | Low<br><br>Declared no competing financial interests                        | Probably low<br><br>Logistic regression was used without covariates but sensitivity analyses were used to prove the robustness of the results. No study protocol                    |
| Kim et al. (2017) <sup>36</sup>          | Probably low<br><br>The exposed period for the study area was defined as about 3 months after the Hurricane Sandy hit date and unexposed period was defined as the 2-year period before the Hurricane Sandy hit date, while did account for time-varying cyclone exposures                       | Low<br><br>Mortality data was obtained from the reliable authorities, and the outcomes were defined based on standard ICD code                    | Probably low<br><br>Seasonality and time trend were account for                              | Low<br><br>All the persons whose primary residence was New Jersey and elderly residents aged 76 years or older from 2008 to 2013 were included                                 | Probably low<br><br>No sufficient information to evaluate the completeness of the outcome data, but the large sample size suggested a potential low risk | Low<br><br>Focused on mortality and reported all relevant findings on all-cause and non-infectious respiratory, infectious, cardiovascular disease, unintentional injury, and carbon monoxide poisoning deaths | Probably high<br><br>No declaration of potential conflict of interest found | Probably low<br><br>Negative binomial regression models were used to estimate death rates contrasted Hurricane Sandy month or quarter with the comparison period. No study protocol |

|                                      |                                                                                                                                                                                                                                                                                                                                                                                                 |                                                                                                                                                                                                       |                                                                                                                                                                                                                                   |                                                                                                                          |                                                                                                                                                          |                                                                                                                                                                                                                                                                 |                                                                             |                                                                                                                                                                                |
|--------------------------------------|-------------------------------------------------------------------------------------------------------------------------------------------------------------------------------------------------------------------------------------------------------------------------------------------------------------------------------------------------------------------------------------------------|-------------------------------------------------------------------------------------------------------------------------------------------------------------------------------------------------------|-----------------------------------------------------------------------------------------------------------------------------------------------------------------------------------------------------------------------------------|--------------------------------------------------------------------------------------------------------------------------|----------------------------------------------------------------------------------------------------------------------------------------------------------|-----------------------------------------------------------------------------------------------------------------------------------------------------------------------------------------------------------------------------------------------------------------|-----------------------------------------------------------------------------|--------------------------------------------------------------------------------------------------------------------------------------------------------------------------------|
| Bromet et al. (2017) <sup>37</sup>   | Probably low<br><br>Exposure assessment was based on cyclone experience collected by self-reported questionnaire collected from each individual                                                                                                                                                                                                                                                 | Low<br><br>The outcome data was obtained from the reliable authorities, and the possible major depressive disorder was determined based on standard Patient Health Questionnaire                      | Low<br><br>Adjusted a series of confounders including age, sex, educational attainment, marital status, responder type, time from pre-Hurricane assessment to the post-Hurricane visit, prior exposure, and prior psychopathology | Low<br><br>All the persons under the treatment of responders with documented World Trade Centre experience were included | Probably low<br><br>Only 17 out of 887 participants who did not complete a brief Hurricane Sandy Questionnaire were excluded (1.9%)                      | Low<br><br>Focused on posttraumatic stress disorder and overall depression and all the relevant findings were reported                                                                                                                                          | Probably high<br><br>No declaration of potential conflict of interest found | Probably low<br><br>Logistic regression was used accounting for a series of confounders. No study protocol                                                                     |
| Grabich et al. (2017) <sup>38</sup>  | Probably high<br><br>The exposure of multiple cyclones for the study area was defined a static point-in-time estimate of cyclone hit date, while may not account for the varying strength and length across cyclones accurately, not did account for time-varying cyclone exposures                                                                                                             | Low<br><br>The reproductive health data was obtained from the official reliable authorities, and the possible major depressive disorder was determined based on standard Patient Health Questionnaire | Probably low<br><br>Seasonality and time trend were account for                                                                                                                                                                   | Low<br><br>All Florida pregnancies conceived before or during the 2003 and 2004 hurricane season were included           | Low<br><br>No outcome data was excluded inappropriately                                                                                                  | Probably high<br><br>Focused on reproductive health while only low birth weight, fetal death, and birth rate were studied                                                                                                                                       | Probably high<br><br>No declaration of potential conflict of interest found | Probably low<br><br>Difference-in-differences analysis with linear regression was used to assess the risk of adverse reproductive outcomes due to hurricane. No study protocol |
| Zheng et al. (2017) <sup>39</sup>    | Probably low<br><br>Continuous cyclone exposure was assessed by including the information on the generation and disappearance date, path, landing location, rainfall and wind speed of the cyclones to account for the persistent exposures. However, the exposure level was at the centroid of the cyclone and no wind field model was applied to quantify the exposure level at each location | Low<br><br>The outcome data was obtained from the official reliable authorities, and all eligible cases were reported by local hospitals that received patients                                       | High<br><br>No confounders were account for                                                                                                                                                                                       | Low<br><br>All the eligible records in 42 cities of southeast China were included                                        | Probably low<br><br>No sufficient information to evaluate the completeness of the outcome data, but the large sample size suggested a potential low risk | Low<br><br>After excluding disease unlikely to be affected by TCs and whose numbers of reported cases during both disaster and reference periods were less than 10, this study focused on 14 non-infectious disease and all the relevant findings were reported | Low<br><br>Declared no competing financial interests                        | Probably high<br><br>Crude elevated risks associated with cyclones were derived based on a formula without any adjustment on potential confounders                             |
| Schwartz et al. (2017) <sup>40</sup> | Probably low<br><br>Exposure assessment was based on cyclone experience collected by self-reported questionnaire collected from                                                                                                                                                                                                                                                                 | Low<br><br>The outcome data was obtained through surveys from multiple reliable sources and determined via                                                                                            | Low<br><br>Adjusted a series of confounders including age, gender, race, education, medical                                                                                                                                       | Probably high<br><br>Convenience-sampling techniques was used while only 19.3% out of the participants at baseline       | Probably low<br><br>The majority of the variables were without missing data, with five variables                                                         | Low<br><br>Focused on mental health symptoms and depression, anxiety, and PTSD                                                                                                                                                                                  | Low<br><br>Declared no competing financial                                  | Probably low<br><br>Logistic regression were used to analyse the elevated prevalence risks of                                                                                  |

|                                      |                                                                                                                                                                                                                                                                          |                                                                                                                                                                                                                                            |                                                                                                                                                                                  |                                                                                                                                                                                                                                                                               |                                                                                                                                                          |                                                                                                                                                                                                                    |                                                                             |                                                                                                                                                                                                                          |
|--------------------------------------|--------------------------------------------------------------------------------------------------------------------------------------------------------------------------------------------------------------------------------------------------------------------------|--------------------------------------------------------------------------------------------------------------------------------------------------------------------------------------------------------------------------------------------|----------------------------------------------------------------------------------------------------------------------------------------------------------------------------------|-------------------------------------------------------------------------------------------------------------------------------------------------------------------------------------------------------------------------------------------------------------------------------|----------------------------------------------------------------------------------------------------------------------------------------------------------|--------------------------------------------------------------------------------------------------------------------------------------------------------------------------------------------------------------------|-----------------------------------------------------------------------------|--------------------------------------------------------------------------------------------------------------------------------------------------------------------------------------------------------------------------|
|                                      | each individual                                                                                                                                                                                                                                                          | previously validated Patient Health Questionnaire-4 (PHQ-4) for depression and anxiety; Civilian PTSD Questionnaire–Hurricane Sandy Specific (PTSD/PCL-S) for PTSD symptoms                                                                | insurance, existing mental health conditions, elapsed time between Hurricane and baseline, and mental health condition at baseline                                               | participated in the follow-up study                                                                                                                                                                                                                                           | having one to two missing data, which were treated as missing at random                                                                                  | with all the relevant findings were reported                                                                                                                                                                       | interests                                                                   | mental health symptoms associated with cyclone exposure, with a series of secondary analyses being conducted to justify the association. No study protocol                                                               |
| Sharp et al. (2016) <sup>41</sup>    | Probably low<br><br>The exposed period for the study area was defined as about 1 year after the Hurricane Sandy hit date and unexposed period was defined as the 2-year period before the Hurricane Sandy hit date, while did account for time-varying cyclone exposures | Low<br><br>Medicaid claims data was obtained from official and reliable authorities and were identified by well-established standard coding system (e.g., UB-04 code and ICD code)                                                         | Probably low<br><br>Day of the week and time trend were account for                                                                                                              | Low<br><br>All Medicaid enrollees in the study area were included                                                                                                                                                                                                             | Low<br><br>All Medicaid enrollees, excluding those dually eligible for Medicare, in the study locations during the study period were included            | Probably low<br><br>Focused on health services utilization and all services, diabetes, substance abuse, and mental health related inpatient, outpatient, emergency department, and pharmacy services were reported | Probably high<br><br>No declaration of potential conflict of interest found | Probably low<br><br>Negative binomial regression models with generalized estimating equations (GEEs) and Poisson regression were used for each effect period. No study protocol                                          |
| Dresser et al. (2016) <sup>42</sup>  | Probably high<br><br>Exposure assessment was at country level                                                                                                                                                                                                            | Probably low<br><br>The fatality data was obtained from official reliable authorities while information on specific mechanism of death was not uniformly available                                                                         | Probably low<br><br>Adjusted a series of confounders including category of GDP, category storm amplitude, the interaction of GDP category and storm amplitude, and year of storm | Low<br><br>All data on fatalities in 16 nations between 1958 and 2011 were analysed                                                                                                                                                                                           | Probably low<br><br>No sufficient information to evaluate the completeness of the outcome data, but the large sample size suggested a potential low risk | Low<br><br>Focused on death rate without specifying causes and all the relevant findings were reported                                                                                                             | Probably high<br><br>No declaration of potential conflict of interest found | Probably low<br><br>Generalized estimating equations with negative binomial regression was used and the selection of model covariates was guided by the quasi-likelihood under independence criterion. No study protocol |
| Schwartz et al. (2016) <sup>43</sup> | Probably low<br><br>Exposure assessment was based on cyclone experience collected by self-reported questionnaire collected from each individual                                                                                                                          | Probably low<br><br>The outcome data was obtained via self-reported but validated measures of depression, anxiety, and post-traumatic stress symptoms as well as indicators of substance use (alcohol, illicit substance, and tobacco use) | Low<br><br>Adjusted a series of confounders including age, sex, ethnicity, education, existing mental health status, time elapsed since Hurricane exposure                       | Probably high<br><br>Only 407 English-speaking participants living in the Rockaways were included and no clear information on how these participants were selected from the study community, which might be not sufficiently representative to all the residents in Rockaways | Low<br><br>No outcome data was excluded inappropriately                                                                                                  | Low<br><br>Focused on depression, anxiety, PTSD and substance usage and all the relevant findings were reported                                                                                                    | Probably high<br><br>No declaration of potential conflict of interest found | Probably low<br><br>Logistic regression was used, with additional analyses conducted to explore the effect of modifiers on the exposure-outcome association by adding an interaction term. No study protocol             |
| Marshall et                          | Probably low                                                                                                                                                                                                                                                             | Low                                                                                                                                                                                                                                        | Probably low                                                                                                                                                                     | Probably low                                                                                                                                                                                                                                                                  | Probably low                                                                                                                                             | Low                                                                                                                                                                                                                | Probably                                                                    | Probably low                                                                                                                                                                                                             |

|                                    |                                                                                                                                                                                                                                                                                                                                                                                             |                                                                                                                                                                   |                                                                                                                                       |                                                                                                                                       |                                                                                                                                                                                                                                                 |                                                                                                        |                                                                         |                                                                                                                                                                                                                      |
|------------------------------------|---------------------------------------------------------------------------------------------------------------------------------------------------------------------------------------------------------------------------------------------------------------------------------------------------------------------------------------------------------------------------------------------|-------------------------------------------------------------------------------------------------------------------------------------------------------------------|---------------------------------------------------------------------------------------------------------------------------------------|---------------------------------------------------------------------------------------------------------------------------------------|-------------------------------------------------------------------------------------------------------------------------------------------------------------------------------------------------------------------------------------------------|--------------------------------------------------------------------------------------------------------|-------------------------------------------------------------------------|----------------------------------------------------------------------------------------------------------------------------------------------------------------------------------------------------------------------|
| al. (2016) <sup>44</sup>           | Exposed areas were defined based on an impact score as reflected by the cyclone-related power loss; residential, commercial, and municipal damage; emergency shelters established; and gasoline shortages                                                                                                                                                                                   | The outcome data was obtained through official authorities and the study outcomes were diagnosed according to standard ICD code                                   | Seasonality and time trend were account for                                                                                           | All emergency department and hospital discharge data within the study area during the study period were collected                     | Records were excluded for the same patient where the site and type of injury was the same and the date of hospitalization was within 30 days of a prior hospitalization and the completeness of reporting of work-related injuries was assessed | Focused on work-related unintentional injuries and all the relevant findings were reported             | high<br>No declaration of potential conflict of interest found          | Descriptive and Poisson regression analyses were used to evaluate the short-term and long-term impact of Hurricane Sandy. No study protocol                                                                          |
| Deng et al. (2015) <sup>45</sup>   | Probably low<br>Continuous cyclone exposure was assessed by including the information on the generation and disappearance date, path, landing location, rainfall and wind speed of the cyclones to account for the persistent exposures. However, the exposure level was at the centroid of the cyclone and no wind field model was applied to quantify the exposure level at each location | Low<br>The outcome data was obtained through official reliable authorities and was determined by physicians via well-established criteria                         | Probably low<br>A series of time-invariant confounders such as age, sex, and geographic region were adjusted by a self-matched design | Low<br>All the eligible notified cases of infectious diarrhea in the study areas in Zhejiang Province from 2005 to 2011 were included | Probably low<br>No sufficient information to evaluate the completeness of the outcome data, but the large sample size suggested a potential low risk                                                                                            | Low<br>Focused on infectious diarrhea and all the relevant findings were reported                      | Low<br>Declared no competing financial interests                        | Probably low<br>A standard case-crossover design combined with conditional logistic regression models were used to analyse the exposure odds for the case period compared with the control period. No study protocol |
| Wang et al. (2015) <sup>46</sup>   | Probably low<br>Cyclone exposure was assessed based on the officially reported cyclone date and length, while did not account for the cyclone strength and time-varying cyclone exposures                                                                                                                                                                                                   | Low<br>Daily disease surveillance data on infectious diarrhea was obtained through official reliable authorities and was determined via well-established criteria | Probably high<br>Time trend and natural variation were all not accounted for                                                          | Low<br>Almost all the incidences in Guangdong, China, were recorded and included                                                      | Probably low<br>No sufficient information to evaluate the completeness of the outcome data, but the large sample size suggested a potential low risk                                                                                            | Low<br>Focused on infectious diarrhea and all the relevant findings were reported                      | Probably high<br>No declaration of potential conflict of interest found | Probably high<br>Crude elevated risks associated with cyclones were derived based on a formula without any adjustment on potential confounders                                                                       |
| Tian and Guan (2015) <sup>47</sup> | Probably high<br>Exposed period was defined as the cyclone year (2005) and unexposed period was defined as the year (2004) before cyclone year (2005), which may not consider the cyclone start date accurately                                                                                                                                                                             | Low<br>Outcome records were obtained from official reliable authorities                                                                                           | Probably low<br>Adjusted a series of confounders including Gender, race, economic status, grade and school sites                      | Low<br>All Louisiana K12 students in US during 2000–2008 were studied                                                                 | Probably low<br>A loss of 6.78% observations happened after 2005 when Katrina happened                                                                                                                                                          | Low<br>Focused on displaced students' behavioural disorder and all the relevant findings were reported | Low<br>Declared no competing financial interests                        | Probably low<br>Difference-in-differences analysis with linear probability mod was used to investigate the effect of Hurricane Katrina on students' in-school behaviour. No study                                    |

|                                          |                                                                                                                                                                                                                         |                                                                                                                                                             |                                                          |                                                                                                                |                                                                                                                                                          |                                                                                                                                                          |                                                                             |                                                                                                                                                                                                                                                                                           |
|------------------------------------------|-------------------------------------------------------------------------------------------------------------------------------------------------------------------------------------------------------------------------|-------------------------------------------------------------------------------------------------------------------------------------------------------------|----------------------------------------------------------|----------------------------------------------------------------------------------------------------------------|----------------------------------------------------------------------------------------------------------------------------------------------------------|----------------------------------------------------------------------------------------------------------------------------------------------------------|-----------------------------------------------------------------------------|-------------------------------------------------------------------------------------------------------------------------------------------------------------------------------------------------------------------------------------------------------------------------------------------|
|                                          |                                                                                                                                                                                                                         |                                                                                                                                                             |                                                          |                                                                                                                |                                                                                                                                                          |                                                                                                                                                          |                                                                             | protocol                                                                                                                                                                                                                                                                                  |
| Antipova and Curtis (2015) <sup>48</sup> | Probably low<br><br>Exposed area was defined as the areas within the 20-mile buffer of the officially recorded cyclone track, an area with sustain little or no damage was selected as the comparison (unexposed) area  | Low<br><br>Birth and death certificate records were obtained from official reliable authorities and the study outcomes were defined using standard criteria | High<br><br>No confounders were account for              | Low<br><br>All outcome data was obtained from the study area for the study period of 1991 to 1995 was obtained | Probably low<br><br>No sufficient information to evaluate the completeness of the outcome data, but the large sample size suggested a potential low risk | Low<br><br>Focused on birth outcomes. Two main pregnancy outcomes (i.e., preterm birth and low birth weight) and all the relevant findings were reported | Probably high<br><br>No declaration of potential conflict of interest found | Probably high<br><br>A Chi-squared test coupled with the Cochran-Mantel Haenszel statistic (CMH) was applied to see if the proportion of preterm and low-weight births were significantly different before and after the hurricane without considering any confounders. No study protocol |
| Swerdel et al. (2014) <sup>49</sup>      | Probably low<br><br>Exposed period was defined as the 2 weeks after the cyclone hit date and unexposed period was defined as the 2 weeks before the cyclone hit date                                                    | Low<br><br>The outcome data was obtained from the official reliable authorities and was defined using standard ICD codes                                    | Probably low<br><br>Natural variations was accounted for | Probably low<br><br>Outcome data was obtained from all the non-federal hospitals in the study area             | Probably low<br><br>The diagnosis in the data system for myocardial infarctions and stroke were supported in 91% and 89% of cases                        | Low<br><br>Focused on cardiovascular events and all the relevant findings for myocardial infarctions and strokes were reported                           | Low<br><br>Declared no competing financial interests                        | Probably low<br><br>Poisson regression was used with parameter estimates determined via generalized estimating equations with robust variances for repeated measures. No study protocol                                                                                                   |
| Kim et al. (2013) <sup>50</sup>          | Probably high<br><br>Exposed periods was defined as the cyclone period, which did not consider the different cyclone strength and length across cyclones and study areas, nor did account for the time-varying exposure | Low<br><br>The mortality data was obtained from the official reliable authorities and diagnosed via standard ICD code                                       | High<br><br>No confounders were adjusted                 | Low<br><br>All mortality data from study areas was obtained                                                    | Probably low<br><br>No sufficient information to evaluate the completeness of the outcome data, but the large sample size suggested a potential low risk | Low<br><br>Focused on infectious diarrhea and all the relevant findings were reported                                                                    | Probably high<br><br>No declaration of potential conflict of interest found | Probably high<br><br>Crude elevated risks associated with cyclones were derived based on a formula without any adjustment on potential confounders                                                                                                                                        |
| Frahm et al. (2013) <sup>51</sup>        | Probably high<br><br>Cyclone exposure was defined based on the cyclone track and hit date, which did not consider the different cyclone strength and length across cyclones and study areas                             | Low<br><br>The outcome data was obtained from the official reliable authorities and diagnosed via standard ICD code                                         | Probably high<br><br>No clear confounders were adjusted  | Low<br><br>All Florida veterans between October 2003 and September 2006 were studied                           | Probably low<br><br>No sufficient information to evaluate the completeness of the outcome data, but the large sample size suggested a potential low risk | Low<br><br>Focused on outpatient visits for posttraumatic stress disorder and substance use treatment and all the relevant findings were reported        | Probably high<br><br>No declaration of potential conflict of interest found | Probably high<br><br>Student's t test or Chi-square and a repeated measures linear mixed modelling approach without any clear adjustment was used. No study protocol                                                                                                                      |

|                                       |                                                                                                                                                                                                                                                                                                         |                                                                                                                                            |                                                                                                                                              |                                                                                                                                                                                                                            |                                                                                                                                                          |                                                                                                                                                                                                                                                                                  |                                                                             |                                                                                                                                                                                                                                                                                                                                          |
|---------------------------------------|---------------------------------------------------------------------------------------------------------------------------------------------------------------------------------------------------------------------------------------------------------------------------------------------------------|--------------------------------------------------------------------------------------------------------------------------------------------|----------------------------------------------------------------------------------------------------------------------------------------------|----------------------------------------------------------------------------------------------------------------------------------------------------------------------------------------------------------------------------|----------------------------------------------------------------------------------------------------------------------------------------------------------|----------------------------------------------------------------------------------------------------------------------------------------------------------------------------------------------------------------------------------------------------------------------------------|-----------------------------------------------------------------------------|------------------------------------------------------------------------------------------------------------------------------------------------------------------------------------------------------------------------------------------------------------------------------------------------------------------------------------------|
| Fullerton et al. (2013) <sup>52</sup> | Probably low<br><br>Exposure assessment was based on cyclone experience collected by self-reported questionnaire collected from each individual                                                                                                                                                         | Low<br><br>The outcome data was obtained from the official reliable authorities and diagnosed via well-established standard questionnaires | Probably low<br><br>Adjusted a series of confounders including gender, race, education, marital status, work demand                          | Probably low<br><br>Most of the study population participated in the study (77.5%).                                                                                                                                        | Probably high<br><br>A large percentage of the outcome data was excluded due to the missing data (34.9%)                                                 | Low<br><br>Focused on posttraumatic stress disorder, probable depression, and increased alcohol and/or tobacco use and all the relevant findings were reported                                                                                                                   | Probably high<br><br>No declaration of potential conflict of interest found | Probably low<br><br>Logistic regression was used to estimate the risk associated with cyclones, complemented by a series of secondary analyses. No study protocol                                                                                                                                                                        |
| Lin et al. (2013) <sup>53</sup>       | Probably high<br><br>Exposed period for different cyclones was defined as the 6 days after the cyclone hit date and unexposed period was defined as the 2 days before the cyclone hit date, which did not consider the different cyclone strength and length across cyclones and time-varying exposures | Low<br><br>The outcome data was obtained from the official reliable authorities and diagnosed by standard ICD code                         | Probably low<br><br>Adjusted a series of confounders including daily rainfall, the size of an ED, hospital contract type, weekdays, holidays | Low<br><br>The data of the study was retrieved from a database that covers over 99% of Taiwan's population.                                                                                                                | Probably low<br><br>10 out of 30 study hospitals with EDs were excluded due to a irregular ED service or small volumes of ED visits                      | Low<br><br>Focused on non-specific emergency department visits and all the relevant findings for both non-traumatic and common traumatic outcomes (e.g., fractures or dislocations of extremities, lacerations, superficial injuries and traumatic brain injuries) were reported | Probably high<br><br>No declaration of potential conflict of interest found | Probably low<br><br>Linear regression accounting for interactive effects among direct landfall, daily rainfall (heavy rain vs. light or no rain), intensity of typhoon landfall, and the yearly average of daily ED visits on the outcome variable was used. Inadequate information provided to judge the compliance with study protocol |
| Howard et al. (2012) <sup>54</sup>    | Probably low<br><br>Exposed period was defined as the 9-day period after the cyclone hit date and all the other days were defined as unexposed period                                                                                                                                                   | Low<br><br>The outcome data was obtained from the reliable clinics and identified using standard of 2008 Standard Analytical Files (SAF)   | Probably low<br><br>Adjusted a series of confounders including age, sex, race, Medicaid coverage, clinical characteristics                   | Probably high<br><br>The outcome data of hospitalization was obtained from Medicare billing records and hospital admissions can thus be observed only for those patients for whom Medicare is a primary or secondary payer | Probably low<br><br>No sufficient information to evaluate the completeness of the outcome data, but the large sample size suggested a potential low risk | Low<br><br>Focused on dialysis and all the relevant findings were reported                                                                                                                                                                                                       | Probably high<br><br>No declaration of potential conflict of interest found | Probably low<br><br>Cox proportional hazard models with a time-varying Hurricane Katrina indicator was used to identify the impact of Hurricane Katrina on hospitalization rates. No study protocol                                                                                                                                      |
| Mills et al. (2012) <sup>55</sup>     | Probably low<br><br>Exposure assessment was based on self-reported questionnaire collected from each individual                                                                                                                                                                                         | Probably low<br><br>The outcome data was obtained through a structured questionnaire by trained research assistants (possible recall bias) | Probably low<br><br>Adjusted a series of confounders including gender, material losses, health care need, death of loved                     | Probably low<br><br>The included participant showed good representativeness of the study population of emergency department                                                                                                | Probably low<br><br>Of the 908 eligible participants, 747 (82%) people completed the interview and were                                                  | Low<br><br>Focused on post-traumatic stress disorder and all the relevant findings were reported                                                                                                                                                                                 | Probably high<br><br>No declaration of potential conflict of                | Probably low<br><br>Logistic regression was used. Model fit was assessed with the Hosmer-Leme goodness-of-fit test.                                                                                                                                                                                                                      |

|                                    |                                                                                                                                                                                                                                   |                                                                                                                                                                                                         |                                                                                                                                                                                                                             |                                                                                                                 |                                                                                                                                                                                        |                                                                                                                                                             |                                                                             |                                                                                                                                                                                         |
|------------------------------------|-----------------------------------------------------------------------------------------------------------------------------------------------------------------------------------------------------------------------------------|---------------------------------------------------------------------------------------------------------------------------------------------------------------------------------------------------------|-----------------------------------------------------------------------------------------------------------------------------------------------------------------------------------------------------------------------------|-----------------------------------------------------------------------------------------------------------------|----------------------------------------------------------------------------------------------------------------------------------------------------------------------------------------|-------------------------------------------------------------------------------------------------------------------------------------------------------------|-----------------------------------------------------------------------------|-----------------------------------------------------------------------------------------------------------------------------------------------------------------------------------------|
|                                    |                                                                                                                                                                                                                                   |                                                                                                                                                                                                         | one                                                                                                                                                                                                                         | population during the cyclone period within the study area                                                      | included                                                                                                                                                                               |                                                                                                                                                             | interest found                                                              | The discriminatory power of the model was investigated by generating a receiver operating characteristic curve for the model and evaluating the area under the curve. No study protocol |
| Panda et al. (2011) <sup>56</sup>  | Probably low<br><br>Pre-cyclone (unexposed) and post-cyclone (exposed) period was defined on the basis of the cyclone hit date, while did not account for the time-varying cyclone exposures                                      | Low<br><br>The outcome data (in-patients with diarrhoea and rectal swabs) was obtained through reliable authorities and antibiotic sensitivity testing was performed based on a well-established method | Probably high<br><br>No clear confounders were adjusted                                                                                                                                                                     | Low<br><br>All the patients undergoing diarrhoea in the study district were studied                             | Low<br><br>The coverage for in-patients achieved was estimated to be 93%, showing a relatively high completeness                                                                       | Low<br><br>Focused on diarrhoea and all the relevant findings (e.g., causative organisms for diarrhoea and antibiotic susceptibility profile) were reported | Probably high<br><br>No declaration of potential conflict of interest found | Probably high<br><br>Crude elevated risks associated with cyclones were derived based on a formula without any adjustment on potential confounders                                      |
| Dosa et al. (2010) <sup>57</sup>   | Probably low<br><br>The exposed period and area was defined as the warning zone at 24 hours before landfall by National Weather Service, while did not account for the time-varying cyclone exposures                             | Low<br><br>The outcome data was obtained from officially reliable authorities                                                                                                                           | Probably high<br><br>No clear confounders were adjusted                                                                                                                                                                     | Low<br><br>All the residents living in two study locations were considered                                      | Low<br><br>123 out of 9383 (1.3%) participants who did not contribute data for all 3 years and for residents who could not be matched to their Medicare Denominator File were excluded | Low<br><br>Focused on the overall mortality, hospitalization, and functional decline and all the relevant findings were reported                            | Low<br><br>Declared no competing financial interests                        | Probably high<br><br>Crude elevated risks associated with cyclones were derived based on a formula without any adjustment on potential confounders                                      |
| Zahran et al. (2010) <sup>58</sup> | Probably high<br><br>The exposure for each individual was assessed based on a static point-in-time estimate of cyclone hit date, which may not account for different length and strength of cyclone across individuals accurately | Probably low<br><br>The outcome data was obtained from officially reliable authorities                                                                                                                  | Low<br><br>Adjusted a series of confounders including maternal Rh sensitization, diabetes, oligohydramnios, abruptio placenta, infant birth weight, infant cord prolapsed, maternal cigarette and alcohol use, maternal age | Probably low<br><br>A very large and representative sample of the pregnant women in the study area was included | Probably low<br><br>No sufficient information to evaluate the completeness of the outcome data, but the large sample size suggested a potential low risk                               | Low<br><br>Focused on fetal distress risk due to maternal exposure to Hurricane Andrew and all the relevant findings were reported                          | Probably high<br><br>No declaration of potential conflict of interest found | Probably low<br><br>Logistic regression was used to model fetal distress risk as a function of maternal exposure to Hurricane Andrew. No study protocol                                 |



|                                     |                                                                                                                                                                                                                                                                      |                                                                                                                                                                                                                                                       |                                                                                                                                                                    |                                                                                                                                                                                                                          |                                                                                                                                                                                |                                                                                                                                                    |                                                      |                                                                                                                                                                                                                                                                 |
|-------------------------------------|----------------------------------------------------------------------------------------------------------------------------------------------------------------------------------------------------------------------------------------------------------------------|-------------------------------------------------------------------------------------------------------------------------------------------------------------------------------------------------------------------------------------------------------|--------------------------------------------------------------------------------------------------------------------------------------------------------------------|--------------------------------------------------------------------------------------------------------------------------------------------------------------------------------------------------------------------------|--------------------------------------------------------------------------------------------------------------------------------------------------------------------------------|----------------------------------------------------------------------------------------------------------------------------------------------------|------------------------------------------------------|-----------------------------------------------------------------------------------------------------------------------------------------------------------------------------------------------------------------------------------------------------------------|
| Kutner et al. (2009) <sup>59</sup>  | Probably high<br><br>The exposure for each individual was assessed based on a static point-in-time estimate of cyclone hit date, which may not account for different length and strength of cyclone across individuals accurately                                    | Probably low<br><br>The outcome data was obtained from officially reliable authorities                                                                                                                                                                | Low<br><br>Adjusted a series of confounders including age, gender, race, income status, and clinical characteristics                                               | Probably low<br><br>The included patients represented 10% of the Katrina-affected study population and had similar demographic and clinical characteristics to the rest of the study population.                         | Probably low<br><br>No sufficient information to evaluate the completeness of the outcome data, but the large sample size suggested a potential low risk                       | Low<br><br>Focused on risk of mortality of dialysis patients due to exposure to Hurricane Katrina and all the relevant findings were reported      | Low<br><br>Declared no competing financial interests | Probably low<br><br>Cox proportional hazard models were used with a function of a time-varying Katrina indicator and adjustment for well-established demographic and clinical risk factors. Subgroup and sensitivity analyses were conducted. No study protocol |
| Burton et al. (2009) <sup>60</sup>  | Probably high<br><br>The exposure for each individual was assessed based on a static point-in-time estimate of cyclone hit date, which may not account for different length and strength of cyclone across individuals accurately                                    | Low<br><br>The mortality, morbidity, and disease and service utilization data were all obtained from officially reliable authorities and were determined by well-established criteria (i.e., ACGs) derived from standard ICD code                     | High<br><br>No confounders were account for                                                                                                                        | Probably Low<br><br>All non-institutionalized People Health (PH) enrollees (aged > 65 years) who lived in 4 parishes in the New Orleans metropolitan area served by PH providers before Hurricane Katrina were included. | Probably low<br><br>No sufficient information to evaluate the completeness of the outcome data, but the large sample size suggested a potential low risk                       | Low<br><br>Focused on mortality, morbidity, and disease and service utilization and all the relevant findings were reported                        | Low<br><br>Declared no competing financial interests | Probably high<br><br>Crude elevated rates after cyclones were derived based on a formula without any adjustment on potential confounders                                                                                                                        |
| Tees et al. (2009) <sup>61</sup>    | Probably low<br><br>Exposure assessment was based on self-reported questionnaire collected from each individual                                                                                                                                                      | Low<br><br>The birth records was obtained from reliable hospitals and the interviews were conducted by a research assistant. The mental health condition of mothers and infant temperament were measured via well-established standard questionnaires | Probably low<br><br>Adjusted a series of confounders including mother's age, infant's age, income level, marital status, smoking status prior to pregnancy, parity | Probably Low<br><br>All the women giving birth between February 2006 and May 2007 at two hospitals that served a wide selection of their respective metro areas of the study region were recruited                       | Probably high<br><br>292 out of 365 (80%) women completed the interview at 8–10 weeks postpartum. In other words, 20% of the participants were dropped out due to missing data | Low<br><br>Focused on maternal stress, maternal mental health, and early infant temperament and all the relevant findings were reported            | Low<br><br>Declared no competing financial interests | Probably low<br><br>Logistic regression was used with adjusting a series of potential confounders. No study protocol                                                                                                                                            |
| Fonseca et al. (2009) <sup>62</sup> | Probably high<br><br>The exposure for each individual was assessed based on a static point-in-time estimate of cyclone hit date, which may not account for different length and strength of cyclone across individuals accurately, nor did consider the time-varying | Probably low<br><br>The outcome data was obtained from officially reliable authorities                                                                                                                                                                | High<br><br>No confounders were account for                                                                                                                        | Low<br><br>All the adult patients with diabetes and an A1C measurement 6 months before Hurricane Katrina and 6-16 months after Hurricane Katrina were identified from databases were considered                          | Low<br><br>All the eligible patients seen at TUHC and MCLNO systems and 748 (out of 750, 99.7%) randomly selected patients were studied                                        | Probably low<br><br>Focused on diabetics and included and reported findings on a series of important indicators (level of A1C, blood pressure, and | Low<br><br>Declared no competing financial interests | Probably high<br><br>Crude elevated rates after cyclones were derived based on a formula without any adjustment on potential confounders                                                                                                                        |

|                                       |                                                                                                                                                                                                                                                                               |                                                                                                                                                                               |                                                                                                                                                                                                    |                                                                                                                               |                                                                                                                                                                 |                                                                                                                                                                            |                                                                             |                                                                                                                                                                                                                                 |
|---------------------------------------|-------------------------------------------------------------------------------------------------------------------------------------------------------------------------------------------------------------------------------------------------------------------------------|-------------------------------------------------------------------------------------------------------------------------------------------------------------------------------|----------------------------------------------------------------------------------------------------------------------------------------------------------------------------------------------------|-------------------------------------------------------------------------------------------------------------------------------|-----------------------------------------------------------------------------------------------------------------------------------------------------------------|----------------------------------------------------------------------------------------------------------------------------------------------------------------------------|-----------------------------------------------------------------------------|---------------------------------------------------------------------------------------------------------------------------------------------------------------------------------------------------------------------------------|
|                                       | exposure                                                                                                                                                                                                                                                                      |                                                                                                                                                                               |                                                                                                                                                                                                    |                                                                                                                               |                                                                                                                                                                 | lipids)                                                                                                                                                                    |                                                                             |                                                                                                                                                                                                                                 |
| Anastario et al. (2009) <sup>63</sup> | Probably high<br><br>The exposure for each individual was assessed based on a static point-in-time estimate of cyclone hit date, which may not account for different length and strength of cyclone across individuals accurately, nor did consider the time-varying exposure | Probably low<br><br>The outcome data was obtained from officially reliable authorities and via pilot tested structured questionnaires (possible recall bias)                  | High<br><br>No confounders were account for                                                                                                                                                        | Probably low<br><br>The participants were selected from the study population based on a systematic, random sampling procedure | Probably high<br><br>73 out of 123 (59.35%) sample sites were excluded in 2016 and 65 out of 134 (48.51%) sample sites were excluded due to data unavailability | Low<br><br>Focused on gender-based violence among women internally displaced in Mississippi 2 years post-hurricane Katrina and all the relevant findings were all reported | Low<br><br>Declared no competing financial interests                        | Probably high<br><br>Crude elevated rates after cyclones were derived based on a formula without any adjustment on potential confounders                                                                                        |
| Harville et al. (2009) <sup>64</sup>  | Probably low<br><br>Exposure assessment was based on self-reported questionnaire of cyclone experience collected from each individual                                                                                                                                         | Probably low<br><br>The outcome data was obtained from reliable hospitals and via standard recruitment questionnaires and phone interview at hospitals (possible recall bias) | Probably low<br><br>Adjusted a series of confounders including age, race, income, education, marital/partnership status, and parity                                                                | Probably high<br><br>The women were included from only two hospitals in the study area                                        | Probably high<br><br>292 out of 365 (80%) recruited women participated in the phone interview while 40% failed to complete during the follow-up                 | Low<br><br>Focused on postpartum mental health and all the relevant findings for depressive symptoms and PTSD symptoms were all reported                                   | Low<br><br>Declared no competing financial interests                        | Probably low<br><br>Loglinear/Poisson regression were used to model relative risks with control for potential confounders. Protocols were approved by the Institutional Review Boards of Tulane University and Woman's Hospital |
| Xiong (2008) <sup>65</sup>            | Probably low<br><br>Exposure assessment was based on self-reported questionnaire of cyclone experience collected from each individual                                                                                                                                         | Probably low<br><br>The outcome data was obtained from medical records in reliable hospitals and via interviews (possible recall bias)                                        | Probably low<br><br>Adjusted a series of confounders including maternal age, race, parity, education, marital status, smoking, alcohol consumption, family income, and history of low birth weight | Probably high<br><br>The women were included from only two hospitals in the study area                                        | Low<br><br>No outcome data was excluded inappropriately                                                                                                         | Low<br><br>Focused on PTSD and birth outcomes and all the relevant findings for PTSD symptoms, preterm birth, and low birth weight were reported                           | Probably high<br><br>No declaration of potential conflict of interest found | Probably low<br><br>Chi-square tests were used to examine differences in proportions and logistic regression was used to adjust for the effects of confounding variables. No study protocol                                     |
| Kessler et al. (2006) <sup>66</sup>   | Probably high<br><br>The exposure for each individual was assessed based on a static point-in-time estimate of cyclone hit date, which may not account for different length and strength of cyclone across individuals accurately                                             | Probably low<br><br>The outcome data was obtained from official reliable authorities via surveys based on well-established screening scale                                    | High<br><br>No confounders were account for                                                                                                                                                        | Probably high<br><br>The eligible adults were included from only two Census Divisions in the study area                       | Probably high<br><br>Around 29% of the outcome data was excluded due to missing data                                                                            | Low<br><br>Focused on mental illness and suicidality and all the relevant findings were reported                                                                           | Low<br><br>Declared no competing financial interests                        | Probably low<br><br>Logistic regression was used to assess the sociodemographic variation in between-survey differences. No study protocol                                                                                      |
| Fried et al.                          | Probably low                                                                                                                                                                                                                                                                  | Probably low                                                                                                                                                                  | Probably low                                                                                                                                                                                       | Low                                                                                                                           | Low                                                                                                                                                             | Low                                                                                                                                                                        | Probably                                                                    | Probably low                                                                                                                                                                                                                    |

|                                           |                                                                                                                                                                                                                                   |                                                                                                                                                                                                     |                                                                                                                         |                                                                                                                                                                                                                                              |                                                                                                                           |                                                                                                                                                                             |                                                                             |                                                                                                                                                    |
|-------------------------------------------|-----------------------------------------------------------------------------------------------------------------------------------------------------------------------------------------------------------------------------------|-----------------------------------------------------------------------------------------------------------------------------------------------------------------------------------------------------|-------------------------------------------------------------------------------------------------------------------------|----------------------------------------------------------------------------------------------------------------------------------------------------------------------------------------------------------------------------------------------|---------------------------------------------------------------------------------------------------------------------------|-----------------------------------------------------------------------------------------------------------------------------------------------------------------------------|-----------------------------------------------------------------------------|----------------------------------------------------------------------------------------------------------------------------------------------------|
| (2005) <sup>67</sup>                      | Exposed period of the study area was defined as the 12 months after the Hurricane Floyd hit date and unexposed period was defined as the 14 months before the Hurricane Floyd hit date                                            | The outcome data was obtained from official reliable authorities                                                                                                                                    | Time trend and time invariant county characteristics was controlled using a difference in difference modelling approach | All the Medicaid population in North Carolina were considered                                                                                                                                                                                | No exclusions were made for continuous enrolment or other enrollee characteristics                                        | Focused on utilization of mental health services after hurricane Floyd and all the relevant findings were reported                                                          | high<br>No declaration of potential conflict of interest found              | Difference-in-differences analysis with linear regression was used with robust standard errors reported. No study protocol                         |
| Keenan et al. (2004) <sup>68</sup>        | Probably low<br><br>Exposed period of the study area was defined as the 6 months after the Hurricane Floyd hit date and unexposed period was defined as the period before the Hurricane Floyd hit date                            | Low<br><br>The outcome data was retrospectively obtained from official reliable authorities and prospectively collected as a part of an ongoing project and were defined based on standard ICD code | Probably low<br><br>Adjusted a series of confounders including county risk level, exposure period, race, age            | Probably low<br><br>The eligible children were included from all hospitals in the study area during the study period                                                                                                                         | Low<br><br>No outcome data was excluded inappropriately                                                                   | Low<br><br>Focused on inflicted traumatic brain injury in children and all the relevant findings were reported                                                              | Probably high<br><br>No declaration of potential conflict of interest found | Probably low<br><br>Poisson regression was used to compare the risks in the exposed period with the unexposed period                               |
| Sanders et al. (1999) <sup>69</sup>       | Probably high<br><br>The exposure for each individual was assessed based on a static point-in-time estimate of cyclone hit date, which may not account for different length and strength of cyclone across individuals accurately | Low<br><br>The outcome data was obtained via laboratory testing and defined based on well-established standard criteria                                                                             | High<br><br>No confounders were account for                                                                             | Probably low<br><br>Medical records of the study area were obtained from a series of medical authorities including public health clinics, public and private hospitals, laboratories, and private physicians' offices throughout Puerto Rico | Low<br><br>No outcome data was excluded inappropriately                                                                   | Low<br><br>Focused on leptospirosis in dengue-negative patients and all the relevant findings were reported                                                                 | Probably high<br><br>No declaration of potential conflict of interest found | Probably high<br><br>Crude elevated risks associated with cyclones were derived based on a formula without any adjustment on potential confounders |
| Hendrickson et al. (1997) <sup>70</sup>   | Probably low<br><br>Exposed period of the study area was defined as the 2 weeks after the Hurricane Iniki hit date and unexposed period was defined as the 2-week period before the Hurricane Iniki hit date                      | Low<br><br>Outcome data was obtained from medical authorities and the study outcomes were defined based on standard ICD code                                                                        | Probably high<br><br>The time trend, seasonality and day of week effects were all not accounted for                     | Probably low<br><br>Medical records of the study area were obtained from a series of medical authorities including multispecialty medical groups, family practice clinics, and paediatricians, and emergency departments                     | Probably low<br><br>Medical records with an incomplete address and unknown resident status (10.8%)                        | Probably low<br><br>Included a series of morbidity-related outcomes including injury, cardiovascular and asthma-related physician visits and reported all relevant findings | Probably high<br><br>No declaration of potential conflict of interest found | Probably high<br><br>Crude elevated risks associated with cyclones were derived based on a formula without any adjustment on potential confounders |
| Hendrickson and Vogt (1996) <sup>71</sup> | Probably low<br><br>Exposed period of the study area was defined as the 1 year after the Hurricane Iniki hit date and unexposed period was defined as the 5-year period before the Hurricane                                      | Low<br><br>Outcome data was obtained from official sources and the study outcomes were defined based on standard ICD code                                                                           | High<br><br>No confounders were account for                                                                             | Low<br><br>All mortality records were obtained from the study area of Kauai during the study period                                                                                                                                          | Probably low<br><br>No sufficient information to evaluate the completeness of the outcome data, but the large sample size | Probably low<br><br>A series of cause-specific mortality outcomes including mortality from diabetes, heart disease,                                                         | Probably high<br><br>No declaration of potential conflict of interest       | Probably high<br><br>Crude elevated risks associated with cyclones were derived based on a formula without any adjustment on                       |

|                                      |                                                                                                                                       |                                                                                                                                                                      |                                                                                                 |                                                                                                                                                    |                                                         |                                                                                                                                                |                                                                             |                                                                                                                                                                                                                                                    |
|--------------------------------------|---------------------------------------------------------------------------------------------------------------------------------------|----------------------------------------------------------------------------------------------------------------------------------------------------------------------|-------------------------------------------------------------------------------------------------|----------------------------------------------------------------------------------------------------------------------------------------------------|---------------------------------------------------------|------------------------------------------------------------------------------------------------------------------------------------------------|-----------------------------------------------------------------------------|----------------------------------------------------------------------------------------------------------------------------------------------------------------------------------------------------------------------------------------------------|
|                                      | Iniki hit date, while did not account for the time-varying cyclone exposure                                                           |                                                                                                                                                                      |                                                                                                 |                                                                                                                                                    | suggested a potential low risk                          | stroke, cancer, injury, respiratory diseases were included and reported in the study, though the associations were statistically insignificant | found                                                                       | potential confounders                                                                                                                                                                                                                              |
| Garrison et al. (1993) <sup>72</sup> | Probably low<br><br>Exposure assessment was based on self-reported questionnaire of cyclone experience collected from each individual | Probably low<br><br>The outcome data was collected via well-established self-administered questionnaire by trained research assistants but the recall bias may occur | Probably low<br><br>Sex, race, and other traumatic events exposure were controlled in the model | Probably high<br><br>The eligible students were included from only three schools and no clear information on how these three schools were selected | Low<br><br>No outcome data was excluded inappropriately | Low<br><br>Focused on PTSD in adolescents and all the relevant findings were reported                                                          | Probably high<br><br>No declaration of potential conflict of interest found | Probably low<br><br>A series of logistic regression analyses were used to explore the relation between exposure to the hurricane and PTSD. A backward stepwise elimination procedure was performed to determine the final model. No study protocol |

Abbreviations: A1C, glycemic control; ACGs, adjusted clinical groups; BMI, body mass index; CCS, Clinical Classifications Software; COPD, chronic obstructive pulmonary disease; ED, emergency department; FEMA, Federal Emergency Management Agency; ICD, International Classification of Diseases; MCLNO, Medical Center of Louisiana at New Orleans; PTSD, post-traumatic stress disorder; TUHC, Tulane University Hospital and Clinic.

**TableS6:** Summary of the studies included in meta-analysis and sensitivity analysis by excluding each effect estimate in turn.

| Study                                     | Included cyclone(s)        | Study population                      | RR (95% CI) <sup>a</sup> | Weight | meta-RR (95% CI) <sup>b</sup> |
|-------------------------------------------|----------------------------|---------------------------------------|--------------------------|--------|-------------------------------|
| <b>All-cause mortality</b>                |                            |                                       |                          |        |                               |
| Quast et al. (2019) <sup>30</sup>         | Hurricane Katrina and Rita | Participants with diabetes            | 1.10 (1.08,1.12)         | 18.5   | 1.09 (1.02,1.15)              |
| Kutner et al. (2009) <sup>59</sup>        | Hurricane Katrina          | Participants with dialysis            | 0.98 (0.86,1.11)         | 13.2   | 1.10 (1.05,1.14)              |
| Dosa et al. (2020) <sup>25</sup>          | Hurricane Irma             | General population ( $\geq$ 65 years) | 1.12 (1.05,1.18)         | 17.2   | 1.08 (1.03,1.14)              |
| Kim et al. (2017) <sup>36</sup>           | Hurricane Sandy            | General population ( $\geq$ 76 years) | 1.07 (1.05,1.10)         | 18.4   | 1.09 (1.03,1.16)              |
| Cruz-Cano and Mead (2019) <sup>31</sup>   | Hurricane Maria            | General population (All ages)         | 1.25 (1.13,1.40)         | 14.5   | 1.08 (0.91,1.27)              |
| Kim et al. (2013) <sup>50</sup>           | Three TCs                  | General population (All ages)         | 1.04 (1.01,1.07)         | 18.2   | 1.10 (1.05,1.15)              |
| Overall                                   | -                          | -                                     | 1.09 (1.04,1.13)         | 100    | -                             |
| <b>Heart disease mortality</b>            |                            |                                       |                          |        |                               |
| Cruz-Cano and Mead (2019) <sup>31</sup>   | Hurricane Maria            | General population (All ages)         | 1.29 (1.12,1.53)         | 29.6   | 1.08 (0.91,1.27)              |
| Quast et al. (2019) <sup>30</sup>         | Hurricane Katrina and Rita | Participants with diabetes            | 1.15 (1.11,1.19)         | 46.2   | 1.09 (1.02,1.15)              |
| Hendrickson and Vogt (1996) <sup>71</sup> | Hurricane Iniki            | General population (All ages)         | 0.96 (0.79,1.17)         | 24.2   | 1.19 (1.07,1.32)              |
| Overall                                   | -                          | -                                     | 1.14 (0.99,1.30)         | 100    | -                             |
| <b>Diabetes mortality</b>                 |                            |                                       |                          |        |                               |
| Cruz-Cano and Mead (2019) <sup>31</sup>   | Hurricane Maria            | General population (All ages)         | 1.41 (1.15,1.84)         | 30.1   | 1.08 (0.91,1.27)              |
| Quast et al. (2019) <sup>30</sup>         | Hurricane Katrina and Rita | Participants with diabetes            | 0.91 (0.85,0.98)         | 62.7   | 1.09 (1.02,1.15)              |
| Hendrickson and Vogt (1996) <sup>71</sup> | Hurricane Iniki            | General population (All ages)         | 2.61 (1.44,4.74)         | 7.3    | 1.19 (1.07,1.32)              |
| Overall                                   | -                          | -                                     | 1.41 (0.80,2.47)         | 100    | -                             |
| <b>All-cause hospitalization</b>          |                            |                                       |                          |        |                               |
| Bell et al. (2021) <sup>13</sup>          | Hurricane Frances          | General population ( $\geq$ 65 years) | 1.15 (1.13,1.17)         | 10.3   | 1.18 (1.12,1.26)              |
| Bell et al. (2021) <sup>13</sup>          | Hurricane Ivan             | General population ( $\geq$ 65 years) | 1.20 (1.18,1.22)         | 10.3   | 1.18 (1.11,1.25)              |
| Bell et al. (2021) <sup>13</sup>          | Hurricane Katrina          | General population ( $\geq$ 65 years) | 1.20 (1.16,1.24)         | 10.1   | 1.18 (1.11,1.25)              |
| Bell et al. (2021) <sup>13</sup>          | Hurricane Wilma            | General population ( $\geq$ 65 years) | 1.25 (1.22,1.28)         | 10.2   | 1.17 (1.11,1.24)              |
| Bell et al. (2021) <sup>13</sup>          | Hurricane Rita             | General population ( $\geq$ 65 years) | 1.16 (1.14,1.17)         | 10.3   | 1.18 (1.11,1.26)              |
| Bell et al. (2021) <sup>13</sup>          | Hurricane Ike              | General population ( $\geq$ 65 years) | 1.22 (1.19,1.26)         | 10.1   | 1.18 (1.11,1.25)              |
| Bell et al. (2021) <sup>13</sup>          | Hurricane Irene            | General population ( $\geq$ 65 years) | 1.15 (1.13,1.17)         | 10.3   | 1.18 (1.12,1.26)              |
| Bell et al. (2021) <sup>13</sup>          | Hurricane Sandy            | General population ( $\geq$ 65 years) | 1.37 (1.34,1.39)         | 10.3   | 1.16 (1.11,1.22)              |
| Sharp et al. (2016) <sup>41</sup>         | Hurricane Sandy            | General population (All ages)         | 0.98 (0.95,1.01)         | 10.2   | 1.21 (1.16,1.25)              |

|                                          |                                  |                                       |                  |      |                  |
|------------------------------------------|----------------------------------|---------------------------------------|------------------|------|------------------|
| Howard et al. (2012) <sup>54</sup>       | Hurricane Katrina                | Participants with dialysis            | 1.16 (1.05,1.29) | 7.9  | 1.18 (1.12,1.25) |
| Overall                                  | —                                | —                                     | 1.18 (1.12,1.25) | 100  | —                |
| <b>RESP hospitalization</b>              |                                  |                                       |                  |      |                  |
| Van Loenhout et al. (2018) <sup>35</sup> | Typhoon Haiyan                   | General population (All ages)         | 1.75 (1.01,3.03) | 4.9  | 1.15 (1.13,1.18) |
| Parks et al. (2021) <sup>21</sup>        | All TCs hit US between 1999–2014 | General population ( $\geq$ 65 years) | 1.14 (1.10,1.18) | 47.3 | 1.18 (0.96,1.45) |
| Yan et al. (2021) <sup>22</sup>          | 74 Atlantic-basin TCs            | General population ( $\geq$ 65 years) | 1.16 (1.13,1.20) | 47.8 | 1.31 (0.87,1.99) |
| Overall                                  | —                                | —                                     | 1.15 (1.13,1.18) | 100  | —                |
| <b>COPD hospitalization</b>              |                                  |                                       |                  |      |                  |
| Bell et al. (2022) <sup>4</sup>          | Eight large-scale hurricanes     | General population ( $\geq$ 65 years) | 1.06 (1.04,1.08) | 35.4 | 1.37 (1.25,1.51) |
| Parks et al. (2021) <sup>21</sup>        | All TCs hit US between 1999–2014 | General population ( $\geq$ 65 years) | 1.44 (1.37,1.54) | 32.4 | 1.18 (0.96,1.45) |
| Yan et al. (2021) <sup>22</sup>          | 74 Atlantic-basin TCs            | General population ( $\geq$ 65 years) | 1.31 (1.23,1.39) | 32.2 | 1.31 (0.87,1.99) |
| Overall                                  | —                                | —                                     | 1.26 (1.05,1.50) | 100  | —                |
| <b>Preterm birth</b>                     |                                  |                                       |                  |      |                  |
| Meir et al. (2021) <sup>20</sup>         | Hurricane Katrina                | Pregnant women                        | 1.02 (0.88,1.18) | 22.3 | 1.11 (0.87,1.41) |
| Antipova and Curtis (2015) <sup>48</sup> | Hurricane Andrew                 | Pregnant women                        | 1.43 (1.26,1.62) | 23.7 | 1.01 (0.99,1.03) |
| Sun et al. (2020) <sup>27</sup>          | 58 TCs                           | Pregnant women                        | 1.01 (0.99,1.03) | 28.2 | 1.12 (0.87,1.43) |
| Harville et al. (2022) <sup>8</sup>      | Hurricane Michael                | Pregnant women                        | 0.96 (0.88,1.05) | 25.7 | 1.13 (0.91,1.42) |
| Overall                                  | —                                | —                                     | 1.09 (0.91,1.29) | 100  | —                |

<sup>a</sup>Relative risks of the health outcome after the cyclone exposures

<sup>b</sup>Meta-relative risks for the health outcome after excluding the estimate

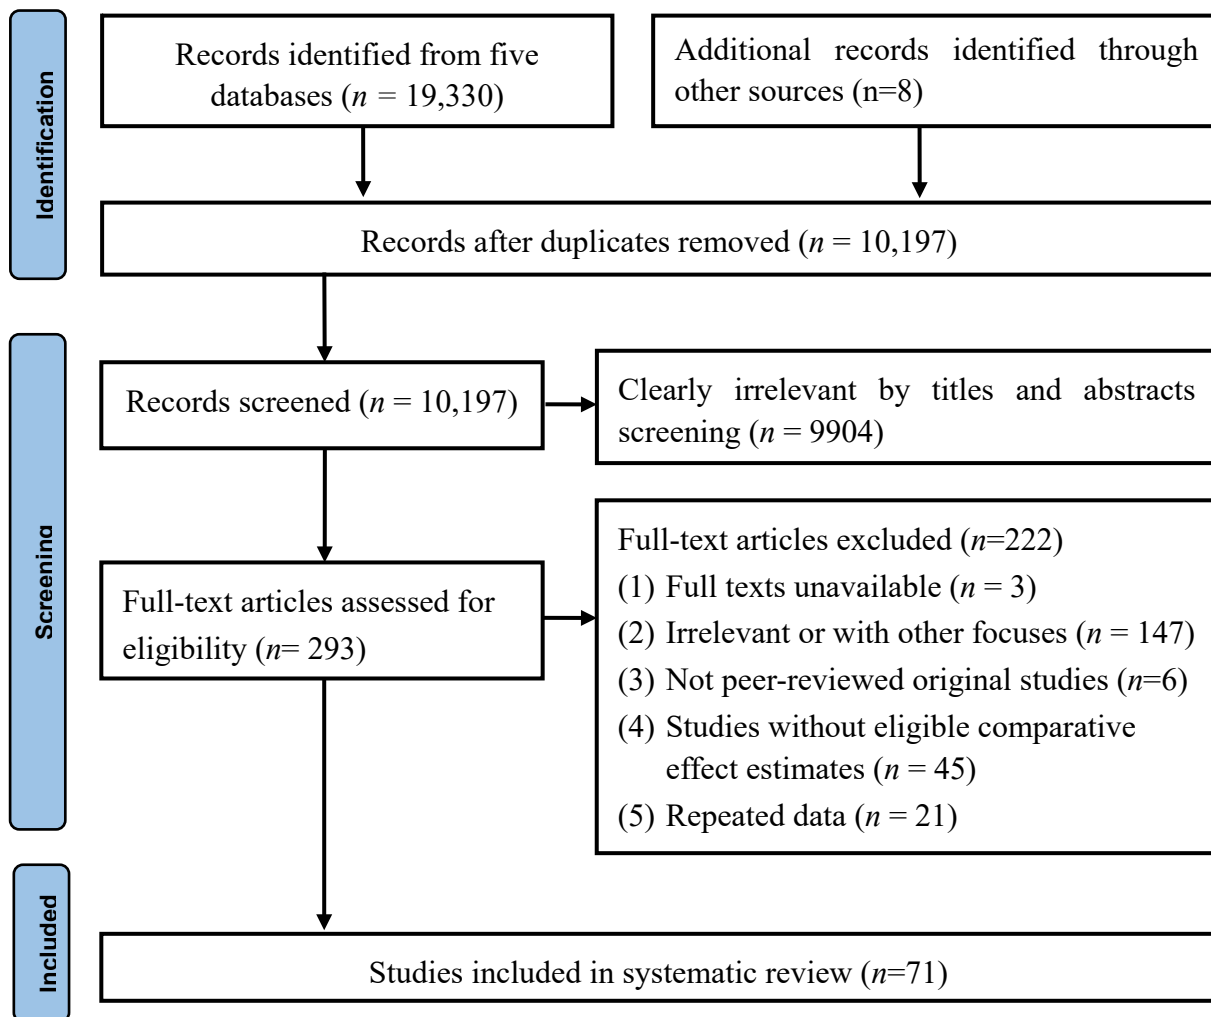

**Figure S1.** Flowchart of the study selection

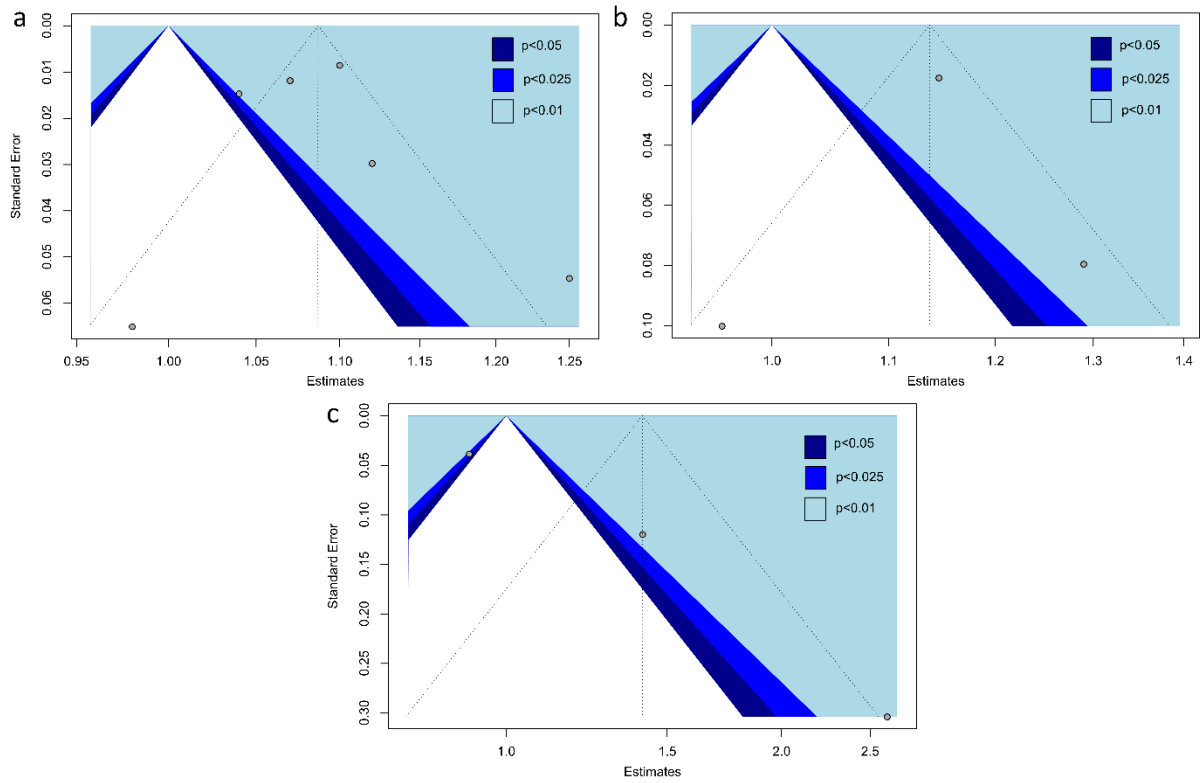

**Fig.S2** Contour-enhanced funnel plot analysis on the detection of publication bias in the meta-analysis of the association between cyclone exposures and all-cause (a), heart disease (b) and diabetes (c) mortality, with background color indicating the significance of the studies ( $P \geq 0.05$ : white background;  $P < 0.05$ : dark blue;  $P < 0.025$ : blue;  $P < 0.01$ : light blue)



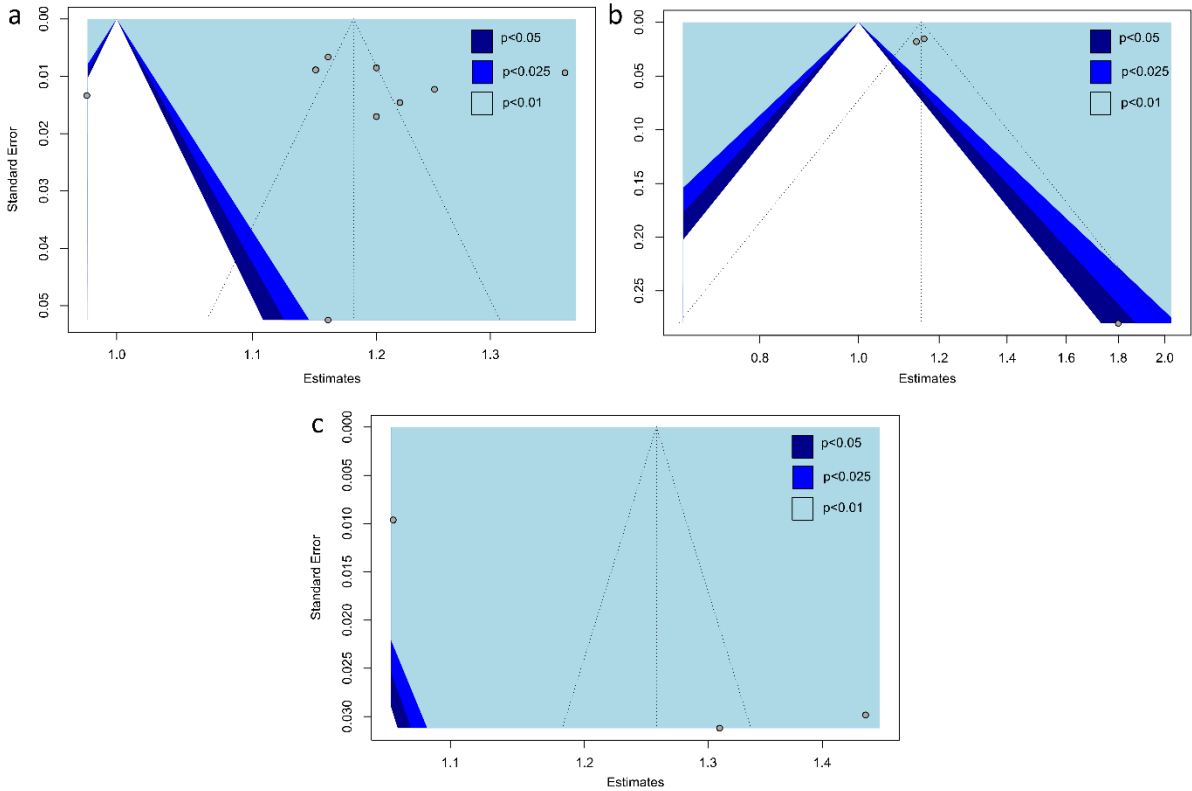

**Fig.S3** Contour-enhanced funnel plot analysis on the detection of publication bias in the meta-analysis of the association between cyclone exposures and all-cause hospitalization (a), respiratory hospitalization (b) and chronic obstructive pulmonary disease hospitalization, with background color indicating the significance of the studies ( $P \geq 0.05$ : white background;  $P < 0.05$ : dark blue;  $P < 0.025$ : blue;  $P < 0.01$ : light blue)

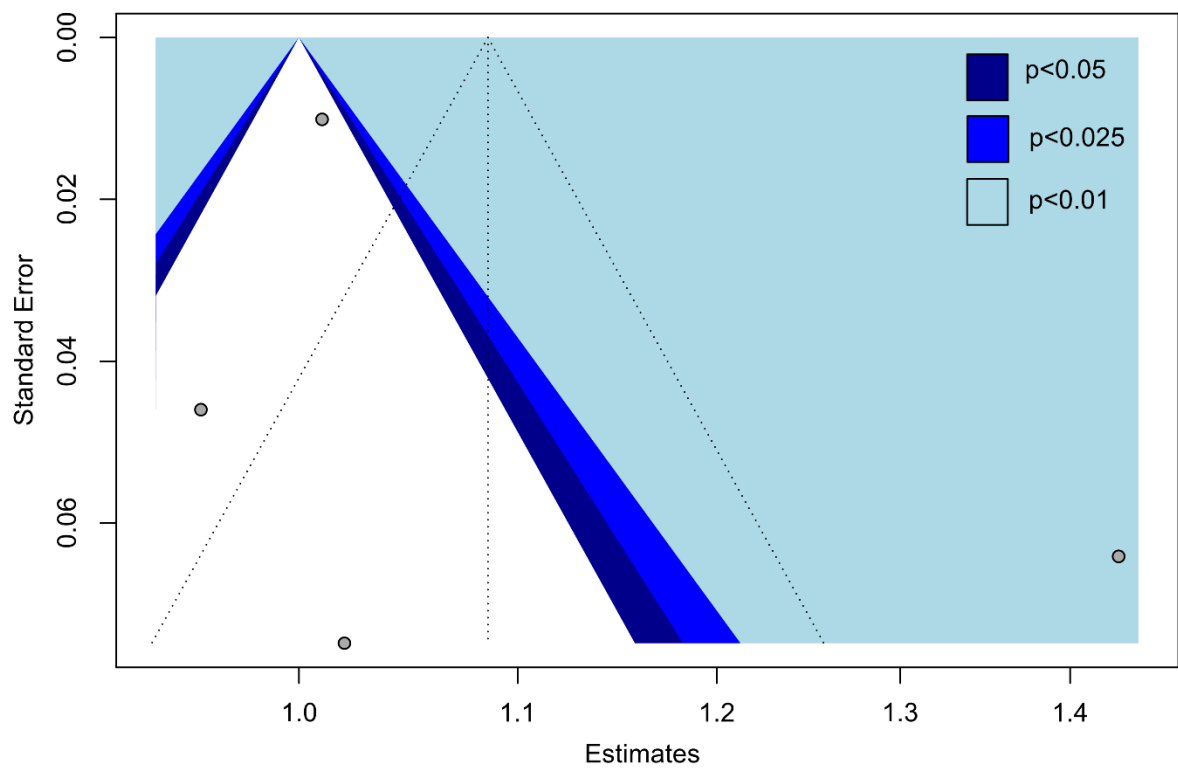

**Fig.S4** Contour-enhanced funnel plot analysis on the detection of publication bias in the meta-analysis of the association between cyclone exposures and preterm birth, with background color indicating the significance of the studies ( $P \geq 0.05$ : white background;  $P < 0.05$ : dark blue;  $P < 0.025$ : blue;  $P < 0.01$ : light blue)

## References:

1. The Office of Health Assessment and Translation (OHAT), OHAT Division of the National Toxicology Program. <https://ntp.niehs.nih.gov/whatwestudy/assessments/noncancer/riskbias>
2. Begum TF, Lin Z, Primeau M, Lin S. Assessing short-term and long-term mental health effects among older adults after Hurricane Sandy. *Sci Total Environ.* 2022;153753. doi:<https://dx.doi.org/10.1016/j.scitotenv.2022.153753> PMID:35151740
3. Parks RM, Benavides J, Anderson GB, et al. Association of tropical cyclones with county-level mortality in the US. *JAMA.* 2022;327(10):946-955. doi:<https://doi.org/10.1001/jama.2022.1682> PMID:35258534
4. Bell SA, Donnelly JP, Li W, Davis MA. Hospitalizations for chronic conditions following hurricanes among older adults: A self-controlled case series analysis. *J Am Geriatr Soc.* 2022;doi:<https://dx.doi.org/10.1111/jgs.17702> PMID:35171505
5. Quist AJ, Fliss MD, Wade TJ, Delamater PL, Richardson DB, Engel LS. Hurricane flooding and acute gastrointestinal illness in North Carolina. *Sci Total Environ.* 2022;809:151108. doi:<https://doi.org/10.1016/j.scitotenv.2021.151108> PMID:34688737
6. Sands LP, Do Q, Du P, Pruchno R. Peritraumatic Stress From a Disaster Increases Risk for Onset of Chronic Diseases Among Older Adults. *Innov Aging.* 2022;6(1):igab052. doi:<https://dx.doi.org/10.1093/geroni/igab052> PMID:34993355
7. Cortes YI, Lassalle PP, Perreira KM. Health Care Access and Health Indicators in Puerto Rico Pre- and Post- Hurricane Maria: Behavioral Risk Factor Surveillance System (2015-2019). *J Immigr Minor Health.* Aug 10 2022;doi:<https://doi.org/10.1007/s10903-022-01391-z> PMID:35948823
8. Harville EW, Pan K, Beitsch L, et al. Hurricane Michael and Adverse Birth Outcomes in the Florida Panhandle: Analysis of Vital Statistics Data. *Disaster Med Public Health Prep.* Mar 3 2022:1-8. doi:<https://doi.org/10.1017/dmp.2021.367> PMID:35236537
9. Acosta RJ, Irizarry RA. A Flexible Statistical Framework for Estimating Excess Mortality. *Epidemiology.* MAY 2022;33(3):346-353. doi:<https://doi.org/10.1097/EDE.0000000000001445> PMID:35383642
10. Hochard J, Li Y, Abashidze N. Associations of hurricane exposure and forecasting with impaired birth outcomes. *Nat Commun.* Nov 8 2022;13(1):6746. doi:<https://doi.org/10.1038/s41467-022-33865-x> PMID:36347839
11. Li C, Zhao Z, Yan Y, Liu Q, Zhao Q, Ma W. Short-term effects of tropical cyclones on the incidence of dengue: a time-series study in Guangzhou, China. *Parasit Vectors.* Oct 6 2022;15(1):358. doi:<https://doi.org/10.1186/s13071-022-05486-2> PMID:36203178
12. Parayiwa C, Harley D, Clark R, Behie A, Lal A. Association between severe cyclone events and birth outcomes in Queensland, Australia, 2008-2018: a population based retrospective cohort study. *Aust N Z J Public Health.* Dec 2022;46(6):835-841. doi:<https://doi.org/10.1111/1753-6405.13273> PMID:35735907
13. Bell SA, Iwashyna TJ, Zhang X, Chen B, Davis MA. All-Cause Hospitalizations after Large-Scale Hurricanes among Older Adults: A Self-Controlled Case Series Study. *Prehosp Disaster Med.* 2021;36(1):25-31. doi:<https://dx.doi.org/10.1017/S1049023X20001387> PMID:33198843
14. Weinberger KR, Kulick ER, Boehme AK, Sun S, Dominici F, Wellenius GA. Association Between Hurricane Sandy and Emergency Department Visits in New York City by Age and Cause. *Am J Epidemiol.*

2021;190(10):2138-2147. doi:<https://dx.doi.org/10.1093/aje/kwab127> PMID:33910231

15. Cowan KN, Pennington AF, Sircar K, Flanders WD. Asthma-Related Emergency Department Visits in North Carolina Following Hurricane Irene. *Disaster Med Public Health Prep.* 2021;1-4.

doi:<https://dx.doi.org/10.1017/dmp.2021.143> PMID:34165061

16. McCann-Pineo M, Taioli E, Schwartz RM. Exposure to Hurricane Sandy and Risk of Opioid Abuse. *Subst Use Misuse.* 2021;56(8):1241-1245. doi:<https://dx.doi.org/10.1080/10826084.2021.1912098>

PMID:33870867

17. Zacher M, Raker EJ, Arcaya MC, Lowe SR, Rhodes J, Waters MC. Physical Health Symptoms and Hurricane Katrina: Individual Trajectories of Development and Recovery More Than a Decade After the Storm. *Am J Public Health.* 2021;111(1):127-135. doi:<https://dx.doi.org/10.2105/AJPH.2020.305955> PMID:33211584

18. Li C, Zhao Q, Zhao Z, Liu Q, Ma W. The association between tropical cyclones and dengue fever in the Pearl River Delta, China during 2013-2018: A time-stratified case-crossover study. *PLoS Negl Trop Dis.*

2021;15(9):e0009776. doi:<https://dx.doi.org/10.1371/journal.pntd.0009776> PMID:34499666

19. Bozick R. The effects of Hurricane Harvey on the physical and mental health of adults in Houston.

*Health Place.* 2021;72:102697. doi:<https://dx.doi.org/10.1016/j.healthplace.2021.102697> PMID:34700063

20. Meir O, Satu K, Xie X, Abdissa N, Lubna P, Sangita J. The impact of Hurricane Katrina, a major natural disaster, on assisted reproductive outcomes through an analysis of 451,848 ART cycles. *Sci Rep.*

2021;11(1):17864. doi:<https://dx.doi.org/10.1038/s41598-021-97402-4> PMID:34504216

21. Parks RM, Anderson GB, Nethery RC, Navas-Acien A, Dominici F, Kioumourtzoglou M-A. Tropical cyclone exposure is associated with increased hospitalization rates in older adults. *Nat Commun.*

2021;12(1):1545. doi:<https://dx.doi.org/10.1038/s41467-021-21777-1> PMID:33750775

22. Yan M, Wilson A, Dominici F, et al. Tropical Cyclone Exposures and Risks of Emergency Medicare Hospital Admission for Cardiorespiratory Diseases in 175 Urban United States Counties, 1999-2010.

*Epidemiology.* 2021;32(3):315-326. doi:<https://dx.doi.org/10.1097/EDE.0000000000001337> PMID:33591048

23. Nethery RC, Katz-Christy N, Kioumourtzoglou M-A, Parks RM, Schumacher A, Anderson GB.

Integrated causal-predictive machine learning models for tropical cyclone epidemiology. *Biostatistics.*

2021;doi:<https://dx.doi.org/10.1093/biostatistics/kxab047> PMID:34962265

24. de Oliveira VH, Lee I, Quintana-Domeque C. Natural disasters and early human development:

Hurricane Catarina and infant health in Brazil. *J Hum Resour.* 2021:0816-8144R1.

doi:<https://doi.org/10.3368/jhr.59.1.0816-8144R1>

25. Dosa DM, Skarha J, Peterson LJ, et al. Association Between Exposure to Hurricane Irma and Mortality and Hospitalization in Florida Nursing Home Residents. *JAMA Netw Open.* 2020;3(10):e2019460.

doi:<https://dx.doi.org/10.1001/jamanetworkopen.2020.19460> PMID:33021652

26. Kanaoka K, Okayama S, Terasaki S, et al. Role of climatic factors in the incidence of Takotsubo syndrome: A nationwide study from 2012 to 2016. *ESC Heart Failure.* 2020;7(5):2629-2636.

doi:<https://dx.doi.org/10.1002/ehf2.12843> PMID:32715646

27. Sun S, Weinberger KR, Yan M, Anderson GB, Wellenius GA. Tropical cyclones and risk of preterm birth: A retrospective analysis of 20 million births across 378 US counties. *Environ Int.* 2020;140:105825.

doi:<https://dx.doi.org/10.1016/j.envint.2020.105825> PMID:32485474

28. Schwartz RM, Rasul R, Gargano LM, Lieberman-Cribbin W, Brackbill RM, Taioli E. Examining Associations Between Hurricane Sandy Exposure and Posttraumatic Stress Disorder by Community of Residence. *J Trauma Stress*. 2019;32(5):677-687. doi:<https://dx.doi.org/10.1002/jts.22445> PMID:31487410
29. An R, Qiu Y, Xiang X, Ji M, Guan C. Impact of Hurricane Katrina on Mental Health among US Adults. *Am J Health Behav*. 2019;43(6):1186-1199. doi:<https://dx.doi.org/10.5993/AJHB.43.6.15> PMID:31662176
30. Quast T, Andel R, Sadhu AR. Long-term Effects of Disasters on Seniors With Diabetes: Evidence From Hurricanes Katrina and Rita. *Diabetes Care*. 2019;42(11):2090-2097. doi:<https://dx.doi.org/10.2337/dc19-0567> PMID:31548250
31. Cruz-Cano R, Mead EL. Causes of excess deaths in Puerto Rico after Hurricane Maria: a time-series estimation. *Am J Public Health*. 2019;109(7):1050-1052. doi:<https://doi.org/10.2105/AJPH.2019.305015> PMID:30998411
32. Kontoyiannis DP, Shah EC, Wurster S, et al. Culture-Documented Invasive Mold Infections at MD Anderson Cancer Center in Houston, Texas, Pre- and Post-Hurricane Harvey. *Open Forum Infect Dis*. 2019;6(4):ofz138. doi:<https://dx.doi.org/10.1093/ofid/ofz138> PMID:31024975
33. Lawrence WR, Lin Z, Lipton EA, et al. After the Storm: Short-term and Long-term Health Effects Following Superstorm Sandy among the Elderly. *Disaster Med Public Health Prep*. Feb 2019;13(1):28-32. doi:<https://doi.org/10.1017/dmp.2018.152> PMID:30841951
34. Ekperi LI, Thomas E, LeBlanc TT, et al. The Impact of Hurricane Sandy on HIV Testing Rates: An Interrupted Time Series Analysis, January 1, 2011–December 31, 2013. *PLoS currents*. 2018 Sep 2018;10doi:<https://doi.org/10.1371/currents.dis.ea09f9573dc292951b7eb0cf9f395003> PMID:30338170
35. Van Loenhout JAF, Cuesta JG, Abello JE, Isiderio JM, De Lara-Banquesio ML, Guha-Sapir D. The impact of typhoon haiyan on admissions in two hospitals in eastern visayas, philippines. *PLoS One*. 2018;13(1):e0191516. doi:<http://dx.doi.org/10.1371/journal.pone.0191516> PMID:29381720
36. Kim S, Kulkarni PA, Rajan M, et al. Hurricane Sandy (New Jersey): Mortality Rates in the Following Month and Quarter. *Am J Public Health*. 2017;107(8):1304-1307. doi:<https://dx.doi.org/10.2105/AJPH.2017.303826> PMID:28640678
37. Bromet EJ, Clouston S, Gonzalez A, Kotov R, Guerrera KM, Luft BJ. Hurricane Sandy Exposure and the Mental Health of World Trade Center Responders. *J Trauma Stress*. 2017;30(2):107-114. doi:<https://dx.doi.org/10.1002/jts.22178> PMID:28370461
38. Grabich SC, Robinson WR, Konrad CE, Horney JA. Impact of Hurricane Exposure on Reproductive Health Outcomes, Florida, 2004. *Disaster Med Public Health Prep*. 2017;11(4):407-411. doi:<https://dx.doi.org/10.1017/dmp.2016.158> PMID:28093094
39. Zheng J, Han W, Jiang B, Ma W, Zhang Y. Infectious Diseases and Tropical Cyclones in Southeast China. *Int J Environ Res Public Health*. 2017;14(5)doi:<https://dx.doi.org/10.3390/ijerph14050494> PMID:28481286
40. Schwartz RM, Gillezeau CN, Liu B, Lieberman-Cribbin W, Taioli E. Longitudinal Impact of Hurricane Sandy Exposure on Mental Health Symptoms. *Int J Environ Res Public Health*. 2017;14(9)doi:<https://dx.doi.org/10.3390/ijerph14090957> PMID:28837111
41. Sharp MJ, Sun M, Ledneva T, Lauper U, Pantea C, Lin S. Effect of Hurricane Sandy on Health Care Services Utilization Under Medicaid. *Disaster Med Public Health Prep*. 2016;10(3):472-84.

doi:<https://dx.doi.org/10.1017/dmp.2016.75> PMID:27181259

42. Dresser C, Allison J, Broach J, Smith M-E, Milsten A. High-amplitude Atlantic hurricanes produce disparate mortality in small, low-income countries. *Disaster Med Public Health Prep.* 2016;10(6):832-837. doi:<https://doi.org/10.1017/dmp.2016.62> PMID:27572097
43. Schwartz RM, Rothenberg P, Kerath SM, Liu B, Taioli E. The lasting mental health effects of Hurricane Sandy on residents of the Rockaways. *J Emerg Manag.* 2016;14(4):269-79. doi:<https://dx.doi.org/10.5055/jem.2016.0292> PMID:27575642
44. Marshall EG, Lu SE, Shi Z, Swerdel J, Borjan M, Lumia ME. Work-Related Unintentional Injuries Associated with Hurricane Sandy in New Jersey. Article. *Disaster Med Public Health Prep.* 2016;10(3):394-404. doi:<https://doi.org/10.1017/dmp.2016.47> PMID:27080323
45. Deng Z, Xun H, Zhou M, et al. Impacts of tropical cyclones and accompanying precipitation on infectious diarrhea in cyclone landing areas of Zhejiang Province, China. *Int J Environ Res Public Health.* 2015;12(2):1054-68. doi:<https://dx.doi.org/10.3390/ijerph120201054> PMID:25622139
46. Wang W, Xun HM, Zhou MG, et al. Impacts of Typhoon 'Koppu' on Infectious Diarrhea in Guangdong Province, China. *Biomed Environ Sci.* 2015;28(12):920-3. doi:<https://dx.doi.org/10.3967/bes2015.127> PMID:26777913
47. Tian XL, Guan X. The impact of hurricane Katrina on students' behavioral disorder: A difference-in-difference analysis. *Int J Environ Res Public Health.* 2015;12(5):5540-5560. doi:<http://dx.doi.org/10.3390/ijerph120505540> PMID:26006127
48. Antipova A, Curtis A. The post-disaster negative health legacy: pregnancy outcomes in Louisiana after Hurricane Andrew. *Disasters.* 2015;39(4):665-86. doi:<https://dx.doi.org/10.1111/disa.12125> PMID:25754615
49. Swerdel JN, Janevic TM, Cosgrove NM, Kostis JB. The effect of hurricane sandy on cardiovascular events in New Jersey. *J Am Heart Assoc.* 2014;3(6):001354. doi:<http://dx.doi.org/10.1161/JAHA.114.001354> PMID:25488295
50. Kim S, Shin Y, Kim H, Pak H, Ha J. Impacts of typhoon and heavy rain disasters on mortality and infectious diarrhea hospitalization in South Korea. *Int J Environ Res Public Health.* 2013;23(5):365-76. doi:<https://dx.doi.org/10.1080/09603123.2012.733940> PMID:23075392
51. Frahm KA, Barnett SD, Brown LM, et al. Posttraumatic stress disorder and use of psychiatric and alcohol related services: the effect of the 2004-2005 Florida hurricane seasons on veterans. *Community mental health journal.* 2013;49(6):636-42. doi:<https://dx.doi.org/10.1007/s10597-012-9558-2>
52. Fullerton CS, McKibben JBA, Reissman DB, et al. Posttraumatic stress disorder, depression, and alcohol and tobacco use in public health workers after the 2004 Florida hurricanes. *Disaster Med Public Health Prep.* 2013;7(1):89-95. doi:<https://dx.doi.org/10.1017/dmp.2013.6> PMID:24618140
53. Lin CH, Hou SK, Shih FF, Su S. The effect of tropical cyclones (typhoons) on emergency department visits. *J Emerg Med.* Sep 2013;45(3):372-9. doi:10.1016/j.jemermed.2013.02.002 PMID:23849369
54. Howard D, Zhang R, Huang Y, Kutner N. Hospitalization rates among dialysis patients during Hurricane Katrina. *Prehosp Disaster Med.* 2012;27(4):325-9. doi:<https://doi.org/10.1017/S1049023X12000945> PMID:22809870
55. Mills LD, Mills TJ, Macht M, Levitan R, De Wulf A, Afonso NS. Post-traumatic stress disorder in an

- emergency department population one year after Hurricane Katrina. *J Emerg Med.* 2012;43(1):76-82. doi:<https://dx.doi.org/10.1016/j.jemermed.2011.06.124> PMID:22365529
56. Panda S, Pati KK, Bhattacharya MK, Koley H, Pahari S, Nair GB. Rapid situation & response assessment of diarrhoea outbreak in a coastal district following tropical cyclone AILA in India. *The Indian journal of medical research.* 2011;133:395-400.
57. Dosa D, Feng Z, Hyer K, Brown LM, Thomas K, Mor V. Effects of Hurricane Katrina on nursing facility resident mortality, hospitalization, and functional decline. *Disaster Med Public Health Prep.* 2010;4 Suppl 1:S28-32. doi:<https://dx.doi.org/10.1001/dmp.2010.11> PMID:23105032
58. Zahran S, Snodgrass JG, Peek L, Weiler S. Maternal hurricane exposure and fetal distress risk. *Risk Anal.* 2010;30(10):1590-601. doi:<https://dx.doi.org/10.1111/j.1539-6924.2010.01453.x> PMID:20626684
59. Kutner NG, Muntner P, Huang Y, et al. Effect of Hurricane Katrina on the mortality of dialysis patients. *Kidney Int.* 2009;76(7):760-6. doi:<https://dx.doi.org/10.1038/ki.2009.268> PMID:19657326
60. Burton LC, Skinner EA, Uscher-Pines L, et al. Health of medicare advantage plan enrollees at 1 year after Hurricane Katrina. *Am J Manag Care.* 2009;15(1):13-22. doi:<https://europepmc.org/article/med/19146360> PMID:19146360
61. Tees MT, Harville EW, Xiong X, Buekens P, Pridjian G, Elkind-Hirsch K. Hurricane Katrina-Related Maternal Stress, Maternal Mental Health, and Early Infant Temperament. *Matern Child Health J.* 2009;1-8. doi:<http://dx.doi.org/10.1007/s10995-009-0486-x> PMID:19554438
62. Fonseca VA, Smith H, Kuhadiya N, et al. Impact of a natural disaster on diabetes: exacerbation of disparities and long-term consequences. *Diabetes Care.* 2009;32(9):1632-8. doi:<https://dx.doi.org/10.2337/dc09-0670> PMID:19542210
63. Anastario M, Shehab N, Lawry L. Increased gender-based violence among women internally displaced in Mississippi 2 years post-Hurricane Katrina. *Disaster Med Public Health Prep.* 2009;3(1):18-26. doi:<https://dx.doi.org/10.1097/DMP.0b013e3181979c32> PMID:19293740
64. Harville EW, Xiong X, Pridjian G, Elkind-Hirsch K, Buekens P. Postpartum mental health after Hurricane Katrina: a cohort study. *BMC Pregnancy Childbirth.* 2009;9:21. doi:<https://dx.doi.org/10.1186/1471-2393-9-21> PMID:19505322
65. Xiong X, Harville EW, Mattison DR, Elkind-Hirsch K, Pridjian G, Buekens P. Exposure to Hurricane Katrina, post-traumatic stress disorder and birth outcomes. *Am J Med Sci.* Jan 2008;341(1):85-85. doi:<https://doi.org/10.1097/MAJ.0b013e318180f21c> PMID:18703903
66. Kessler RC, Galea S, Jones RT, Parker HA, Hurricane Katrina Community Advisory G. Mental illness and suicidality after Hurricane Katrina. *Bull World Health Organ.* 2006;84(12):930-9. doi:<https://doi.org/10.2471/blt.06.033019> PMID:17242828
67. Fried BJ, Domino ME, Shadle J. Use of mental health services after hurricane Floyd in North Carolina. *Psychiatr Serv.* 2005;56(11):1367-73. doi:<https://doi.org/10.1176/appi.ps.56.11.1367> PMID:16282254
68. Keenan HT, Marshall SW, Nocera MA, Runyan DK. Increased incidence of inflicted traumatic brain injury in children after a natural disaster. *Am J Prev Med.* 2004;26(3):189-93. doi:<https://doi.org/10.1016/j.amepre.2003.10.023> PMID:15026097
69. Sanders EJ, Rigau-PÃ J, Smits HL, et al. Increase of leptospirosis in dengue-negative patients after a

hurricane in Puerto Rico in 1996 [correction of 1966]. *Am J Trop Med Hyg.* 1999;61(3):399-404.  
doi:<https://doi.org/10.4269/ajtmh.1999.61.399> PMID:10497979

70. Hendrickson LA, Vogt RL, Goebert D, Pon E. Morbidity on Kauai before and after Hurricane Iniki. *Prev Med.* 1997;26(5 Pt 1):711-6. doi:<https://doi.org/10.1006/pmed.1997.0196> PMID:9327481

71. Hendrickson LA, Vogt RL. Mortality of Kauai residents in the 12-month period following Hurricane Iniki. *Am J Epidemiol.* Jul 15 1996;144(2):188-91. doi:<https://doi.org/10.1093/oxfordjournals.aje.a008907> PMID:8678051

72. Garrison CZ, Weinrich MW, Hardin SB, Weinrich S, Wang L. Post-traumatic stress disorder in adolescents after a hurricane. *Am J Epidemiol.* 1993;138(7):522-30.  
doi:<https://doi.org/10.1093/oxfordjournals.aje.a116886> PMID:8213756
