# Supplementary material
Source: PubMed Central journal article supplement (PMC10461789)
Supplement: ehp12158.smcontents.508.pdf [file ehp12158.smcontents.508.pdf]

**Note to readers with disabilities:** *EHP* strives to ensure that all journal content is accessible to all readers. However, some figures and Supplemental Material published in *EHP* articles may not conform to [508 standards](#) due to the complexity of the information being presented. If you need assistance accessing journal content, please contact [ehp508@niehs.nih.gov](mailto:ehp508@niehs.nih.gov). Our staff will work with you to assess and meet your accessibility needs within 3 working days.

### **Supplemental Material**

#### **Health Effects of Cyclones: A Systematic Review and Meta-Analysis of Epidemiological Studies**

Wenzhong Huang, Yuan Gao, Rongbin Xu, Zhengyu Yang, Pei Yu, Tingting Ye, Elizabeth A. Ritchie, Shanshan Li, and Yuming Guo

#### **Table of Contents**

**Table S1.** Search strategies and initial results, organised by database.

**Table S2.** Criteria for the risk of bias assessment for included studies, adapted from the Office of Health Assessment and Translation (OHAT).

**Table S3.** Summary of the basic characteristics of the included studies.

**Table S4.** Heat map for risk of bias rating and quality rating for the included studies.

**Table S5.** Details of risk of bias assessment for included studies.

**Table S6.** Summary of the studies included in meta-analysis and sensitivity analysis by excluding each effect estimate in turn.

**Figure S1.** Flowchart of the study selection.

**Figure S2.** Contour-enhanced funnel plot analysis on the detection of publication bias in the meta-analysis of the association between cyclone exposures and all-cause (a), heart disease (b) and diabetes (c) mortality, with background color indicating the significance of the studies ( $P \geq 0.05$ : white background;  $P < 0.05$ : dark blue;  $P < 0.025$ : blue;  $P < 0.01$ : light blue).

**Figure S3.** Contour-enhanced funnel plot analysis on the detection of publication bias in the meta-analysis of the association between cyclone exposures and all-cause hospitalization (a), respiratory hospitalization (b) and chronic obstructive pulmonary disease hospitalization, with background color indicating the significance of the studies ( $P \geq 0.05$ : white background;  $P < 0.05$ : dark blue;  $P < 0.025$ : blue;  $P < 0.01$ : light blue).

**Figure S4.** Contour-enhanced funnel plot analysis on the detection of publication bias in the meta-analysis of the association between cyclone exposures and preterm birth, with background color indicating the significance of the studies ( $P \geq 0.05$ : white background;  $P < 0.05$ : dark blue;  $P < 0.025$ : blue;  $P < 0.01$ : light blue).

## References
